# Supplementary material for: Effectiveness of postdischarge interventions for reducing the severity of chronic pain after total knee replacement: systematic review of randomised controlled trials
Source: PubMed Central journal article supplement (PMC5855247; doi:10.1136/bmjopen-2017-020368), 2018-02-28
Supplement: bmjopen-2017-020368.draft_revisions.pdf [file bmjopen-2017-020368.draft_revisions.pdf]

# BMJ Open

BMJ Open is committed to open peer review. As part of this commitment we make the peer review history of every article we publish publicly available.

When an article is published we post the peer reviewers' comments and the authors' responses online. We also post the versions of the paper that were used during peer review. These are the versions that the peer review comments apply to.

The versions of the paper that follow are the versions that were submitted during the peer review process. They are not the versions of record or the final published versions. They should not be cited or distributed as the published version of this manuscript.

BMJ Open is an open access journal and the full, final, typeset and author-corrected version of record of the manuscript is available on our site with no access controls, subscription charges or pay-per-view fees (<http://bmjopen.bmj.com>).

If you have any questions on BMJ Open's open peer review process please email [editorial.bmjopen@bmj.com](mailto:editorial.bmjopen@bmj.com)

# BMJ Open

## The effectiveness of post-discharge intervention for reducing the severity of chronic pain after total knee replacement: Systematic review of randomised controlled trials

|                                 |                                                                                                                                                                                                                                                                                                |
|---------------------------------|------------------------------------------------------------------------------------------------------------------------------------------------------------------------------------------------------------------------------------------------------------------------------------------------|
| Journal:                        | <i>BMJ Open</i>                                                                                                                                                                                                                                                                                |
| Manuscript ID                   | bmjopen-2017-020368                                                                                                                                                                                                                                                                            |
| Article Type:                   | Research                                                                                                                                                                                                                                                                                       |
| Date Submitted by the Author:   | 30-Oct-2017                                                                                                                                                                                                                                                                                    |
| Complete List of Authors:       | Wylde, Vikki; University of Bristol, Musculoskeletal Research Unit<br>Dennis, Jane; University of Bristol, Musculoskeletal Research Unit<br>Gooberman-Hill, Rachael; University of Bristol, School of Clinical Sciences<br>Beswick, Andrew; University of Bristol, School of Clinical Sciences |
| <b>Primary Subject Heading</b>: | Rehabilitation medicine                                                                                                                                                                                                                                                                        |
| Secondary Subject Heading:      | Surgery, Health services research                                                                                                                                                                                                                                                              |
| Keywords:                       | Total knee replacement, Chronic post-surgical pain, Prevention, Systematic review                                                                                                                                                                                                              |
|                                 |                                                                                                                                                                                                                                                                                                |

SCHOLARONE™  
Manuscripts

1  
2  
3 **The effectiveness of post-discharge intervention for reducing the severity of chronic**  
4 **pain after total knee replacement: Systematic review of randomised controlled trials**  
5  
6  
7

8  
9 Wylde V<sup>1,2</sup>, Dennis J<sup>1</sup>, Gooberman-Hill R<sup>1,2</sup>, Beswick AD<sup>1</sup>  
10

11  
12 <sup>1</sup>Musculoskeletal Research Unit, Translational Health Sciences, Bristol Medical School,  
13  
14 University of Bristol, UK  
15

16  
17 <sup>2</sup>National Institute for Health Research Bristol Biomedical Research Centre, University of  
18  
19 Bristol, UK  
20

21 **E-mail addresses**  
22

23  
24 Vikki Wylde: [v.wylde@bristol.ac.uk](mailto:v.wylde@bristol.ac.uk)  
25

26  
27 Jane Dennis: [jane.dennis@bristol.ac.uk](mailto:jane.dennis@bristol.ac.uk)  
28

29  
30 Rachael Gooberman-Hill: [r.goberman-hill@bristol.ac.uk](mailto:r.goberman-hill@bristol.ac.uk)  
31

32  
33 Andrew Beswick: [andy.beswick@bristol.ac.uk](mailto:andy.beswick@bristol.ac.uk)  
34  
35

36  
37 **Corresponding author**  
38

39 Dr Vikki Wylde, Musculoskeletal Research Unit, Translational Health Sciences, Bristol  
40  
41 Medical School, Learning and Research Building, Southmead Hospital, Bristol, BS10 5NB,  
42  
43 UK  
44

45 E-mail: [V.Wylde@bristol.ac.uk](mailto:V.Wylde@bristol.ac.uk), Telephone: +44 (0)117 414 7878  
46  
47  
48  
49  
50

51  
52 **Word count: 2744**  
53

54 Running title: Post-discharge interventions and chronic pain after TKR  
55  
56  
57

## ABSTRACT

### Objective

Approximately 20% of patients experience chronic pain after total knee replacement (TKR). The aim of this systematic review was to evaluate the effectiveness of post-discharge interventions delivered in the first three months after surgery in reducing the severity of chronic pain after TKR.

### Design

The protocol for this systematic review was registered on PROSPERO (CRD42017041382). MEDLINE, Embase, CINAHL, PsycINFO and *The Cochrane Library* were searched from inception to November 2016. Randomised controlled trials of post-discharge intervention which commenced in the first three months after TKR surgery were included. The primary outcome of the review was self-report pain severity at 12 months or longer after TKR. Risk of bias was assessed using the Cochrane risk-of-bias tool.

### Results

Sixteen trials with data from 2,451 randomised participants were included. The majority of trials evaluated physiotherapy interventions (n=12); other interventions included nurse-led interventions, neuromuscular electrical stimulation and a multidisciplinary intervention.

Meta-analysis of six studies comparing physiotherapy with usual care found no difference in long-term pain (SMD -0.14, 95% CI -0.41, 0.13). Narrative synthesis supported the findings from meta-analysis. For non-physiotherapy interventions, there was insufficient evidence to draw conclusions about effectiveness.

### Conclusion

1  
2  
3 This systematic review found evidence that post-discharge physiotherapy interventions  
4 delivered uniformly to all patients in the first three months after TKR do not appear to be  
5 effective at reducing the severity of chronic pain. Further research is needed to evaluate  
6 whether stratified physiotherapy care and multidisciplinary interventions can reduce the  
7 severity of chronic pain after TKR.  
8  
9  
10  
11  
12  
13  
14  
15  
16

17 **Key words:** Total knee replacement, chronic post-surgical pain, prevention, systematic  
18 review  
19  
20  
21  
22  
23  
24  
25  
26  
27

### 28 **Strengths and limitations of this study**

- 29  
30  
31 • This is the first systematic review to evaluate the effectiveness of post-discharge  
32 interventions delivered in the first three months after surgery in reducing the severity  
33 of chronic pain after total knee replacement.  
34  
35
- 36  
37 • Synthesis of adverse events data was not possible because assessment and reporting  
38 was variable and often poor.  
39  
40
- 41  
42 • We did not include studies that used a composite pain and function measure to assess  
43 pain outcome.  
44  
45  
46  
47  
48  
49  
50  
51  
52  
53  
54  
55  
56  
57

## INTRODUCTION

Total knee replacement (TKR) is a common operation to provide pain relief, predominately due to osteoarthritis. Despite good outcomes for many, some patients report chronic pain in the months and years after TKR. Chronic post-surgical pain is defined as pain that is present or increases in intensity at  $\geq 3$  months after surgery [1]. In representative populations, unfavourable long-term pain outcomes have been reported by 10-34% of patients with TKR [2]. Patients with bothersome pain at  $\geq 3$  months after surgery are disappointed with their outcome [3 4]. Given the prevalence and impact of chronic pain, it is important to evaluate interventions that may optimise patients' outcomes after TKR.

During the hospital stay after TKR, rehabilitation focuses on regaining range of motion and improving mobility. After discharge, rehabilitation aims to enhance recovery, through supporting a person to regain function and quality of life, optimising pain relief and re-integration into social and personal environments [5]. While physiotherapy often focusses on functional health, another key outcome is the prevention of long-term pain [6]. Post-operative physiotherapy may be combined with other interventions to provide comprehensive, multidisciplinary and holistic rehabilitation [7]. Therefore, a key step to improving patients' outcomes after TKR is to evaluate if early post-operative rehabilitation interventions can reduce the severity of chronic pain after TKR.

The aim of this systematic review was to evaluate the effectiveness of post-discharge interventions delivered in the first three months after surgery for reducing the severity of chronic pain after TKR.

## METHODS

The review was registered on the international prospective register of systematic reviews (PROSPERO) on 17<sup>th</sup> January 2017 (registration number CRD42017041382). The review was conducted following guidance from the Cochrane Handbook [8] and reported in accordance with PRISMA guidelines [9] (Appendix 1).

### Eligibility criteria

Studies were eligible for inclusion in the review if they met the following criteria:

**Population:** Adults discharged from hospital after primary TKR predominantly for osteoarthritis.

**Intervention:** Any post-discharge intervention which commenced in the first three months after TKR surgery.

**Control:** Any, including no intervention, usual care, placebo or an alternative intervention.

**Outcomes:** The primary outcome was pain severity at 12 months or longer after TKR, as patient-reported levels of pain plateau by this time point [10 11]. Pain severity could be assessed using a patient-reported joint-specific pain measure (e.g. WOMAC or KOOS pain domains), a quality of life measure (e.g. SF-36 or SF-12) or a Visual Analogue Scale (VAS).

The secondary outcome was serious adverse events.

**Study type:** Randomised controlled trials (RCTs).

### Information sources and searches

MEDLINE, Embase, CINAHL, PsycINFO and *The Cochrane Library* were searched from inception to 15th November 2016 (Appendix 2). No language restrictions were applied and relevant non-English articles were translated and included if appropriate. Studies reported

1  
2  
3 only as abstracts or that were unobtainable as full text copies using inter-library loans or  
4  
5 email contact with authors were excluded. Citations of key reviews and studies were checked  
6  
7 in ISI Web of Science.  
8  
9

## 10 **Screening**

11  
12 Records identified by searches were imported into Endnote X7 (Thomson Reuters) and  
13  
14 duplicates removed. From the searches, an Endnote database of all RCTs and systematic  
15  
16 reviews in TKR was established. Within this database, interventions conducted during the  
17  
18 post-operative period were identified. An initial screen for potential eligibility was  
19  
20 undertaken by one reviewer (ADB) to exclude articles that were clearly not relevant.  
21  
22 Subsequently, abstracts and full-text articles were screened independently by two reviewers  
23  
24 (VW and ADB or JD) and reasons for exclusion recorded.  
25  
26  
27

## 28 **Data extraction**

29  
30  
31 Data from studies that met the eligibility criteria were extracted onto a standardised proforma  
32  
33 by one reviewer (VW). Data extraction was checked against source articles by a second  
34  
35 reviewer (JD). Extracted data comprised: country, date, participant characteristics, selection  
36  
37 criteria; intervention and control treatment; follow up intervals; losses to follow-up; outcome  
38  
39 data for pain (means and standard deviations or medians and ranges); serious adverse events  
40  
41 and information for risk of bias assessment. Any disagreements between reviewers were  
42  
43 discussed with a third reviewer (ADB) and consensus reached.  
44  
45  
46

47  
48 A single e-mail was sent to authors of studies with an appropriate follow-up period but no  
49  
50 pain outcome to enquire if an appropriate outcome was available. If a combined pain and  
51  
52 function outcome was reported, such as the OKS or the total WOMAC score, separate pain  
53  
54 subscale data were requested. Authors were contacted when necessary for clarification  
55  
56 purposes or to request unpublished relevant data. If a study reported data that were combined  
57  
58  
59  
60



1  
2  
3 for knee and hip replacement patients, then disaggregated data for patients with TKR were  
4 requested. If this was not available, then the study was excluded.  
5  
6

### 7 8 **Risk of bias assessment** 9

10 Potential sources of bias were assessed using the Cochrane risk of bias tool [8]. At the  
11 protocol stage, analysis was planned which included all studies, with sensitivity analyses  
12 conducted to exclude studies judged to be at high risk of bias.  
13  
14  
15  
16

### 17 18 **Strategy for data synthesis** 19

20  
21 At the protocol stage, meta-analysis using RevMan 5 [12] was planned if two or more studies  
22 were identified with similar interventions and comparator groups and appropriate outcome  
23 data. If continuous pain outcomes were measured differently across studies, overall  
24 standardised mean differences and 95% confidence intervals would be calculated and  
25 presented alongside measures of heterogeneity ( $I^2$ ). Where possible, subgroup analyses were  
26 planned to explore the effectiveness of different intervention content and intensity, and  
27 different comparator interventions. When pooling outcome data was not appropriate, a  
28 narrative synthesis was planned.  
29  
30  
31  
32  
33  
34  
35  
36  
37  
38  
39  
40  
41

## 42 **RESULTS** 43 44

45 Searches identified 7,954 articles. After detailed evaluation of full-text articles, 16 studies  
46 with 2,451 randomised participants were included [13-28] (Figure 1). Two included studies  
47 were published after the search dates, but were identified from protocols published within the  
48 search dates [14 16].  
49  
50  
51  
52  
53

### 54 **Study characteristics** 55 56 57

1  
2  
3 Table 1 provides an overview of study characteristics. Included studies were from Australia  
4 (n=3), Canada (n=2), Finland (n=2), Germany (n=2), United Kingdom (n=2), China (n=1),  
5  
6 Denmark (n=1), Italy (n=1), Norway (n=1) and United States of America (n=1). The number  
7  
8 of centres was reported for 14 studies: seven studies were conducted in a single centre, three  
9  
10 studies were conducted in two centres, and four studies were conducted in  $\geq 4$  centres. Sample  
11  
12 sizes ranged from 47 to 422 participants, with a median of 138. All studies had two arms,  
13  
14 with the exception of one three-arm trial [19]. Three studies were described as pilot or  
15  
16 feasibility studies [15 17 23].  
17  
18  
19  
20

### 21 **Study quality**

22  
23 Risk of bias assessments for individual studies are displayed in Table 2. All studies were at  
24  
25 high risk of bias for blinding of participants and pain outcome assessment due to the nature of  
26  
27 the intervention and the self-reporting of pain. Six studies were at high risk of bias due to  
28  
29 incomplete outcome data. Possible risk of selective outcome reporting was identified for two  
30  
31 studies.  
32  
33  
34

### 35 **Outcomes assessment**

36  
37 Pain was most commonly assessed using the WOMAC pain scale (n=9); other tools included  
38  
39 the KOOS pain scale (n=4), VAS (n=1), and single items from the OKS (n=1) and KOS ADL  
40  
41 (n=1). Serious adverse events were poorly described and reported in the majority of studies  
42  
43 and therefore pooling of harms data was not possible. A summary of adverse events findings  
44  
45 is presented in Appendix 3. Pain was assessed at 12 months after TKR in 15 studies and at 14  
46  
47 months in one study. A summary of results from the individual studies is provided in  
48  
49 Appendix 4.  
50  
51  
52

### 53 **Interventions**

1  
2  
3 The majority of studies evaluated physiotherapy interventions (n=12); other interventions  
4 evaluated included nurse-led interventions (n=2), neuromuscular electrical stimulation  
5 (NMES) (n=1) and a multidisciplinary intervention (n=1).  
6  
7  
8  
9

### 10 **Physiotherapy interventions**

11  
12  
13 Twelve studies with 1,846 randomised patients evaluated the effectiveness of post-discharge  
14 physiotherapy interventions. There was considerable variation in the interventions evaluated.  
15  
16 Seven studies compared physiotherapy interventions with usual or minimal care; these  
17 interventions included a walking skills programme [13], group-based circuit exercise classes  
18 [16], ergometer cycling [21], home-based functional rehabilitation [23], clinic-based  
19 functional rehabilitation [24], home-based functional exercises aimed at managing  
20 kinesiophobia [25], and delayed monitored home exercises [28]. Five studies compare two  
21 forms of treatment including inpatient rehabilitation compared with home exercise [14],  
22 home-based functional exercise and home-based traditional exercise [17], 1:1 physiotherapy  
23 and home-based rehabilitation [20], early aquatic therapy and late aquatic therapy [22], and a  
24 three-arm trial comparing 1:1 physiotherapy, group-based circuit classes and a monitored  
25 home exercise programme [19]. All interventions started within two months of surgery, with  
26 the majority commencing within two weeks of surgery. Of the 12 studies, only one trial  
27 reported a difference in pain outcomes between groups; patients randomised to home-based  
28 exercises aimed at managing kinesiophobia had lower pain scores at 12 months post-  
29 operative compared with patients randomised to usual care [25].  
30  
31  
32  
33  
34  
35  
36  
37  
38  
39  
40  
41  
42  
43  
44  
45  
46  
47

48  
49 Meta-analysis was conducted with six studies that reported relevant pain outcome data to  
50 compare the effectiveness of physiotherapy interventions compared with usual care for  
51 reducing the severity of chronic pain after TKR [13 16 21 23-25] (Figure 2). Standardised  
52 mean differences were pooled using a random effects meta-analysis. No differences in pain  
53  
54  
55  
56  
57

1  
2  
3 outcomes were observed between treatments, with a standardised mean difference of -0.14  
4 (95% CI -0.41, 0.13; I<sup>2</sup> 69%). Similar results were obtained in sensitivity analysis excluding  
5 two studies at high risk of bias from incomplete outcome data [21 24] (Appendix 5).  
6  
7

8  
9  
10 Due to the small number of studies, subgroup analyses to explore the effectiveness of  
11 different intervention content and intensity, and different comparator interventions, were not  
12 possible.  
13  
14

### 15 16 17 **Nurse-led interventions**

18  
19  
20 Two studies with 319 randomised patients reported evaluation of a nurse-led intervention  
21 compared with no care or usual care. Except for issues relating to blinding, both studies were  
22 at low risk of bias. Both studies evaluated nurse-led structured telephone follow-up; one  
23 aimed to improve adherence to home exercise [15] and the other to provide information  
24 regarding well-being, integrity, prophylaxis, safety and other issues relevant to patients after  
25 TKR [27]. Pain outcome data (mean and standard deviations) were not available for latter  
26 study and therefore meta-analysis was not possible. Neither study found a difference in pain  
27 scores at 12 months post-operative between the intervention and control group.  
28  
29  
30  
31  
32  
33  
34  
35  
36  
37

### 38 39 **Other interventions**

40  
41 Two studies reported evaluations of other interventions. Except for issues relating to blinding,  
42 both studies were at low risk of bias. One trial involving 86 patients compared a group-based  
43 multidisciplinary programme with usual care [18]. This 10-day programme involved  
44 physiotherapy, Nordic walking, relaxation strategies, and sessions with a psychologist, social  
45 worker, nutritionist and orthopaedic surgeon. Another trial involving 200 patients evaluated a  
46 combined NMES and volitional strength training programme compared with volitional  
47  
48  
49  
50  
51  
52  
53  
54  
55  
56  
57  
58  
59  
60

1  
2  
3 strength training program without NMES [26]. Both studies found no difference in pain  
4  
5 scores at 12 months post-operative between the intervention and control group.  
6  
7

### 8 **Ongoing research**

9  
10 In searches of databases and citation searches on ISI Web of Science we identified a number  
11  
12 of published RCT protocols that are evaluating post-discharge interventions with a pain  
13  
14 outcome at  $\geq 12$  months after TKR. Interventions being evaluated include a digital activity  
15  
16 coaching system for home exercise [29], Wii-enhanced rehabilitation [30], group-based  
17  
18 outpatient physiotherapy with an individualised element [31], multicomponent rehabilitation  
19  
20 for patients at risk of a poor outcome [32] and physiotherapy for patients performing poorly  
21  
22 at six weeks after TKR [33]. Some of these studies are now finished and findings are likely to  
23  
24 be reported imminently.  
25  
26  
27  
28  
29  
30

### 31 **DISCUSSION**

32  
33 This systematic review aimed to evaluate the effectiveness of post-discharge interventions  
34  
35 delivered in the first three months after surgery for reducing the severity of chronic pain after  
36  
37 TKR. Interventions that predominately comprise physiotherapy have been evaluated in RCTs.  
38  
39 The evidence suggests that post-discharge physiotherapy interventions appear not be effective  
40  
41 at reducing the severity of chronic pain after TKR, although findings from the trial of home-  
42  
43 based functional exercise programmed aimed at managing kinesiophobia [25] were  
44  
45 encouraging and warrant further evaluation. There was insufficient evidence to draw  
46  
47 conclusions about the effectiveness of non-physiotherapy interventions, and further research  
48  
49 is needed.  
50  
51  
52  
53  
54  
55  
56  
57  
58  
59  
60

1  
2  
3 There are a number of strengths and limitations to this systematic review. The main outcome  
4 of interest in this review was pain severity at  $\geq 12$  months after TKR. Although the primary  
5 outcome of many of the included studies was function, pain severity was an important  
6 secondary outcome in these studies. Studies that used a composite pain and function measure  
7 to assess outcome, for example the OKS or WOMAC, were excluded if authors were unable  
8 to provide pain subscales scores. Although this reduced the number of studies eligible for  
9 inclusion, this approach was taken because pain and function are distinct outcome domains,  
10 with different predictors and recovery trajectories [34 35]. The secondary outcome of this  
11 review was adverse events, to allow the synthesis of harms data. However, synthesis was not  
12 possible because assessment and reporting of adverse events was variable and often poor. The  
13 quality of adverse events reporting is a common issue in surgical trials [36], and evidence-  
14 based recommendations are needed to promote standardisation, improve quality and reduce  
15 heterogeneity of adverse events reporting in orthopaedic studies. A potential limitation of the  
16 included studies was that they were all at high risk of bias due to the lack of participant  
17 blinding for self-report pain. However, blinding of participants is rarely possible in RCTs of  
18 this nature. Also, it would be expected that the risk would arise from participants in the  
19 intervention group reporting less pain, which may potentially be an issue with shorter-term  
20 outcomes, but this was not evident from the longer-term follow-up of the studies included in  
21 this review.  
22  
23  
24  
25  
26  
27  
28  
29  
30  
31  
32  
33  
34  
35  
36  
37  
38  
39  
40  
41  
42  
43

44 This systematic review took a broad approach by evaluating the effectiveness of any type of  
45 post-discharge intervention that aimed to reduce the severity of chronic pain after TKR.  
46

47 Previous systematic reviews of interventions to improve long-term outcomes after TKR have  
48 been conducted, but these have evaluated pre-operative interventions or have been narrower  
49 in focus. Systematic review of pre-operative interventions have found that exercise and  
50 education have a limited effect on improving pain and function after TKR [37-39]. Previous  
51  
52  
53  
54  
55  
56  
57

1  
2  
3 systematic reviews of post-discharge interventions have focussed on physiotherapy, finding  
4  
5 some evidence of short-term benefit but not long-term benefit [6 40]. One systematic review  
6  
7 has evaluated interventions for the management of chronic pain after TKR, identifying only a  
8  
9 single RCT of botulinum toxin A injections [41]. Our systematic review adds to this literature  
10  
11 by providing evidence that post-discharge physiotherapy interventions do not appear to be  
12  
13 effective at reducing the severity of chronic pain after TKR and highlighting the need for  
14  
15 further research on other intervention types.  
16  
17

18  
19 It is important to consider potential reasons why post-discharge physiotherapy does not  
20  
21 appear to be effective at reducing the severity of chronic pain after TKR. One possible reason  
22  
23 is that the interventions were uniformly delivered to all patients, rather than just those  
24  
25 patients who may be at most risk of poor outcome. Only 20% of patients will develop chronic  
26  
27 pain after TKR [2] and delivering physiotherapy to all patients may reduce the ability to  
28  
29 detect clinical benefit in terms of pain severity. This suggests a need to identify patients at  
30  
31 high risk of chronic pain and provide these patients with intensive and comprehensive  
32  
33 interventions that have been specifically designed to reduce their risk of developing chronic  
34  
35 pain. However, identifying high risk patients is challenging; pre-operative models to identify  
36  
37 patients at risk of a poor outcome have low predictive power [34 35], and the evidence for  
38  
39 post-operative risk factors is limited [42]. However, research is currently ongoing to evaluate  
40  
41 whether providing a rehabilitation programme for patients at risk of a poor outcome [43] or  
42  
43 are ‘functioning poorly’ at six weeks after TKR [33] can improve longer-term outcomes.  
44  
45  
46

47  
48 Another possible explanation for the apparent lack of effectiveness of post-operative  
49  
50 physiotherapy in reducing severity of chronic pain is the complexity of chronic pain after  
51  
52 TKR. Although chronic pain after TKR is not yet fully understood, the aetiology of this pain  
53  
54 is multifactorial, including surgical factors, complex regional pain syndrome, pain  
55  
56 sensitisation, neuropathic pain and psychosocial factors [44-49]. Therefore, an intervention  
57  
58  
59

1  
2  
3 comprising a single treatment modality, such as physiotherapy, may be insufficient to address  
4  
5 and reduce the causes of pain for all patients. As with the treatment of other chronic pain  
6  
7 conditions, this highlights the importance of focused, individualised and multidisciplinary  
8  
9 treatment [50 51]. Such an approach is being evaluated in an ongoing RCT of a care pathway  
10  
11 for patients with chronic pain after TKR (ISRCTN92545361). Therefore, stratified  
12  
13 physiotherapy care, in the context of individualised assessment and a multidisciplinary care  
14  
15 package, may be useful for some patients.  
16  
17

18  
19 In conclusion, this systematic review found evidence that post-discharge physiotherapy  
20  
21 interventions delivered uniformly to all patients in the first three months after TKR do not  
22  
23 appear to be effective at reducing the severity of chronic pain. Further research is needed to  
24  
25 evaluate whether stratified physiotherapy care and multidisciplinary interventions can reduce  
26  
27 the severity of chronic pain after TKR.  
28  
29  
30  
31  
32  
33  
34  
35  
36  
37  
38  
39  
40  
41  
42  
43  
44  
45  
46  
47  
48  
49  
50  
51  
52  
53  
54  
55  
56  
57  
58  
59  
60



## ACKNOWLEDGEMENTS

We would like to thank all the study authors who took the time to reply to our requests for further clarification or additional data.

## AUTHOR CONTRIBUTIONS

All authors contributed to the concept and design of the study. ADB, JD and VW contributed to the acquisition and analysis of data. VW drafted the article and ADB, JD and RGH revised it critically for important intellectual content. VW and ADB take responsibility for the integrity of the work as a whole, from inception to finished article.

## FUNDING

This article presents independent research funded by the National Institute for Health Research (NIHR) under its Programme Grants for Applied Research programme (RP-PG-0613-20001). The views expressed are those of the authors and not necessarily those of the NHS, the NIHR or the Department of Health. The funder had no involvement in the study design, data collection, data analysis, interpretation of data or writing of the manuscript.

This study was supported by the NIHR Biomedical Research Centre at the University Hospitals Bristol NHS Foundation Trust and the University of Bristol. The views expressed in this publication are those of the author(s) and not necessarily those of the NHS, the National Institute for Health Research or the Department of Health.

## COMPETING INTERESTS

The authors have no conflicts of interest to declare.

## DATA SHARING STATEMENT

No additional data are available.

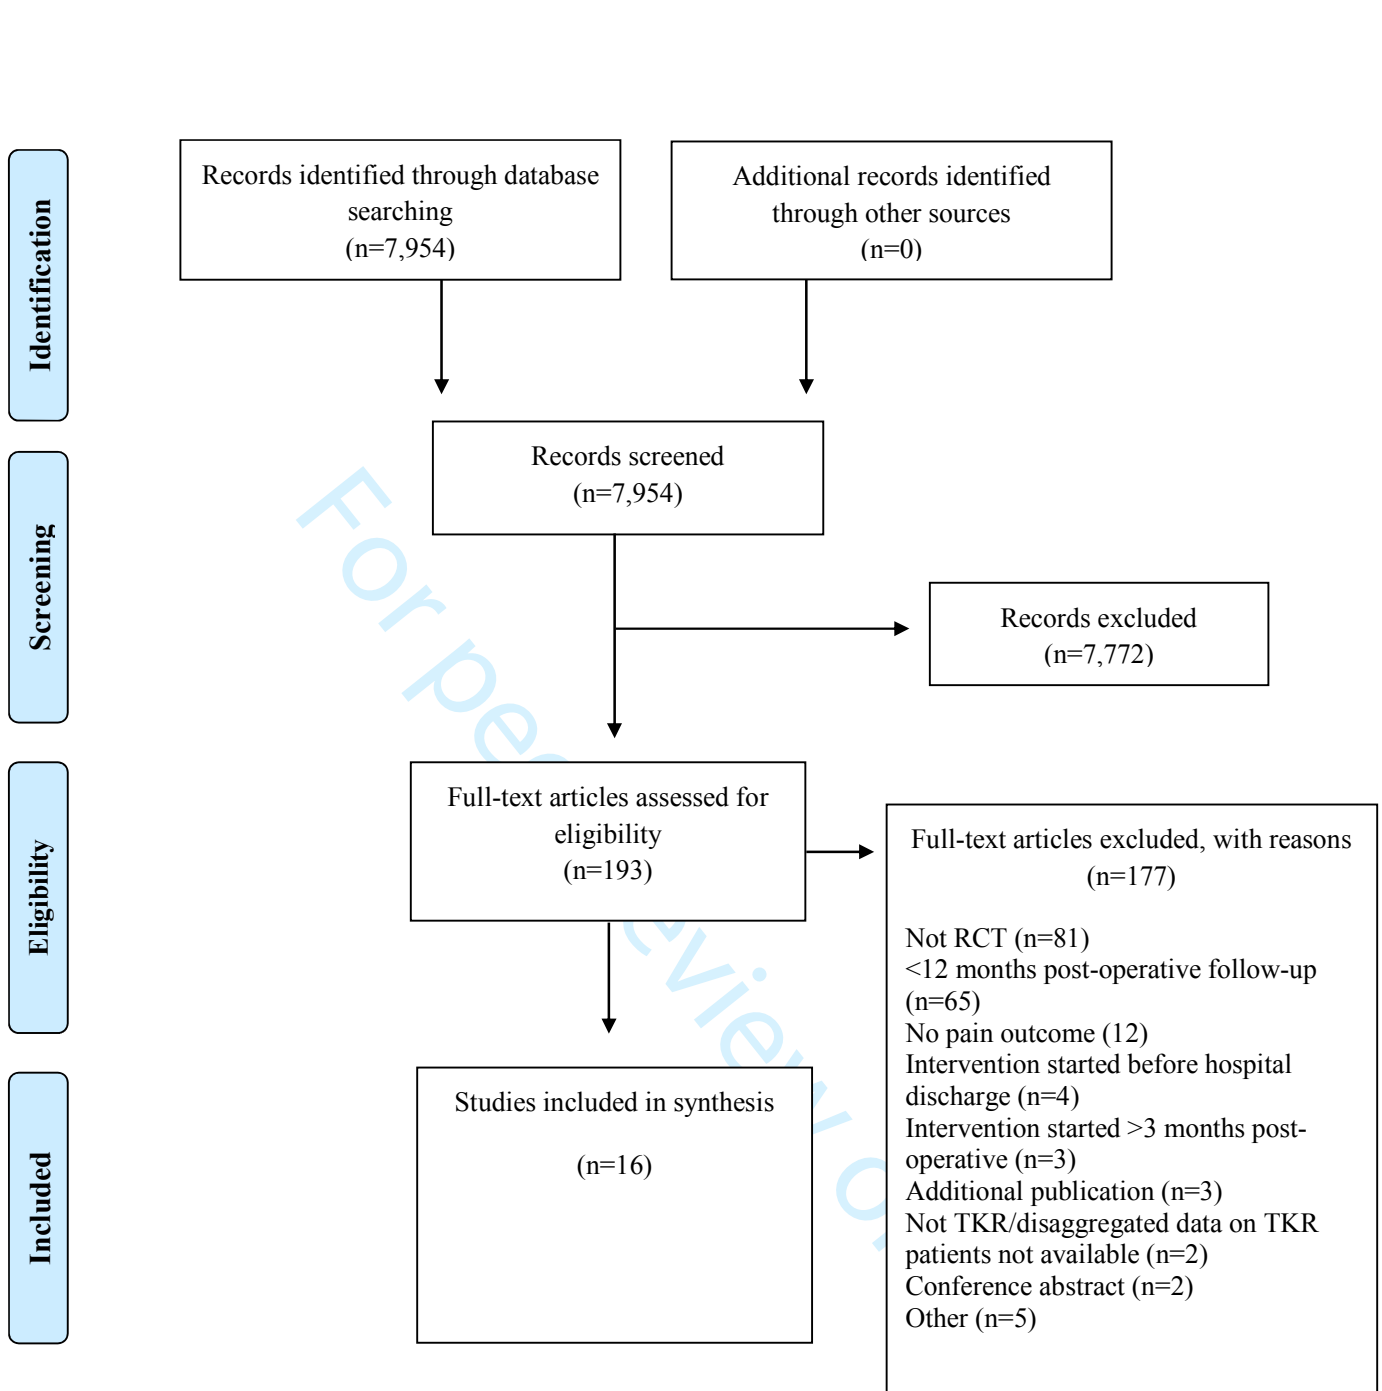

**Figure 1: Systematic review flow diagram**

**Table 1: Overview of study characteristics**

| Publication<br>Location<br>Date of study<br>Number of centres | Randomised<br>Mean age<br>% female      | Intervention treatment                                                                                                                                                                                                                           | Control treatment                                                                                                                             | Pain assessment<br>Adherence to treatment<br>Losses to follow-up                                                                         |
|---------------------------------------------------------------|-----------------------------------------|--------------------------------------------------------------------------------------------------------------------------------------------------------------------------------------------------------------------------------------------------|-----------------------------------------------------------------------------------------------------------------------------------------------|------------------------------------------------------------------------------------------------------------------------------------------|
| Bruun-Olsen et al, 2013<br>Norway<br>2008-2010<br>2 centres   | N=57(29:28)<br>68:69 years<br>62:50%    | Group-based physiotherapist-led walking skills programme (2-6 patients per group). Commenced 6 weeks after surgery. 12 sessions over 6-8 weeks.                                                                                                  | 1:1 usual physiotherapy care                                                                                                                  | KOOS pain scale<br>28/29 completed intervention<br>28/28 received control treatment<br>6 (2:4) lost to follow-up                         |
| Buhagiar et al, 2017<br>Australia<br>2012-2015<br>2 centres   | N=165(81:84)<br>67:67 years<br>69:68%   | Inpatient rehabilitation at rehabilitation facility with twice daily supervised sessions of 1:1 and group-based exercises. Commenced after hospital discharge for 10 days. Home exercise programme after discharge from rehabilitation facility. | Home exercise programme comprising of 2-3 group-based outpatient session to practice and progress exercises. Commenced 2 weeks after surgery. | KOOS pain scale<br>72/81 adhered to intervention<br>74/84 adhered to control treatment<br>6(2:4) lost to follow-up                       |
| Chen et al, 2016<br>China<br>2013-2014<br>1 centre            | N=202(101:101)<br>66:67 years<br>63:67% | Structured telephone follow-up by nurse at 1, 3 and 6 weeks after hospital discharge to improve adherence to home exercise routine.                                                                                                              | No telephone follow-up                                                                                                                        | Pain VAS<br>Adherence not reported<br>15(7:8) lost to follow-up                                                                          |
| Fransen et al, 2017<br>Australia<br>2009-2012<br>12 centres   | N=422(212:210)<br>64:65 years<br>54:52% | Group-based circuit exercise classes supervised by physiotherapist. Up to 6 patients per class. Commenced 6 weeks after surgery. Twice weekly sessions for at least 8 weeks.                                                                     | Usual physiotherapy care                                                                                                                      | WOMAC pain scale<br>140/212 participants attended $\geq 12$ classes<br>210/210 received control treatment<br>74(43:31) lost to follow-up |
| Frost et al, 2002<br>UK<br>1995-1996<br>Not reported          | N=47(23:24)<br>72:71 years<br>48:50%    | Home-based functional exercise. Commenced following discharge from hospital. Duration not reported.                                                                                                                                              | Home-based traditional exercise.                                                                                                              | OKS item (pain on walking)<br>Adherence not reported<br>20 (7:13) lost to follow-up                                                      |
| Kauppila et al, 2010 <sup>b</sup><br>Finland                  | N=86(44:42)<br>71:71 years              | Group-based multidisciplinary rehabilitation programme. Up to 8 patients per group.                                                                                                                                                              | Usual physiotherapy care.                                                                                                                     | WOMAC pain scale<br>44/44 attended intervention                                                                                          |

|                                                                      |                                                    |                                                                                                                                                |                                                                                                                                                                                                                                                                                                                                                                                   |                                                                                                                                                                                                           |
|----------------------------------------------------------------------|----------------------------------------------------|------------------------------------------------------------------------------------------------------------------------------------------------|-----------------------------------------------------------------------------------------------------------------------------------------------------------------------------------------------------------------------------------------------------------------------------------------------------------------------------------------------------------------------------------|-----------------------------------------------------------------------------------------------------------------------------------------------------------------------------------------------------------|
| 2002-2005<br>1 centre                                                | 76:79%                                             | Commenced 2-4 months after surgery for 10 days.                                                                                                |                                                                                                                                                                                                                                                                                                                                                                                   | 42:42 received control treatment<br>11 (8:3) lost to follow-up                                                                                                                                            |
| Ko et al, 2013<br>Australia<br>2008-2010<br>3 arm trial<br>4 centres | N=<br>249(85:84:80)<br>67:68:67 years<br>68:60:61% | 1:1 physiotherapy with home-based sessions. Commenced 2 weeks after surgery. Twice weekly 1:1 and home-based sessions over 6 weeks.            | 1.) Group-based circuit classes supervised by physiotherapist with home-based sessions. Up to 8 patients per class. Commenced 2 weeks after surgery. Twice weekly group and home-based sessions over 6 weeks.<br><br>2.) Monitored home programme, 2 1:1 physiotherapy sessions and 1 telephone follow-up call. Commenced 2 weeks after surgery. 4 sessions per week for 6 weeks. | WOMAC pain scale<br>80% participants attended 9 or more 1:1 sessions, 77% attended 9 or more group sessions, 83% attended both sessions in monitored home programme group.<br>16(7:3:6) lost to follow-up |
| Kramer et al, 2003<br>Canada<br>Not reported<br>Not reported         | N=160(80:80)<br>68:69 years<br>59:55%              | 1:1 clinic-based rehabilitation programme with home exercise programme. Commenced 2 weeks after surgery. Up to 2 sessions a week for 10 weeks. | Home-based rehabilitation, monitored by telephone calls from physiotherapist. Commenced 2 weeks after surgery. At least 1 telephone call in weeks 2-6 and 1 call in weeks 7-12.                                                                                                                                                                                                   | WOMAC pain scale<br>76/80 received intervention<br>78/80 received control treatment<br>26 (15:22) lost to follow-up                                                                                       |
| Liebs et al, 2010*<br>Germany<br>2005-2006<br>5 centres              | N=159(85:74)<br>70:70 years<br>73:70%              | Ergometer cycling supervised by physiotherapist. Commenced 2 weeks after surgery. 3 sessions a week for at least 3 weeks.                      | Usual physiotherapy care                                                                                                                                                                                                                                                                                                                                                          | WOMAC pain scale<br>Adherence not reported<br>33(15:18) lost to follow-up                                                                                                                                 |
| Liebs et al, 2012*<br>Germany<br>2003-2004<br>2 centres              | N=185(87:98)<br>69:71 years<br>70:73%              | Early aquatic therapy. Commenced 6 days after surgery. 3 times a week up to 5 <sup>th</sup> week post-operative.                               | Late aquatic therapy. Commenced 14 days after surgery. 3 times a week up to 5 <sup>th</sup> week post-operative.                                                                                                                                                                                                                                                                  | WOMAC pain scale<br>Adherence not reported<br>41(18:23) lost to follow-up                                                                                                                                 |

1  
2  
3  
4  
5  
6  
7  
8  
9  
10  
11  
12  
13  
14  
15  
16  
17  
18  
19  
20  
21  
22  
23  
24  
25  
26  
27  
28  
29  
30  
31  
32  
33  
34  
35  
36  
37  
38  
39  
40  
41  
42  
43  
44  
45  
46  
47

|                                                              |                                         |                                                                                                                                                                                           |                                                    |                                                                                                                                                                                   |
|--------------------------------------------------------------|-----------------------------------------|-------------------------------------------------------------------------------------------------------------------------------------------------------------------------------------------|----------------------------------------------------|-----------------------------------------------------------------------------------------------------------------------------------------------------------------------------------|
| Minns Lowe et al, 2012<br>UK<br>2006-2008<br>1 centre        | N=107 (56:51)<br>68:71 years<br>57:59%  | Home-based functional rehabilitation with 2 visits from physiotherapist at 2 weeks and 6-8 weeks after hospital discharge. Twice daily exercises for at least 3 months.                   | Usual physiotherapy care                           | KOOS pain scale<br>46/56 patients received 2 visits<br>47/51 received control treatment<br>9 (7:2) lost to follow-up                                                              |
| Moffet et al, 2004 [24]<br>Canada<br>1997-1999<br>5 centres  | N=77(38:39)<br>67:69 years<br>63:56%    | Functional rehabilitation programme with individualised home exercises. Commenced at 2 months after surgery. 12 supervised sessions over 6-8 weeks.                                       | Usual physiotherapy care.                          | WOMAC pain scale<br>38/38 participated in 12 sessions<br>39/39 received control treatment<br>8(0:8) lost to follow-up                                                             |
| Monticone et al, 2010-2013<br>Italy<br>1 centre              | N=110(55:55)<br>67:68 years<br>65:62%   | Home-based functional exercises aimed at managing kinesiophobia, with monthly phone calls to encourage adherence. Commenced after hospital discharge. Twice weekly sessions for 6 months. | No physiotherapy, advice to stay active.           | KOOS pain scale<br>Adherence not reported<br>0 lost to follow-up                                                                                                                  |
| Petterson et al, 2009<br>USA<br>200-2005<br>1 centre         | N=200(100:100)<br>65:65 years<br>47:45% | Combined neuromuscular electric stimulation (NMES) and volitional strength training programme. Commenced 3-4 weeks after surgery. 2 or 3 sessions a week for 6 weeks.                     | Volitional strength training program without NMES. | KOS ADL item (effect of pain on function)<br>84/100 completed intervention<br>97/100 completed control treatment<br>51 (32:19) lost to follow-up                                  |
| Szots et al, 2016<br>Denmark<br>2013<br>1 centre             | N=117(59:58)<br>67:68 years<br>61:67%   | Two nurse-led structured telephone follow-up calls. Telephone calls at 4 days and 14 days after hospital discharge.                                                                       | Usual care                                         | WOMAC pain scale<br>54/59 patients had both telephone follow-up calls<br>54/58 received control treatment<br>9(5:4) lost to follow-up                                             |
| Vuorenmaa et al, 2014 **<br>Finland<br>2008-2010<br>1 centre | N=108(53:55)<br>69:69 years<br>57:65%   | Delayed monitored home exercises, with guidance from physiotherapist at 2, 3 and 6 months post-operative. Commenced at 2 months after surgery for 12 months.                              | Usual care                                         | WOMAC pain scale<br>72% of patients performed the training sessions at least twice per week in the first 6 months<br>53/53 received control treatment<br>4(2:2) lost to follow-up |

\* 24 month follow-up also conducted but data from 12 month follow-up included in table to be consistent with follow-up period of other studies

1  
2  
3  
4  
5 \*\* Follow-up at 14 months post-operative

6 § Pain-specific outcome data was provided by the authors for a previous review [52] and was used again in this review  
7  
8  
9  
10  
11  
12  
13  
14  
15  
16  
17  
18  
19  
20  
21  
22  
23  
24  
25  
26  
27  
28  
29  
30  
31  
32  
33  
34  
35  
36  
37  
38  
39  
40  
41  
42  
43  
44  
45  
46  
47

For peer review only

**Table 2: Risk of bias assessment for individual studies**

|                  | Random sequence generation (selection bias) | Allocation concealment (selection bias) | Blinding of participants and personnel (performance bias) | Blinding of outcome assessment (detection bias) | Incomplete outcome data (attrition bias) | Selective reporting (reporting bias) | Other bias |
|------------------|---------------------------------------------|-----------------------------------------|-----------------------------------------------------------|-------------------------------------------------|------------------------------------------|--------------------------------------|------------|
| Bruun-Olsen 2013 | +                                           | +                                       | -                                                         | -                                               | +                                        | +                                    | +          |
| Buhagiar 2017    | +                                           | +                                       | -                                                         | -                                               | +                                        | +                                    | +          |
| Chen 2016        | +                                           | +                                       | -                                                         | -                                               | +                                        | ?                                    | +          |
| Fransen 2017     | +                                           | +                                       | -                                                         | -                                               | +                                        | +                                    | +          |
| Frost 2002       | +                                           | ?                                       | -                                                         | -                                               | -                                        | ?                                    | +          |
| Kauppila 2010    | +                                           | +                                       | -                                                         | -                                               | +                                        | +                                    | +          |
| Ko 2013          | +                                           | +                                       | -                                                         | -                                               | +                                        | +                                    | +          |
| Kramer 2003      | ?                                           | ?                                       | -                                                         | -                                               | +                                        | +                                    | +          |
| Liebs 2010       | +                                           | +                                       | -                                                         | -                                               | -                                        | +                                    | +          |
| Liebs 2012       | +                                           | +                                       | -                                                         | -                                               | -                                        | ?                                    | +          |
| Minns Lowe 2012  | +                                           | +                                       | -                                                         | -                                               | +                                        | +                                    | +          |
| Moffet 2004      | +                                           | +                                       | -                                                         | -                                               | -                                        | ?                                    | +          |
| Monticone 2013   | +                                           | +                                       | -                                                         | -                                               | +                                        | ?                                    | +          |
| Petterson 2009   | ?                                           | ?                                       | -                                                         | -                                               | -                                        | -                                    | +          |
| Szots 2016       | +                                           | +                                       | -                                                         | -                                               | +                                        | +                                    | +          |
| Vuornmaa 2014    | +                                           | +                                       | -                                                         | -                                               | +                                        | +                                    | +          |

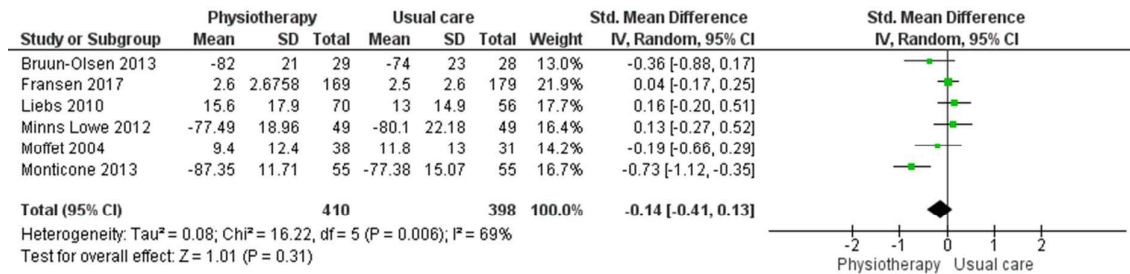

**Figure 2: Forest plot of the effectiveness of post-discharge physiotherapy vs. usual care in reducing chronic pain after TKR**



**REFERENCES**

1. Werner MU, Kongsgaard UE. I. Defining persistent post-surgical pain: is an update required? *Br J Anaesth* 2014;**113**(1):1-4.
2. Beswick AD, Wylde V, Gooberman-Hill R, et al. What proportion of patients report long-term pain after total hip or knee replacement for osteoarthritis? A systematic review of prospective studies in unselected patients. *BMJ Open* 2012;**2**(1):e000435.
3. Scott CE, Howie CR, MacDonald D, et al. Predicting dissatisfaction following total knee replacement: a prospective study of 1217 patients. *J Bone Joint Surg Br* 2010;**92**(9):1253-8.
4. Jeffery AE, Wylde V, Blom AW, et al. "It's there and I'm stuck with it": patients' experiences of chronic pain following total knee replacement surgery. *Arthritis Care Res (Hoboken)* 2011;**63**(2):286-92.
5. Artz N, Dixon S, Wylde V, et al. Physiotherapy provision following discharge after total hip and total knee replacement: a survey of current practice at high-volume NHS hospitals in England and Wales. *Musculoskeletal Care* 2013;**11**(1):31-8.
6. Artz N, Elvers K, Minns Lowe C, et al. Effectiveness of physiotherapy exercise following total knee replacement: systematic review and meta-analysis. *BMC Musculoskeletal Disorders* 2015;**16**(15).
7. Khan F, Ng L, Gonzalez S, et al. Multidisciplinary rehabilitation programmes following joint replacement at the hip and knee in chronic arthropathy. *Cochrane Database Syst Rev* 2008(2):CD004957.
8. Higgins J, Green SE. *Cochrane Handbook for Systematic Reviews of Interventions* Version 5.1.0 [updated March 2011]. The Cochrane Collaboration, 2011. Available from [www.cochrane-handbook.org](http://www.cochrane-handbook.org), 2011.
9. Moher D, Liberati A, Tetzlaff J, et al. Preferred reporting items for systematic reviews and meta-analyses: the PRISMA statement. *BMJ* 2009;**339**:b2535.
10. Lenguerrand E, Wylde V, Gooberman-Hill R, et al. Trajectories of Pain and Function after Primary Hip and Knee Arthroplasty: The ADAPT Cohort Study. *PLoS One* 2016;**11**(2):e0149306.
11. Kennedy DM, Stratford PW, Hanna SE, et al. Modeling early recovery of physical function following hip and knee arthroplasty. *BMC Musculoskelet Disord* 2006;**7**:100.

- 1  
2  
3 12. Review Manager. (RevMan) [Computer program]. Version 5.3. Copenhagen: The Nordic  
4 Cochrane Centre, The Cochrane Collaboration. 2014.
- 5  
6 13. Bruun-Olsen V, Heiberg KE, Wahl AK, et al. The immediate and long-term effects of a  
7 walking-skill program compared to usual physiotherapy care in patients who have  
8 undergone total knee arthroplasty (TKA): a randomized controlled trial. *Disability  
9 and rehabilitation* 2013;**35**(23):2008-15.
- 10  
11 14. Buhagiar MA, Naylor JM, Harris IA, et al. Effect of Inpatient Rehabilitation vs a  
12 Monitored Home-Based Program on Mobility in Patients With Total Knee  
13 Arthroplasty: The HIHO Randomized Clinical Trial. *JAMA* 2017;**317**(10):1037-46.
- 14  
15 15. Chen M, Li P, Lin F. Influence of structured telephone follow-up on patient compliance  
16 with rehabilitation after total knee arthroplasty. *Patient Preference and Adherence*  
17 2016;**10**:257-64.
- 18  
19 16. Fransen M, Nairn L, Bridgett L, et al. Post-Acute Rehabilitation After Total Knee  
20 Replacement: A Multicenter Randomized Clinical Trial Comparing Long-Term  
21 Outcomes. *Arthritis Care Res (Hoboken)* 2017;**69**(2):192-200.
- 22  
23 17. Frost H, Lamb SE, Robertson S. A randomized controlled trial of exercise to improve  
24 mobility and function after elective knee arthroplasty. Feasibility, results and  
25 methodological difficulties. *Clinical rehabilitation* 2002;**16**(2):200-9.
- 26  
27 18. Kauppila AM, Kyllonen E, Ohtonen P, et al. Multidisciplinary rehabilitation after primary  
28 total knee arthroplasty: a randomized controlled study of its effects on functional  
29 capacity and quality of life. *Clinical rehabilitation* 2010;**24**(5):398-411.
- 30  
31 19. Ko V, Naylor J, Harris I, et al. One-to-one therapy is not superior to group or home-based  
32 therapy after total knee arthroplasty: a randomized, superiority trial. *The Journal of  
33 bone and joint surgery. American volume* 2013;**95**(21):1942-9.
- 34  
35 20. Kramer JF, Speechley M, Bourne R, et al. Comparison of clinic- and home-based  
36 rehabilitation programs after total knee arthroplasty. *Clinical orthopaedics and related  
37 research* 2003(410):225-34.
- 38  
39 21. Liebs TR, Herzberg W, Ruther W, et al. Ergometer cycling after hip or knee replacement  
40 surgery: a randomized controlled trial. *The Journal of bone and joint surgery.  
41 American volume* 2010;**92**(4):814-22.
- 42  
43 22. Liebs T, Herzberg W, Ruther W, et al. Multicenter randomized controlled trial comparing  
44 early versus late aquatic therapy after total hip or knee arthroplasty. *Archives of  
45 physical medicine and rehabilitation* 2012; **93**(2).
- 46  
47  
48  
49  
50  
51  
52  
53  
54  
55  
56  
57  
58  
59  
60

- <http://onlinelibrary.wiley.com/o/cochrane/clcentral/articles/334/CN-00832334/frame.html>
- [http://ac.els-cdn.com/S0003999311008434/1-s2.0-S0003999311008434-main.pdf?\\_tid=41aa00ce-f508-11e6-b06b-00000aab0f27&acdnat=1487332829\\_31eb2562ac20096dc09cc02ed9cf1f7e](http://ac.els-cdn.com/S0003999311008434/1-s2.0-S0003999311008434-main.pdf?_tid=41aa00ce-f508-11e6-b06b-00000aab0f27&acdnat=1487332829_31eb2562ac20096dc09cc02ed9cf1f7e)
23. Minns Lowe CJ, Barker KL, Holder R, et al. Comparison of postdischarge physiotherapy versus usual care following primary total knee arthroplasty for osteoarthritis: an exploratory pilot randomized clinical trial. *Clinical rehabilitation* 2012;**26**(7):629-41.
24. Moffet H, Collet JP, Shapiro SH, et al. Effectiveness of intensive rehabilitation on functional ability and quality of life after first total knee arthroplasty: A single-blind randomized controlled trial. *Archives of physical medicine and rehabilitation* 2004;**85**(4):546-56.
25. Monticone M, Ferrante S, Rocca B, et al. Home-based functional exercises aimed at managing kinesiophobia contribute to improving disability and quality of life of patients undergoing total knee arthroplasty: a randomized controlled trial. *Archives of physical medicine and rehabilitation* 2013;**94**(2):231-9.
26. Petterson SC, Mizner RL, Stevens JE, et al. Improved function from progressive strengthening interventions after total knee arthroplasty: a randomized clinical trial with an imbedded prospective cohort. *Arthritis and rheumatism* 2009;**61**(2):174-83.
27. Szöts K, Konradsen H, Solgaard S, et al. Long-term effects of telephone follow-up after total knee arthroplasty. *Journal of Nursing Education and Practice* 2016;**6**(7):151-54.
28. Vuorenmaa M, Ylinen J, Piitulainen K, et al. Efficacy of a 12-month, monitored home exercise programme compared with normal care commencing 2 months after total knee arthroplasty: a randomized controlled trial. *Journal of rehabilitation medicine* 2014;**46**(2):166-72.
29. Harmelink KEM, Zeegers A, Tonis TM, et al. The effectiveness of the use of a digital activity coaching system in addition to a two-week home-based exercise program in patients after total knee arthroplasty: study protocol for a randomized controlled trial. *BMC Musculoskelet Disord* 2017;**18**(1):290.
30. Negus JJ, Cawthorne DP, Chen JS, et al. Patient outcomes using Wii-enhanced rehabilitation after total knee replacement - the TKR-POWER study. *Contemp Clin Trials* 2015;**40**:47-53.

- 1  
2  
3 31. Wylde V, Artz N, Marques E, et al. Effectiveness and cost-effectiveness of outpatient  
4 physiotherapy after knee replacement for osteoarthritis: study protocol for a  
5 randomised controlled trial. *Trials* 2016;**17**(1):289.
- 6  
7  
8 32. Barker KL, Beard D, Price A, et al. COmmunity-based Rehabilitation after Knee  
9 Arthroplasty (CORKA): Study protocol for a randomised controlled trial. *Trials*  
10 2016;**17**(1):no pagination.
- 11  
12  
13 33. Simpson AH, Hamilton DF, Beard DJ, et al. Targeted rehabilitation to improve outcome  
14 after total knee replacement (TRIO): study protocol for a randomised controlled trial.  
15 *Trials* 2014;**15**:44.
- 16  
17  
18 34. Judge A, Arden NK, Cooper C, et al. Predictors of outcomes of total knee replacement  
19 surgery. *Rheumatology (Oxford)* 2012;**51**(10):1804-13.
- 20  
21  
22 35. Lopez-Olivo MA, Landon GC, Siff SJ, et al. Psychosocial determinants of outcomes in  
23 knee replacement. *Ann Rheum Dis* 2011;**70**(10):1775-81.
- 24  
25  
26 36. Wylde V, Dennis J, Beswick AD, et al. Systematic review of management of chronic pain  
27 after surgery. *British Journal of Surgery* 2017;**104**(10):1293-306.
- 28  
29  
30 37. Blom AW, Artz N, Beswick AD, et al. Improving patients' experience and outcome of  
31 total joint replacement: the RESTORE programme. NIHR Journals Library.  
32 Southampton (UK), 2016.
- 33  
34  
35 38. Peer MA, Rush R, Gallacher PD, et al. Pre-surgery exercise and post-operative physical  
36 function of people undergoing knee replacement surgery: A systematic review and  
37 meta-analysis of randomized controlled trials. *J Rehabil Med* 2017;**49**(4):304-15.
- 38  
39  
40 39. Jordan RW, Smith NA, Chahal GS, et al. Enhanced education and physiotherapy before  
41 knee replacement; is it worth it? A systematic review. *Physiotherapy*  
42 2014;**100**(4):305-12.
- 43  
44  
45 40. Minns Lowe CJ, Barker KL, Dewey M, et al. Effectiveness of physiotherapy exercise  
46 after knee arthroplasty for osteoarthritis: systematic review and meta-analysis of  
47 randomised controlled trials. *BMJ* 2007;**335**(7624):812.
- 48  
49  
50 41. Beswick AD, Wylde V, Gooberman-Hill R. Interventions for the prediction and  
51 management of chronic postsurgical pain after total knee replacement: systematic  
52 review of randomised controlled trials. *BMJ Open* 2015;**5**(5):e007387.
- 53  
54  
55 42. Wylde V, Beswick A, Dennis J, et al. Post-operative patient-related risk factors for  
56 chronic pain after total knee replacement: a systematic review. *BMJ Open* In press.
- 57  
58  
59  
60

- 1  
2  
3 43. Barker KL, Beard D, Price A, et al. COmmunity-based Rehabilitation after Knee  
4 Arthroplasty (CORKA): study protocol for a randomised controlled trial. *Trials*  
5 2016;**17**(1):501.  
6  
7  
8 44. Haroutiunian S, Nikolajsen L, Finnerup NB, et al. The neuropathic component in  
9 persistent postsurgical pain: A systematic literature review. *Pain* 2013;**154**(1):95-102.  
10  
11 45. Howells N, Murray J, Wylde V, et al. Persistent pain after knee replacement: do factors  
12 associated with pain vary with degree of patient dissatisfaction? *Osteoarthritis*  
13 *Cartilage* 2016;**24**(12):2061-68.  
14  
15 46. Mandalia V, Eyres K, Schranz P, et al. Evaluation of patients with a painful total knee  
16 replacement. *J Bone Joint Surg Br* 2008;**90**(3):265-71.  
17  
18 47. Toms AD, Mandalia V, Haigh R, et al. The management of patients with painful total  
19 knee replacement. *J Bone Joint Surg Br* 2009;**91**(2):143-50.  
20  
21 48. van Bussel CM, Stronks DL, Huygen FJ. Complex regional pain syndrome type I of the  
22 knee: a systematic literature review. *Eur J Pain* 2014;**18**(6):766-73.  
23  
24 49. Vissers MM, Bussmann JB, Verhaar JA, et al. Psychological factors affecting the  
25 outcome of total hip and knee arthroplasty: a systematic review. *Semin Arthritis*  
26 *Rheum* 2012;**41**(4):576-88.  
27  
28 50. Turk DC, Wilson HD, Cahana A. Treatment of chronic non-cancer pain. *Lancet*  
29 2011;**377**(9784):2226-35.  
30  
31 51. Lavand'homme P, Thienpont E. Pain after total knee arthroplasty: a narrative review  
32 focusing on the stratification of patients at risk for persistent pain. *Bone Joint J*  
33 2015;**97-B**(10 Suppl A):45-8.  
34  
35 52. Artz N, Elvers KT, Lowe CM, et al. Effectiveness of physiotherapy exercise following  
36 total knee replacement: systematic review and meta-analysis. *BMC musculoskeletal*  
37 *disorders* 2015;**16**:15.  
38  
39  
40  
41  
42  
43  
44  
45  
46  
47  
48  
49  
50  
51  
52  
53  
54  
55  
56  
57  
58  
59  
60

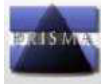

# PRISMA 2009 Checklist

| Section/topic                      | #  | Checklist item                                                                                                                                                                                                                                                                                              | Reported on page # |
|------------------------------------|----|-------------------------------------------------------------------------------------------------------------------------------------------------------------------------------------------------------------------------------------------------------------------------------------------------------------|--------------------|
| <b>TITLE</b>                       |    |                                                                                                                                                                                                                                                                                                             |                    |
| Title                              | 1  | Identify the report as a systematic review, meta-analysis, or both.                                                                                                                                                                                                                                         | 1                  |
| <b>ABSTRACT</b>                    |    |                                                                                                                                                                                                                                                                                                             |                    |
| Structured summary                 | 2  | Provide a structured summary including, as applicable: background; objectives; data sources; study eligibility criteria, participants, and interventions; study appraisal and synthesis methods; results; limitations; conclusions and implications of key findings; systematic review registration number. | 2-3                |
| <b>INTRODUCTION</b>                |    |                                                                                                                                                                                                                                                                                                             |                    |
| Rationale                          | 3  | Describe the rationale for the review in the context of what is already known.                                                                                                                                                                                                                              | 4                  |
| Objectives                         | 4  | Provide an explicit statement of questions being addressed with reference to participants, interventions, comparisons, outcomes, and study design (PICOS).                                                                                                                                                  | 4-5                |
| <b>METHODS</b>                     |    |                                                                                                                                                                                                                                                                                                             |                    |
| Protocol and registration          | 5  | Indicate if a review protocol exists, if and where it can be accessed (e.g., Web address), and, if available, provide registration information including registration number.                                                                                                                               | 5                  |
| Eligibility criteria               | 6  | Specify study characteristics (e.g., PICOS, length of follow-up) and report characteristics (e.g., years considered, language, publication status) used as criteria for eligibility, giving rationale.                                                                                                      | 5-6                |
| Information sources                | 7  | Describe all information sources (e.g., databases with dates of coverage, contact with study authors to identify additional studies) in the search and date last searched.                                                                                                                                  | 6                  |
| Search                             | 8  | Present full electronic search strategy for at least one database, including any limits used, such that it could be repeated.                                                                                                                                                                               | Appendix 2         |
| Study selection                    | 9  | State the process for selecting studies (i.e., screening, eligibility, included in systematic review, and, if applicable, included in the meta-analysis).                                                                                                                                                   | 6-7                |
| Data collection process            | 10 | Describe method of data extraction from reports (e.g., piloted forms, independently, in duplicate) and any processes for obtaining and confirming data from investigators.                                                                                                                                  | 6-7                |
| Data items                         | 11 | List and define all variables for which data were sought (e.g., PICOS, funding sources) and any assumptions and simplifications made.                                                                                                                                                                       | 6-7                |
| Risk of bias in individual studies | 12 | Describe methods used for assessing risk of bias of individual studies (including specification of whether this was done at the study or outcome level), and how this information is to be used in any data synthesis.                                                                                      | 7                  |
| Summary measures                   | 13 | State the principal summary measures (e.g., risk ratio, difference in means).                                                                                                                                                                                                                               | 7                  |
| Synthesis of results               | 14 | Describe the methods of handling data and combining results of studies, if done, including measures of consistency (e.g., $I^2$ ) for each meta-analysis. <a href="http://bmjopen.bmj.com/site/about/guidelines.xhtml">http://bmjopen.bmj.com/site/about/guidelines.xhtml</a>                               | 7                  |

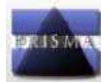

# PRISMA 2009 Checklist

| Section/topic                 | #  | Checklist item                                                                                                                                                                                           | Reported on page #         |
|-------------------------------|----|----------------------------------------------------------------------------------------------------------------------------------------------------------------------------------------------------------|----------------------------|
| Risk of bias across studies   | 15 | Specify any assessment of risk of bias that may affect the cumulative evidence (e.g., publication bias, selective reporting within studies).                                                             | 7                          |
| Additional analyses           | 16 | Describe methods of additional analyses (e.g., sensitivity or subgroup analyses, meta-regression), if done, indicating which were pre-specified.                                                         | 7                          |
| <b>RESULTS</b>                |    |                                                                                                                                                                                                          |                            |
| Study selection               | 17 | Give numbers of studies screened, assessed for eligibility, and included in the review, with reasons for exclusions at each stage, ideally with a flow diagram.                                          | Figure 1                   |
| Study characteristics         | 18 | For each study, present characteristics for which data were extracted (e.g., study size, PICOS, follow-up period) and provide the citations.                                                             | Table 1                    |
| Risk of bias within studies   | 19 | Present data on risk of bias of each study and, if available, any outcome level assessment (see item 12).                                                                                                | Table 2                    |
| Results of individual studies | 20 | For all outcomes considered (benefits or harms), present, for each study: (a) simple summary data for each intervention group (b) effect estimates and confidence intervals, ideally with a forest plot. | Figure 3, Appendix 3 and 4 |
| Synthesis of results          | 21 | Present results of each meta-analysis done, including confidence intervals and measures of consistency.                                                                                                  | Figure 3                   |
| Risk of bias across studies   | 22 | Present results of any assessment of risk of bias across studies (see Item 15).                                                                                                                          | Table 2                    |
| Additional analysis           | 23 | Give results of additional analyses, if done (e.g., sensitivity or subgroup analyses, meta-regression [see Item 16]).                                                                                    | Appendix 5                 |
| <b>DISCUSSION</b>             |    |                                                                                                                                                                                                          |                            |
| Summary of evidence           | 24 | Summarize the main findings including the strength of evidence for each main outcome; consider their relevance to key groups (e.g., healthcare providers, users, and policy makers).                     | 12-15                      |
| Limitations                   | 25 | Discuss limitations at study and outcome level (e.g., risk of bias), and at review-level (e.g., incomplete retrieval of identified research, reporting bias).                                            | 12-13                      |
| Conclusions                   | 26 | Provide a general interpretation of the results in the context of other evidence, and implications for future research.                                                                                  | 13-15                      |
| <b>FUNDING</b>                |    |                                                                                                                                                                                                          |                            |
| Funding                       | 27 | Describe sources of funding for the systematic review and other support (e.g., supply of data); role of funders for the systematic review.                                                               | 16                         |



## Appendix 2: Search terms

### MEDLINE (Ovid) (1946 to 15 November 2016)

- 1 randomized controlled trial/ or randomized controlled trial.pt.
- 2 controlled clinical trial.pt.
- 3 randomized.ab.
- 4 placebo.ab.
- 5 randomly.ab
- 6 trial.ab
- 7 randomised.tw
- 8 1 or 2 or 3 or 4 or 5 or 6 or 7
- 9 review/
- 10 'systematic review\$.mp
- 11 9 or 10
- 12 8 or 11
- 13 Arthroplasty, Replacement, Knee/
- 14 Knee Prosthesis/
- 15 (arthoplast\$ adj3 knee\$.mp. [mp=title, abstract, original title, name of substance word, subject heading word, keyword heading word, protocol supplementary concept word, rare disease supplementary concept word, unique identifier]
- 16 (knee\$ adj3 replac\$.mp. [mp=title, abstract, original title, name of substance word, subject heading word, keyword heading word, protocol supplementary concept word, rare disease supplementary concept word, unique identifier]
- 17 (knee adj3 implant\$.mp. [mp=title, abstract, original title, name of substance word, subject heading word, keyword heading word, protocol supplementary concept word, rare disease supplementary concept word, unique identifier]
- 18 13 or 14 or 15 or 16 or 17
- 19 12 and 18

### EMBASE (Ovid) (1980 to 15 November 2016)

- 1 Randomized controlled trial/ or Randomization/ or Single blind procedure/ or Double blind procedure/ or Crossover procedure/ or Placebo/ or Randomised controlled trial\$.tw. or Randomized controlled trial\$.tw. or RCT.tw. or Random allocation.tw. or Randomly allocated.tw. or Allocated randomly.tw. or (allocated adj2 random).tw. or Single blind\$.tw. or Double blind\$.tw. or ((treble or triple) adj blind\$.tw. or Placebo\$.tw.
- 2 "systematic review"/
- 3 meta analysis/



- 1  
2  
3 4 2 or 3  
4 5 1 or 4  
5  
6 6 knee arthroplasty/  
7 7 total knee arthroplasty/  
8  
9 8 knee prosthesis/  
10  
11 9 (knee\$ adj3 arthoplast\$).mp. [mp=title, abstract, heading word, drug trade name, original title, device  
12 manufacturer, drug manufacturer, device trade name, keyword, floating subheading]  
13  
14 10 (knee\$ adj3 replac\$).mp. [mp=title, abstract, heading word, drug trade name, original title, device  
15 manufacturer, drug manufacturer, device trade name, keyword, floating subheading]  
16  
17 11 (knee\$ adj3 implant\$).mp. [mp=title, abstract, heading word, drug trade name, original title, device  
18 manufacturer, drug manufacturer, device trade name, keyword, floating subheading]  
19  
20 12 6 or 7 or 8 or 9 or 10 or 11  
21  
22 13 5 and 12  
23

### **PsycINFO (Ovid) (inception [1806] to 15 November 2016)**

- 24  
25 1. (knee\$ adj3 arthoplast\$).mp. [mp=title, abstract, heading word, table of contents, key concepts, original title,  
26 tests & measures]  
27  
28 2. (knee\$ adj3 replac\$).mp. [mp=title, abstract, heading word, table of contents, key concepts, original title, tests  
29 & measures]  
30  
31 3. (knee\$ adj3 surg\$).mp. [mp=title, abstract, heading word, table of contents, key concepts, original title, tests  
32 & measures]  
33  
34 4. (knee\$ adj3 implant\$).mp. [mp=title, abstract, heading word, table of contents, key concepts, original title,  
35 tests & measures]  
36  
37 5. (knee adj3 prosthe\$).mp. [mp=title, abstract, heading word, table of contents, key concepts, original title, tests  
38 & measures]  
39  
40 6. 1 or 2 or 3 or 4 or 5  
41

### **The Cochrane Library (Wiley) (inception to 15 November 2016)**

- 42  
43  
44 #1 MeSH descriptor: [Knee Prosthesis] explode all trees  
45  
46 #2 MeSH descriptor: [Arthroplasty, Replacement, Knee] explode all trees  
47  
48 #3 arthoplast\* N3 knee\*  
49  
50 #4 knee\* N3 replac\*  
51  
52 #5 knee\* N3 implant\*  
53  
54 #6 #1 or #2 or #3 or #4 or #5  
55  
56  
57  
58  
59  
60

**CINAHL (EBSCOHOST) (1982 to 15 November 2016)**

- 1  
2  
3  
4  
5  
6  
7  
8  
9 S25 S15 AND S23 Limiters - Exclude MEDLINE records  
10  
11 S24 S15 AND S23  
12  
13 S23 S16 OR S17 OR S18 OR S19 OR S20 OR S21 OR S22  
14  
15 S22 knee\* N3 implant\*  
16  
17 S21 knee\* N3 arthoplast\*  
18  
19 S20 arthoplast\* N3 knee\*  
20  
21 S19 knee\* N3 replac\*  
22  
23 S18 "knee prosthes\*"  
24  
25 S17 MH "Knee surgery"  
26  
27 S16 MH "Arthroplasty, Replacement, Knee"  
28  
29 S15 (S8 OR S14)  
30  
31 S14 (S9 OR S10 OR S11 OR S12 OR S13)  
32  
33 S13 metaanalyses  
34  
35 S12 metaanalysis  
36  
37 S11 meta-analyses  
38  
39 S10 meta-analysis  
40  
41 S9 systematic review  
42  
43 S8 S1 OR S2 OR S3 OR S4 OR S5 OR S6 OR S7  
44  
45 S7 AB trial\$  
46  
47 S6 AB randomly  
48  
49 S5 AB randomised OR randomized  
50  
51 S4 (MH "clinical trials")  
52  
53 S3 clinical trials  
54  
55 S2 (MH "randomized controlled trials")  
56  
57 S1 randomized controlled trials  
58  
59  
60

### Appendix 3: Adverse event reporting and findings

| Publication                 | Adverse events assessment/definition                                                                                                                                                   | Results summary                                                                                                                                                                                                                                                                                                           |
|-----------------------------|----------------------------------------------------------------------------------------------------------------------------------------------------------------------------------------|---------------------------------------------------------------------------------------------------------------------------------------------------------------------------------------------------------------------------------------------------------------------------------------------------------------------------|
| Bruun-Olsen et al, 2013 [1] | None                                                                                                                                                                                   |                                                                                                                                                                                                                                                                                                                           |
| Buhagiar et al, 2017 [2]    | Postdischarge complication and adverse event data were collected until 1 year after surgery by self-report at follow-up visits and by a review of hospital electronic medical records. | Detailed breakdown of post-operative complications is provided in Table 3. There were no significant between-group differences in emergency department visits, readmissions and manipulations under anaesthetic.                                                                                                          |
| Chen et al, 2016 [3]        | None                                                                                                                                                                                   |                                                                                                                                                                                                                                                                                                                           |
| Fransen et al, 2017 [4]     | Adverse events defined as event resulting in readmission to the hospital or resulting in a medical intervention or reduced function for 3 or more days.                                | Intervention: 1 death, 24 hospital admissions (15 TKR related), 20 other adverse events<br><br>Control: 1 death, 16 hospital admissions (13 TKR related), 17 other adverse events                                                                                                                                         |
| Frost et al, 2002 [5]       | None                                                                                                                                                                                   |                                                                                                                                                                                                                                                                                                                           |
| Kauppila et al, 2010 [6]    | Not stated                                                                                                                                                                             | No adverse events due to the intervention were reported                                                                                                                                                                                                                                                                   |
| Ko et al, 2013 [7]          | Postoperative adverse events were monitored via treating therapists and documented by the blinded assessor.                                                                            | Detailed breakdown of post-operative adverse events provided in Appendix 1. Superficial wound infection, major infection, venous thrombotic embolism, neurovascular, TKR-related readmission and manipulation under anaesthetic similar between groups. No adverse events were associated with any of the treatment arms. |
| Kramer et al, 2003 [8]      | None                                                                                                                                                                                   |                                                                                                                                                                                                                                                                                                                           |
| Liebs et al, 2010 [9]       | Not stated                                                                                                                                                                             | Prevalence of postoperative complications was similar between groups.                                                                                                                                                                                                                                                     |
| Liebs et al, 2012 [10]      | Not stated                                                                                                                                                                             | 5 patients in early aquatic therapy group and 1 patient in the late aquatic therapy group admitted to hospital within 3 months of surgery.                                                                                                                                                                                |
| Minns Lowe et al, 2012 [11] | Not stated                                                                                                                                                                             | No adverse events                                                                                                                                                                                                                                                                                                         |
| Moffet et al, 2004 [12]     | Not stated                                                                                                                                                                             | No adverse events                                                                                                                                                                                                                                                                                                         |
| Monticone et al, 2013 [13]  | None                                                                                                                                                                                   |                                                                                                                                                                                                                                                                                                                           |
| Petterson et al, 2009 [14]  | Not stated                                                                                                                                                                             | No adverse events were related to the exercise intervention. Only 1 patient reported feeling dizzy and lightheaded                                                                                                                                                                                                        |

|                            |            |                                                                                                                                                                                                                                                         |
|----------------------------|------------|---------------------------------------------------------------------------------------------------------------------------------------------------------------------------------------------------------------------------------------------------------|
|                            |            | following the first NMES treatment.                                                                                                                                                                                                                     |
| Szots et al, 2016 [15]     | None       |                                                                                                                                                                                                                                                         |
| Vuorenmaa et al, 2014 [16] | Not stated | Intervention: 5 patients discontinued training due to pain (2 reported knee pain on operated side, 1 reported knee pain on the contralateral side, 1 reported back pain, and 1 reported hip pain), 1 patient had surgery due to reduced range of motion |

For peer review only

| Study                   | Results summary                                                                                                                                                                            |
|-------------------------|--------------------------------------------------------------------------------------------------------------------------------------------------------------------------------------------|
| Bruun-Olsen et al, 2013 | No significant difference in mean KOOS pain scores (p-value not reported)<br>Intervention: 82 (SD 21)<br>Control: 74 (SD 23)                                                               |
| Buhagiar et al, 2017    | No significant difference in median KOOS pain scores between groups (p-value not reported)<br>Intervention: 86 (IQR 74 to 97)<br>Control: 91 (IQR 78-98)                                   |
| Chen et al, 2016        | No significant difference in mean VAS pain scores (p-value not reported)<br>Intervention: 8.7 (SD 5.1)<br>Control: 9.3 (SD 5.5)                                                            |
| Fransen et al, 2017     | No significant difference in mean WOMAC pain scores (p=0.71)<br>Intervention: 2.6 (SE 0.2)<br>Control: 2.5 (SE 0.2)                                                                        |
| Frost et al, 2002       | No significant difference in mean OKS item 'pain on walking' scores (p=0.68)<br>Intervention: 1.6 (SD 0.8)<br>Control: 1.5 (SD 0.93)                                                       |
| Kauppila et al, 2010    | No significant difference in mean WOMAC pain scores (p=0.17)<br>Intervention: 23.5 (SD 22.3)<br>Control: 19.3 (SD 17.5)                                                                    |
| Ko et al, 2013          | No significant difference in mean WOMAC pain scores (p=0.79)<br>1:1 sessions: Median 3.8 (IQR 0.5-9.6)<br>Group sessions: Median 1.6 (IQR 0-7.5)<br>Home programme: Median 2.5 (IQR 0-9.5) |
| Kramer et al, 2003      | No significant difference in mean WOMAC pain scores (p-value and mean pain scores not reported)                                                                                            |
| Liebs et al, 2010       | No significant difference in mean WOMAC pain scores (p=0.454)<br>Intervention: 15.6 (SD 17.9)<br>Control: 13.0 (SD 14.9)                                                                   |
| Liebs et al, 2012       | No significant difference in mean WOMAC pain scores (p=0.334)<br>Intervention: 13.2 (SD 15.0)<br>Control: 17.4 (SD 22.4)                                                                   |
| Minns Lowe et al, 2012  | No statistical comparison of median KOOS pain scores (pilot study)<br>Intervention: 80.6 (IQ 36)<br>Control: 90.3 (IQ 33)                                                                  |
| Moffet et al, 2004      | No significant difference in mean WOMAC pain scores (p=0.161)<br>Intervention: 9.4 (SD 12.4)<br>Control: 11.8 (SD 13.0)                                                                    |
| Monticone et al, 2013   | Mean KOOS pain score significantly lower in intervention group (p<0.001)<br>Intervention: 87.35 (SD 11.71)<br>Control: 77.38 (SD 15.07)                                                    |
| Pettersen et al,        | No significant difference in mean KOS ADL item 'affect of pain on function' (p                                                                                                             |

| Study                 | Results summary                                                                                                                                                  |
|-----------------------|------------------------------------------------------------------------------------------------------------------------------------------------------------------|
| 2009                  | value not reported)<br>Intervention: 0.82 (SD not reported)<br>Control: 0.89 (SD not reported)                                                                   |
| Szots et al, 2016     | No significant difference in mean change in WOMAC pain scores (p=0.329)<br>Intervention: -25.9 (95% CI = -30.8, -21.0)<br>Control: -29.5 (95% CI = -35.2, -23.8) |
| Vuorenmaa et al, 2014 | No significant difference in mean change in WOMAC pain scores (p=0.70)<br>Intervention: -15 (95% CI -20 to -10)<br>Control: -14 (95% CI -19 to -9)               |

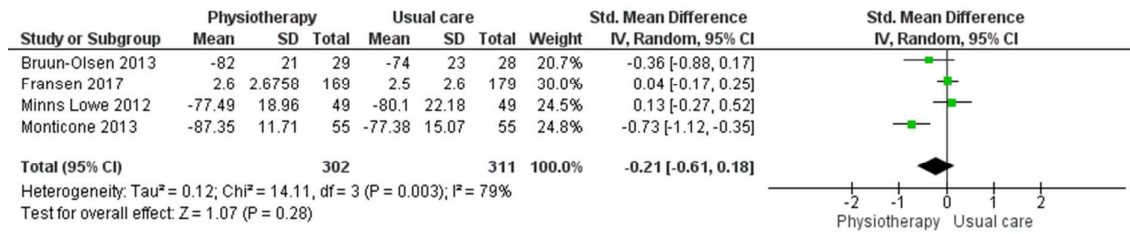

For peer review only

# BMJ Open

## The effectiveness of post-discharge intervention for reducing the severity of chronic pain after total knee replacement: Systematic review of randomised controlled trials

|                                 |                                                                                                                                                                                                                                                                                                |
|---------------------------------|------------------------------------------------------------------------------------------------------------------------------------------------------------------------------------------------------------------------------------------------------------------------------------------------|
| Journal:                        | <i>BMJ Open</i>                                                                                                                                                                                                                                                                                |
| Manuscript ID                   | bmjopen-2017-020368.R1                                                                                                                                                                                                                                                                         |
| Article Type:                   | Research                                                                                                                                                                                                                                                                                       |
| Date Submitted by the Author:   | 12-Dec-2017                                                                                                                                                                                                                                                                                    |
| Complete List of Authors:       | Wylde, Vikki; University of Bristol, Musculoskeletal Research Unit<br>Dennis, Jane; University of Bristol, Musculoskeletal Research Unit<br>Gooberman-Hill, Rachael; University of Bristol, School of Clinical Sciences<br>Beswick, Andrew; University of Bristol, School of Clinical Sciences |
| <b>Primary Subject Heading</b>: | Rehabilitation medicine                                                                                                                                                                                                                                                                        |
| Secondary Subject Heading:      | Surgery, Health services research                                                                                                                                                                                                                                                              |
| Keywords:                       | Total knee replacement, Chronic post-surgical pain, Prevention, Systematic review                                                                                                                                                                                                              |
|                                 |                                                                                                                                                                                                                                                                                                |

SCHOLARONE™  
Manuscripts



1  
2  
3 **The effectiveness of post-discharge intervention for reducing the severity of chronic**  
4 **pain after total knee replacement: Systematic review of randomised controlled trials**  
5  
6  
7

8  
9 Wylde V<sup>1,2</sup>, Dennis J<sup>1</sup>, Gooberman-Hill R<sup>1,2</sup>, Beswick AD<sup>1</sup>  
10

11  
12 <sup>1</sup>Musculoskeletal Research Unit, Translational Health Sciences, Bristol Medical School,  
13  
14 University of Bristol, UK  
15

16  
17 <sup>2</sup>National Institute for Health Research Bristol Biomedical Research Centre, University of  
18  
19 Bristol, UK  
20

21 **E-mail addresses**  
22

23  
24 Vikki Wylde: [v.wylde@bristol.ac.uk](mailto:v.wylde@bristol.ac.uk)  
25

26  
27 Jane Dennis: [jane.dennis@bristol.ac.uk](mailto:jane.dennis@bristol.ac.uk)  
28

29  
30 Rachael Gooberman-Hill: [r.goberman-hill@bristol.ac.uk](mailto:r.goberman-hill@bristol.ac.uk)  
31

32  
33 Andrew Beswick: [andy.beswick@bristol.ac.uk](mailto:andy.beswick@bristol.ac.uk)  
34  
35

36  
37 **Corresponding author**  
38

39 Dr Vikki Wylde, Musculoskeletal Research Unit, Translational Health Sciences, Bristol  
40  
41 Medical School, Learning and Research Building, Southmead Hospital, Bristol, BS10 5NB,  
42  
43 UK  
44

45 E-mail: [V.Wylde@bristol.ac.uk](mailto:V.Wylde@bristol.ac.uk), Telephone: +44 (0)117 414 7878  
46  
47  
48  
49  
50

51  
52 **Word count: 2744**  
53

54 Running title: Post-discharge interventions and chronic pain after TKR  
55  
56  
57

## ABSTRACT

### Objective

Approximately 20% of patients experience chronic pain after total knee replacement (TKR). The aim of this systematic review was to evaluate the effectiveness of post-discharge interventions commenced in the first three months after surgery in reducing the severity of chronic pain after TKR.

### Design

The protocol for this systematic review was registered on PROSPERO (CRD42017041382). MEDLINE, Embase, CINAHL, PsycINFO and *The Cochrane Library* were searched from inception to November 2016. Randomised controlled trials of post-discharge intervention which commenced in the first three months after TKR surgery were included. The primary outcome of the review was self-report pain severity at 12 months or longer after TKR. Risk of bias was assessed using the Cochrane risk-of-bias tool.

### Results

Seventeen trials with data from 2,485 randomised participants were included. The majority of trials evaluated physiotherapy interventions (n=13); other interventions included nurse-led interventions (n=2), neuromuscular electrical stimulation (n=1) and a multidisciplinary intervention (n=1). Opportunities for meta-analysis were limited by heterogeneity. No study found a difference in long-term pain severity between trial arms, with the exception of one trial which found home-based functional exercises aimed at managing kinesiophobia resulted in lower pain severity scores at 12 months post-operative compared to advice to stay active.

### Conclusion

1  
2  
3 This systematic review and narrative synthesis found no evidence that one type of  
4 physiotherapy intervention is more effective than another at reducing the severity of chronic  
5 pain after TKR. Further research is needed to evaluate non-physiotherapy interventions,  
6 including the provision of care as part of a stratified and multidisciplinary care package.  
7  
8  
9  
10

11  
12  
13  
14  
15 **Key words:** Total knee replacement, chronic post-surgical pain, prevention, systematic  
16 review  
17  
18  
19

### 20 **Strengths and limitations of this study**

21

- 22  
23 • This is the first systematic review to evaluate the effectiveness of post-discharge  
24 interventions delivered in the first three months after surgery in reducing the severity  
25 of chronic pain after total knee replacement.  
26  
27
- 28 • Synthesis of adverse events data was not possible because assessment and reporting  
29 was variable and often poor.  
30  
31
- 32 • We did not include studies that used a composite pain and function measure to assess  
33 pain outcome.  
34  
35  
36  
37  
38  
39  
40  
41  
42  
43  
44  
45  
46  
47  
48  
49  
50  
51  
52  
53  
54  
55  
56  
57  
58  
59  
60

## INTRODUCTION

Total knee replacement (TKR) is a common operation to provide pain relief, predominately due to osteoarthritis. Despite good outcomes for many, some patients report chronic pain in the months and years after TKR. Chronic post-surgical pain is defined as pain that is present or increases in intensity at  $\geq 3$  months after surgery [1]. In representative populations, unfavourable long-term pain outcomes have been reported by 10-34% of patients with TKR [2]. Patients with bothersome pain at  $\geq 3$  months after surgery are disappointed with their outcome [3 4]. Given the prevalence and impact of chronic pain, it is important to evaluate interventions that may optimise patients' outcomes after TKR.

During the hospital stay after TKR, rehabilitation focuses on regaining range of motion and improving mobility. After discharge, rehabilitation aims to enhance recovery, through supporting a person to regain function and quality of life, optimising pain relief and re-integration into social and personal environments [5]. While physiotherapy often focusses on functional health, another key outcome is the prevention of long-term pain [6]. Post-operative physiotherapy may be combined with other interventions to provide comprehensive, multidisciplinary and holistic rehabilitation [7]. A key step to improving patients' outcomes after TKR is to evaluate if early post-operative rehabilitation interventions can reduce the severity of chronic pain after TKR. Chronic pain is difficult to treat once established [8], and therefore it is important to evaluate the effectiveness of early post-operative interventions in reducing the severity of chronic pain.

The aim of this systematic review was to evaluate the effectiveness of post-discharge interventions delivered in the first three months after surgery for reducing the severity of chronic pain after TKR.

## METHODS

The review was registered on the international prospective register of systematic reviews (PROSPERO) on 17<sup>th</sup> January 2017 (registration number CRD42017041382). The review was conducted following guidance from the Cochrane Handbook [9] and reported in accordance with PRISMA guidelines [10] (Appendix 1).

### Eligibility criteria

Studies were eligible for inclusion in the review if they met the following criteria:

**Population:** Adults discharged from hospital after primary TKR predominantly for osteoarthritis.

**Intervention:** Any post-discharge intervention which commenced in the first three months after TKR surgery.

**Control:** Any, including no intervention, usual care, placebo or an alternative intervention.

**Outcomes:** The primary outcome was pain severity at 12 months or longer after TKR, as patient-reported levels of pain plateau by this time point [11 12]. Pain severity could be assessed using a patient-reported joint-specific pain measure (e.g. WOMAC or KOOS pain domains), a quality of life measure (e.g. SF-36 or SF-12) or a Visual Analogue Scale (VAS). The secondary outcome was adverse events.

**Study type:** Randomised controlled trials (RCTs).

### Information sources and searches

MEDLINE, Embase, CINAHL, PsycINFO and *The Cochrane Library* were searched from inception to 15th November 2016 (Appendix 2). No language restrictions were applied and relevant non-English articles were translated and included if appropriate. Studies reported

1  
2  
3 only as abstracts or that were unobtainable as full text copies using inter-library loans or  
4  
5 email contact with authors were excluded. Citations of key reviews and studies were checked  
6  
7 in ISI Web of Science.  
8  
9

## 10 **Screening**

11  
12 Records identified by searches were imported into Endnote X7 (Thomson Reuters) and  
13  
14 duplicates removed. From the searches, an Endnote database of all RCTs and systematic  
15  
16 reviews in TKR was established. Within this database, interventions conducted during the  
17  
18 post-operative period were identified. An initial screen for potential eligibility was  
19  
20 undertaken by one reviewer (ADB) to exclude articles that were clearly not relevant.  
21  
22 Subsequently, abstracts and full-text articles were screened independently by two reviewers  
23  
24 (VW and ADB or JD). Results of screening were compared, and any discrepancies were  
25  
26 resolved through further review of the full text articles and discussion between reviewers.  
27  
28 Reasons for exclusion were recorded.  
29  
30  
31

## 32 **Data extraction**

33  
34 Data from studies that met the eligibility criteria were extracted onto a standardised proforma  
35  
36 by one reviewer (VW). Data extraction was checked against source articles by a second  
37  
38 reviewer (JD). Extracted data comprised: country, date, participant characteristics, selection  
39  
40 criteria; intervention and control treatment; follow up intervals; losses to follow-up; primary  
41  
42 outcome; outcome data for pain; adverse events (any untoward medical occurrence in a  
43  
44 clinical study participant regardless of the causal relationship with the study treatment) and  
45  
46 information for risk of bias assessment. Any disagreements between reviewers were  
47  
48 discussed with a third reviewer (ADB) and consensus reached.  
49  
50  
51

52  
53 A single e-mail was sent to authors of studies with an appropriate follow-up period but no  
54  
55 pain outcome to enquire if an appropriate outcome was available. If a combined pain and  
56  
57

1  
2  
3 function outcome was reported, such as the OKS or the total WOMAC score, separate pain  
4 subscale data were requested. Authors were contacted when necessary for clarification  
5 purposes or to request unpublished relevant data. If a study reported data that were combined  
6 for knee and hip replacement patients, then disaggregated data for patients with TKR were  
7 requested. If this was not available, then the study was excluded.  
8  
9  
10  
11  
12

### 13 14 **Risk of bias assessment**

15  
16  
17 Potential sources of bias were assessed using the Cochrane risk of bias tool [9]. At the  
18 protocol stage, analysis was planned which included all studies, with sensitivity analyses  
19 conducted to exclude studies judged to be at high risk of bias.  
20  
21  
22  
23

### 24 **Strategy for data synthesis**

25  
26  
27 At the protocol stage, meta-analysis using RevMan 5 [13] was planned if two or more studies  
28 were identified with similar interventions and comparator groups and appropriate outcome  
29 data. If continuous pain outcomes were measured differently across studies, overall  
30 standardised mean differences and 95% confidence intervals would be calculated and  
31 presented alongside measures of heterogeneity ( $I^2$ ). Where possible, subgroup analyses were  
32 planned to explore the effectiveness of different intervention content and intensity, and  
33 different comparator interventions.  
34  
35  
36  
37  
38  
39  
40  
41  
42

43 Opportunities for pooling outcome data in meta-analysis were limited by heterogeneity. This  
44 included the content, duration and intensity of both the treatments in both the intervention  
45 and comparison group. For example, a number of the trials were pragmatic with the control  
46 group receiving 'usual care', which varied considerably between studies. Therefore, a  
47 narrative synthesis was performed.  
48  
49  
50  
51  
52  
53  
54  
55  
56  
57  
58  
59  
60

## RESULTS

Searches identified 7,954 articles. After detailed evaluation of full-text articles, 17 studies with 2,485 randomised participants were included [14-30] (Figure 1). Two included studies were published after the search dates, but were identified from protocols published within the search dates [15 17].

### Study characteristics

Table 1 provides an overview of study characteristics. Included studies were from Australia (n=3), Canada (n=2), Finland (n=2), Germany (n=2), United Kingdom (n=2), China (n=1), Denmark (n=1), Italy (n=1), Norway (n=1), Turkey (n=1) and United States of America (n=1). The number of centres was reported for 15 studies: eight studies were conducted in a single centre, three studies were conducted in two centres, and four studies were conducted in  $\geq 4$  centres. Sample sizes ranged from 34 to 422 participants, with a median of 117. All studies had two arms, with the exception of one three-arm trial [20]. Three studies were described as pilot or feasibility studies [16 18 24].

### Study quality

Risk of bias assessments for individual studies are displayed in Figure 2. All studies were at high risk of bias for blinding of participants and pain outcome assessment due to the nature of the intervention and the self-reporting of pain. Five studies were at high risk of bias due to incomplete outcome data and one due to selective outcome reporting.

### Outcomes assessment

The primary outcome was specified for 13 trials; this was function in eight trials; a composite of pain and function in four trials, and pain in one trial (Appendix 3). Pain severity was most commonly assessed using the WOMAC pain scale (n=9); other tools included the KOOS pain



1  
2  
3 scale (n=4), VAS (n=2), and single items from the OKS (n=1) and KOS ADL (n=1). Adverse  
4  
5 events were poorly described and reported in the majority of studies and therefore pooling of  
6  
7 harms data was not possible. A summary of adverse events findings is presented in Appendix  
8  
9 4. Pain was assessed at 12 months after TKR in 16 studies and at 14 months in one study. A  
10  
11 summary of results from the individual studies is provided in Appendix 3.  
12  
13

## 14 **Interventions**

15  
16  
17 The majority of studies evaluated physiotherapy interventions (n=13); other interventions  
18  
19 evaluated included nurse-led interventions (n=2), neuromuscular electrical stimulation  
20  
21 (NMES) (n=1) and a multidisciplinary intervention (n=1).  
22  
23

## 24 **Physiotherapy interventions**

25  
26  
27 Thirteen studies with 1,880 randomised patients evaluated the effectiveness of post-discharge  
28  
29 physiotherapy interventions. All interventions started within two months of surgery, with the  
30  
31 majority commencing within two weeks of surgery. In addition to all studies being at risk of  
32  
33 bias due to issues with blinding, risk of bias due to incomplete outcome data was evident for  
34  
35 four studies [18 22 23 25]. Seven studies compared physiotherapy interventions with usual  
36  
37 care or minimal care; interventions included a walking skills programme [14], group-based  
38  
39 circuit exercise classes [17], ergometer cycling [22], home-based functional rehabilitation  
40  
41 [24], clinic-based functional rehabilitation [25], home-based functional exercises aimed at  
42  
43 managing kinesiophobia [26], and delayed monitored home exercises [29]. Five studies  
44  
45 compare two forms of treatment including inpatient rehabilitation compared with home  
46  
47 exercise [15], home-based functional exercise and home-based traditional exercise [18], 1:1  
48  
49 physiotherapy and home-based rehabilitation [21], supervised and home-based physiotherapy  
50  
51 [30], early aquatic therapy and late aquatic therapy [23], and a three-arm trial comparing 1:1  
52  
53 physiotherapy, group-based circuit classes and a monitored home exercise programme [20].  
54  
55  
56  
57

1  
2  
3 Of the 13 studies, only one trial reported a difference in pain severity between groups;  
4 patients randomised to 6 months of home-based exercises aimed at managing kinesiophobia  
5 had lower pain severity scores at 12 months post-operative compared with patients who  
6 received general advice to stay active [26].  
7  
8  
9  
10

### 11 **Nurse-led interventions**

12  
13  
14  
15 Two studies with 319 randomised patients reported evaluation of a nurse-led intervention  
16 compared with no care or usual care. Except for issues relating to blinding, both studies were  
17 at low risk of bias. Both studies evaluated nurse-led structured telephone follow-up; one  
18 aimed to improve adherence to home exercise [16] and the other to provide information  
19 regarding well-being, integrity, prophylaxis, safety and other issues relevant to patients after  
20 TKR [28]. Pain outcome data (mean and standard deviations) were not available for latter  
21 study and therefore meta-analysis was not possible. Neither study found a difference in pain  
22 severity scores at 12 months post-operative between the intervention and control group.  
23  
24  
25  
26  
27  
28  
29  
30  
31  
32

### 33 **Other interventions**

34  
35  
36 Two studies reported evaluations of other interventions. Except for issues relating to blinding,  
37 both studies were at low risk of bias. One trial involving 86 patients compared a group-based  
38 multidisciplinary programme with usual care [19]. This 10-day programme involved  
39 physiotherapy, Nordic walking, relaxation strategies, and sessions with a psychologist, social  
40 worker, nutritionist and orthopaedic surgeon. Another trial with 200 patients, at high risk of  
41 bias due to incomplete outcome data and selective outcome reporting, evaluated a combined  
42 NMES and volitional strength training programme compared with volitional strength training  
43 program without NMES [27]. Both studies found no difference in pain severity scores at 12  
44 months post-operative between the intervention and control group.  
45  
46  
47  
48  
49  
50  
51  
52  
53  
54  
55  
56  
57  
58  
59  
60

### Ongoing research

In searches of databases and citation searches on ISI Web of Science we identified a number of published RCT protocols that are evaluating post-discharge interventions with a pain severity outcome at  $\geq 12$  months after TKR. Interventions being evaluated include a digital activity coaching system for home exercise [31], Wii-enhanced rehabilitation [32], group-based outpatient physiotherapy with an individualised element [33], multicomponent rehabilitation for patients at risk of a poor outcome [34] and physiotherapy for patients performing poorly at six weeks after TKR [35]. Some of these studies are now finished and findings are likely to be reported imminently.

### DISCUSSION

This systematic review aimed to evaluate the effectiveness of post-discharge interventions delivered in the first three months after surgery for reducing the severity of chronic pain after TKR. Interventions that predominately comprise physiotherapy have been evaluated in RCTs. In most studies, the control group received some form of physiotherapy care and therefore the aim of the trials was to compare the effectiveness of different types of physiotherapy, rather than comparing the effectiveness of physiotherapy to no care. A narrative synthesis of the evidence suggests that no physiotherapy intervention appears to be more effective than another at reducing the severity of chronic pain after TKR. However, findings from the trial of a 6 month home-based functional exercise programme aimed at managing kinesiophobia [26] compared to advice to stay active were encouraging and warrant further evaluation. Few studies have been conducted to evaluate the effectiveness of non-physiotherapy interventions at reducing chronic pain after TKR, and further research is needed.

1  
2  
3 There are a number of strengths and limitations to this systematic review. The main outcome  
4 of interest in this review was pain severity at  $\geq 12$  months after TKR. Although the primary  
5 outcome of many of the included studies was function, pain severity was an important  
6 secondary outcome in these studies. Studies that used a composite pain and function measure  
7 to assess outcome, for example the OKS or WOMAC, were excluded if authors were unable  
8 to provide pain subscales scores. Although this reduced the number of studies eligible for  
9 inclusion, this approach was taken because pain and function are distinct outcome domains,  
10 with different predictors and recovery trajectories [36 37]. The secondary outcome of this  
11 review was adverse events, to allow the synthesis of harms data. However, synthesis was not  
12 possible because assessment and reporting of adverse events was variable and often poor. The  
13 quality of adverse events reporting is a common issue in surgical trials [38], and evidence-  
14 based recommendations are needed to promote standardisation, improve quality and reduce  
15 heterogeneity of adverse events reporting in orthopaedic studies. A potential limitation of the  
16 included studies was that they were all at high risk of bias due to the lack of participant  
17 blinding for self-report pain. However, blinding of participants is rarely possible in RCTs of  
18 this nature. Also, it would be expected that the risk would arise from participants in the  
19 intervention group reporting less pain, which may potentially be an issue with shorter-term  
20 outcomes, but this was not evident from the longer-term follow-up of the studies included in  
21 this review.  
22  
23  
24  
25  
26  
27  
28  
29  
30  
31  
32  
33  
34  
35  
36  
37  
38  
39  
40  
41  
42  
43

44 This systematic review took a broad approach by evaluating the effectiveness of any type of  
45 post-discharge intervention that aimed to reduce the severity of chronic pain after TKR.  
46 Interventions that span the post-operative period may be delivered as part of a comprehensive  
47 peri-operative package of care, and these would not have been identified in this review;  
48 however, evaluations of the effectiveness of pre-operative and peri-operative interventions  
49 for reducing chronic pain severity are being conducted separately (CRD42017041382).  
50  
51  
52  
53  
54  
55  
56  
57

1  
2  
3 Previous systematic reviews of interventions to improve long-term outcomes after TKR have  
4 been conducted, but these have evaluated pre-operative interventions or have been narrower  
5 in focus. Systematic reviews of pre-operative interventions have found that exercise and  
6 education have a limited effect on improving long-term pain and function after TKR [39-43].  
7  
8 Previous systematic reviews of post-discharge interventions have focussed on physiotherapy,  
9 finding some evidence of short-term benefit but a lack of evidence to draw conclusions about  
10 long-term benefit [6 44 45]. One systematic review has evaluated interventions for the  
11 management of chronic pain after TKR, identifying only a single RCT of botulinum toxin A  
12 injections [46]. Our systematic review adds to this literature by providing evidence that no  
13 specific type of post-discharge physiotherapy intervention appears to be more effective than  
14 another at reducing the severity of chronic pain after TKR, although the positive impact of a  
15 home-based programme aimed at managing kinesiophobia compared with advice to stay  
16 active warrants further investigation.  
17  
18  
19  
20  
21  
22  
23  
24  
25  
26  
27  
28  
29  
30

31 The aim of this review was to evaluate the effectiveness of post-discharge interventions at  
32 reducing chronic pain severity after TKR. However, the primary aim of most trials included  
33 in the review was to improve functional ability after TKR. Only one trial had a primary  
34 outcome of pain severity [29], although a number of other trials assessed their primary  
35 outcome with a composite measure of pain and function [17 20 24 26]. However, pain  
36 severity was assessed as a secondary outcome in these trials and therefore it was expected  
37 that the intervention may reduce long-term pain. All but one study found that the intervention  
38 did not provide any benefit on long-term pain severity compared to the control group.  
39  
40 However, the treatment received in the control group, particularly in the physiotherapy trials,  
41 varied considerably between studies, including a different form or intensity of physiotherapy,  
42 provision of physiotherapy based on a needs assessment, delayed treatment or no treatment.  
43  
44 Therefore, it is not appropriate to draw conclusions on the effectiveness of any particular type  
45  
46  
47  
48  
49  
50  
51  
52  
53  
54  
55  
56  
57  
58  
59  
60

1  
2  
3 of physiotherapy intervention based on the findings of this review. However, the evidence  
4 does suggest that no type of physiotherapy intervention is more effective than another at  
5 reducing the severity of chronic pain after TKR. An important finding of this review is that  
6 only four trials have been conducted which have evaluated non-physiotherapy interventions,  
7 highlighting the need for more research in this field. In particular, further research with pain  
8 severity as the pain outcome is needed to ensure that RCTs are adequately powered to  
9 evaluate the effectiveness of post-discharge interventions on reducing chronic pain severity.  
10  
11  
12  
13  
14  
15  
16  
17

18 There are important considerations in the design and delivery of future post-discharge  
19 interventions that warrant further discussion. All the interventions included in this review  
20 were uniformly delivered to all patients, rather than just those patients who may be at most  
21 risk of poor outcome. Only 20% of patients will develop chronic pain after TKR [2] and  
22 delivering physiotherapy to all patients may reduce the ability to detect clinical benefit in  
23 terms of pain severity. In the future, interventions might be more effective if they include  
24 processes to identify patients at high risk of chronic pain and provide these patients with  
25 intensive and comprehensive interventions that have been specifically designed to reduce  
26 their risk of developing chronic pain. However, identifying high risk patients is challenging;  
27 pre-operative models to identify patients at risk of a poor outcome have low predictive power  
28 [36 37], and the evidence for post-operative risk factors is limited [47]. However, research is  
29 currently ongoing to evaluate whether providing a rehabilitation programme for patients at  
30 risk of a poor outcome [48] or are 'functioning poorly' at six weeks after TKR [35] can  
31 improve longer-term outcomes.  
32  
33  
34  
35  
36  
37  
38  
39  
40  
41  
42  
43  
44  
45  
46  
47  
48

49 Preventing chronic pain after TKR is challenging because of the complexity of this pain  
50 condition. Although chronic pain after TKR is not yet fully understood, the aetiology of this  
51 pain is multifactorial, including surgical factors, complex regional pain syndrome, pain  
52 sensitisation, neuropathic pain and psychosocial factors [49-54]. Therefore, an intervention  
53  
54  
55  
56  
57  
58  
59  
60

1  
2  
3 comprising a single treatment modality may be insufficient to address and reduce the causes  
4 of pain for all patients. As with the treatment of other chronic pain conditions, this highlights  
5 the importance of focused, individualised and multidisciplinary treatment [8 55]. Such an  
6 approach is being evaluated in an ongoing RCT of a care pathway for patients with chronic  
7 pain after TKR (ISRCTN92545361). Therefore, further research is needed to evaluate the  
8 effectiveness of providing stratified and multidisciplinary care packages for preventing  
9 chronic pain after TKR.  
10  
11  
12  
13  
14  
15  
16  
17

18 In conclusion, findings from this systematic review and narrative synthesis are that there is no  
19 evidence that one type of physiotherapy intervention is more effective than another at  
20 reducing the severity of chronic pain after TKR. Further research is needed to evaluate non-  
21 physiotherapy interventions, including the provision of care as part of stratified and  
22 multidisciplinary care package.  
23  
24  
25  
26  
27  
28  
29  
30  
31  
32  
33  
34  
35  
36  
37  
38  
39  
40  
41  
42  
43  
44  
45  
46  
47  
48  
49  
50  
51  
52  
53  
54  
55  
56  
57  
58  
59  
60

1  
2  
3 **FIGURE LEGENDS**  
4

5  
6 **Figure 1: Systematic review flow diagram**  
7

8 **Figure 2: Risk of bias assessment for individual studies**  
9  
10  
11  
12  
13  
14  
15  
16  
17  
18  
19  
20  
21  
22  
23  
24  
25  
26  
27  
28  
29  
30  
31  
32  
33  
34  
35  
36  
37  
38  
39  
40  
41  
42  
43  
44  
45  
46  
47  
48  
49  
50  
51  
52  
53  
54  
55  
56  
57  
58  
59  
60

For peer review only



## ACKNOWLEDGEMENTS

We would like to thank all the study authors who took the time to reply to our requests for further clarification or additional data.

## AUTHOR CONTRIBUTIONS

All authors contributed to the concept and design of the study. ADB, JD and VW contributed to the acquisition and analysis of data. VW drafted the article and ADB, JD and RGH revised it critically for important intellectual content. VW and ADB take responsibility for the integrity of the work as a whole, from inception to finished article.

## FUNDING

This article presents independent research funded by the National Institute for Health Research (NIHR) under its Programme Grants for Applied Research programme (RP-PG-0613-20001). The views expressed are those of the authors and not necessarily those of the NHS, the NIHR or the Department of Health. The funder had no involvement in the study design, data collection, data analysis, interpretation of data or writing of the manuscript.

This study was supported by the NIHR Biomedical Research Centre at the University Hospitals Bristol NHS Foundation Trust and the University of Bristol. The views expressed in this publication are those of the author(s) and not necessarily those of the NHS, the National Institute for Health Research or the Department of Health.

## COMPETING INTERESTS

The authors have no conflicts of interest to declare.

## DATA SHARING STATEMENT

No additional data are available.

**Table 1: Overview of study characteristics**

| Publication<br>Location<br>Date of study<br>Number of centres | Randomised<br>Mean age<br>% female      | Intervention treatment                                                                                                                                                                                                                           | Control treatment                                                                                                                                                        | Pain assessment<br>Adherence to treatment<br>Losses to follow-up                                                   |
|---------------------------------------------------------------|-----------------------------------------|--------------------------------------------------------------------------------------------------------------------------------------------------------------------------------------------------------------------------------------------------|--------------------------------------------------------------------------------------------------------------------------------------------------------------------------|--------------------------------------------------------------------------------------------------------------------|
| Bruun-Olsen et al, 2013<br>Norway<br>2008-2010<br>2 centres   | N=57(29:28)<br>68:69 years<br>62:50%    | Group-based physiotherapist-led walking skills programme (2-6 patients per group). Commenced 6 weeks after surgery. 12 sessions over 6-8 weeks.                                                                                                  | 1:1 usual physiotherapy care consisting of 12 individual physiotherapy sessions. Commenced 6 weeks after surgery. Twice weekly sessions until 12-14 weeks after surgery. | KOOS pain scale<br>28/29 completed intervention<br>28/28 received control treatment<br>6 (2:4) lost to follow-up   |
| Buhagiar et al, 2017<br>Australia<br>2012-2015<br>2 centres   | N=165(81:84)<br>67:67 years<br>69:68%   | Inpatient rehabilitation at rehabilitation facility with twice daily supervised sessions of 1:1 and group-based exercises. Commenced after hospital discharge for 10 days. Home exercise programme after discharge from rehabilitation facility. | Home exercise programme comprising of 2-3 group-based outpatient session to practice and progress exercises. Commenced 2 weeks after surgery.                            | KOOS pain scale<br>72/81 adhered to intervention<br>74/84 adhered to control treatment<br>6(2:4) lost to follow-up |
| Buker et al, 2014*<br>Turkey<br>2009-2011<br>1 centre         | N=34 (18:16)<br>64:68 years<br>89:94%   | 20 sessions of supervised physiotherapy and rehabilitation including range of motion and strengthening exercises, application of heat and TENS application. Five days a week for four weeks.                                                     | Home exercises including range of motion and strengthening exercise for one hour per day. Five days a week for four weeks.                                               | Pain VAS<br>Adherence not reported<br>Losses to follow-up not reported                                             |
| Chen et al, 2016<br>China<br>2013-2014<br>1 centre            | N=202(101:101)<br>66:67 years<br>63:67% | Structured telephone follow-up by nurse at 1, 3 and 6 weeks after hospital discharge to improve adherence to home exercise routine.                                                                                                              | No telephone follow-up                                                                                                                                                   | Pain VAS<br>Adherence not reported<br>15(7:8) lost to follow-up                                                    |
| Fransen et al, 2017<br>Australia<br>2009-2012                 | N=422(212:210)<br>64:65 years<br>54:52% | Group-based circuit exercise classes supervised by physiotherapist. Up to 6 patients per class. Commenced 6 weeks after surgery. Twice                                                                                                           | Usual physiotherapy care. 22% of participants reported 6 or more occasions of physiotherapy                                                                              | WOMAC pain scale<br>140/212 participants attended $\geq 12$ classes                                                |

1  
2  
3  
4  
5  
6  
7  
8  
9  
10  
11  
12  
13  
14  
15  
16  
17  
18  
19  
20  
21  
22  
23  
24  
25  
26  
27  
28  
29  
30  
31  
32  
33  
34  
35  
36  
37  
38  
39  
40  
41  
42  
43  
44  
45  
46  
47

|                                                                       |                                                    |                                                                                                                                                |                                                                                                                                                                                                                                                                                                                                                                                   |                                                                                                                                                                                                           |
|-----------------------------------------------------------------------|----------------------------------------------------|------------------------------------------------------------------------------------------------------------------------------------------------|-----------------------------------------------------------------------------------------------------------------------------------------------------------------------------------------------------------------------------------------------------------------------------------------------------------------------------------------------------------------------------------|-----------------------------------------------------------------------------------------------------------------------------------------------------------------------------------------------------------|
| 12 centres                                                            |                                                    | weekly sessions for at least 8 weeks.                                                                                                          | during the 6–12-week period after TKR                                                                                                                                                                                                                                                                                                                                             | 210/210 received control treatment<br>74(43:31) lost to follow-up                                                                                                                                         |
| Frost et al, 2002<br>UK<br>1995-1996<br>Not reported                  | N=47(23:24)<br>72:71 years<br>48:50%               | Home-based functional exercise. Commenced following discharge from hospital. Duration not reported.                                            | Home-based traditional exercise.                                                                                                                                                                                                                                                                                                                                                  | OKS item (pain on walking)<br>Adherence not reported<br>20 (7:13) lost to follow-up                                                                                                                       |
| Kauppila et al, 2010 <sup>s</sup><br>Finland<br>2002-2005<br>1 centre | N=86(44:42)<br>71:71 years<br>76:79%               | Group-based multidisciplinary rehabilitation programme. Up to 8 patients per group. Commenced 2-4 months after surgery for 10 days.            | Usual physiotherapy care. Supervised exercise programme at 2 month outpatient visit, with provision of further rehabilitation based on needs assessment.                                                                                                                                                                                                                          | WOMAC pain scale<br>44/44 attended intervention<br>42:42 received control treatment<br>11 (8:3) lost to follow-up                                                                                         |
| Ko et al, 2013<br>Australia<br>2008-2010<br>3 arm trial<br>4 centres  | N=<br>249(85:84:80)<br>67:68:67 years<br>68:60:61% | 1:1 physiotherapy with home-based sessions. Commenced 2 weeks after surgery. Twice weekly 1:1 and home-based sessions over 6 weeks.            | 1.) Group-based circuit classes supervised by physiotherapist with home-based sessions. Up to 8 patients per class. Commenced 2 weeks after surgery. Twice weekly group and home-based sessions over 6 weeks.<br><br>2.) Monitored home programme, 2 1:1 physiotherapy sessions and 1 telephone follow-up call. Commenced 2 weeks after surgery. 4 sessions per week for 6 weeks. | WOMAC pain scale<br>80% participants attended 9 or more 1:1 sessions, 77% attended 9 or more group sessions, 83% attended both sessions in monitored home programme group.<br>16(7:3:6) lost to follow-up |
| Kramer et al, 2003<br>Canada<br>Not reported<br>Not reported          | N=160(80:80)<br>68:69 years<br>59:55%              | 1:1 clinic-based rehabilitation programme with home exercise programme. Commenced 2 weeks after surgery. Up to 2 sessions a week for 10 weeks. | Home-based rehabilitation, monitored by telephone calls from physiotherapist. Commenced 2 weeks after surgery. At least 1 telephone call in weeks 2-6 and 1 call in                                                                                                                                                                                                               | WOMAC pain scale<br>76/80 received intervention<br>78/80 received control treatment<br>26 (15:22) lost to follow-up                                                                                       |

|                                                                |                                         |                                                                                                                                                                                           |                                                                                                                                                      |                                                                                                                                                  |
|----------------------------------------------------------------|-----------------------------------------|-------------------------------------------------------------------------------------------------------------------------------------------------------------------------------------------|------------------------------------------------------------------------------------------------------------------------------------------------------|--------------------------------------------------------------------------------------------------------------------------------------------------|
|                                                                |                                         |                                                                                                                                                                                           | weeks 7-12.                                                                                                                                          |                                                                                                                                                  |
| Liebs et al, 2010*<br>Germany<br>2005-2006<br>5 centres        | N=159(85:74)<br>70:70 years<br>73:70%   | Ergometer cycling supervised by physiotherapist. Commenced 2 weeks after surgery. 3 sessions a week for at least 3 weeks.                                                                 | No ergometer cycling.                                                                                                                                | WOMAC pain scale<br>Adherence not reported<br>33(15:18) lost to follow-up                                                                        |
| Liebs et al, 2012*<br>Germany<br>2003-2004<br>2 centres        | N=185(87:98)<br>69:71 years<br>70:73%   | Early aquatic therapy. Commenced 6 days after surgery. 3 times a week up to 5 <sup>th</sup> week post-operative.                                                                          | Late aquatic therapy. Commenced 14 days after surgery. 3 times a week up to 5 <sup>th</sup> week post-operative.                                     | WOMAC pain scale<br>Adherence not reported<br>41(18:23) lost to follow-up                                                                        |
| Minns Lowe et al,<br>2012<br>UK<br>2006-2008<br>1 centre       | N=107 (56:51)<br>68:71 years<br>57:59%  | Home-based functional rehabilitation with 2 visits from physiotherapist at 2 weeks and 6-8 weeks after hospital discharge. Twice daily exercises for at least 3 months.                   | Usual physiotherapy care involving provision of an exercise booklet, with outpatient physiotherapy on a needs only basis. No additional home visits. | KOOS pain scale<br>46/56 patients received 2 visits<br>47/51 received control treatment<br>9 (7:2) lost to follow-up                             |
| Moffet et al, 2004<br>[25]<br>Canada<br>1997-1999<br>5 centres | N=77(38:39)<br>67:69 years<br>63:56%    | Functional rehabilitation programme with individualised home exercises. Commenced at 2 months after surgery. 12 supervised sessions over 6-8 weeks.                                       | Usual physiotherapy care, which included supervised home rehabilitation visits for 26% of patients.                                                  | WOMAC pain scale<br>38/38 participated in 12 sessions<br>39/39 received control treatment<br>8(0:8) lost to follow-up                            |
| Monticone et al,<br>2010-2013<br>Italy<br>1 centre             | N=110(55:55)<br>67:68 years<br>65:62%   | Home-based functional exercises aimed at managing kinesiophobia, with monthly phone calls to encourage adherence. Commenced after hospital discharge. Twice weekly sessions for 6 months. | No physiotherapy, advice to stay active.                                                                                                             | KOOS pain scale<br>Adherence not reported<br>0 lost to follow-up                                                                                 |
| Petterson et al, 2009<br>USA<br>200-2005<br>1 centre           | N=200(100:100)<br>65:65 years<br>47:45% | Combined neuromuscular electric stimulation (NMES) and volitional strength training programme. Commenced 3-4 weeks after surgery. 2 or 3 sessions a week for 6 weeks.                     | Volitional strength training program without NMES.                                                                                                   | KOS ADL item (effect of pain on function)<br>84/100 completed intervention<br>97/100 completed control treatment<br>51 (32:19) lost to follow-up |
| Szots et al, 2016<br>Denmark                                   | N=117(59:58)<br>67:68 years             | Two nurse-led structured telephone follow-up calls. Telephone calls at 4 days and 14 days                                                                                                 | No telephone follow-up.                                                                                                                              | WOMAC pain scale<br>54/59 patients had both telephone                                                                                            |

1  
2  
3  
4  
5  
6  
7  
8  
9  
10  
11  
12  
13  
14  
15  
16  
17  
18  
19  
20  
21  
22  
23  
24  
25  
26  
27  
28  
29  
30  
31  
32  
33  
34  
35  
36  
37  
38  
39  
40  
41  
42  
43  
44  
45  
46  
47

|                                                                 |                                       |                                                                                                                                                              |                                                                                 |                                                                                                                                                                                   |
|-----------------------------------------------------------------|---------------------------------------|--------------------------------------------------------------------------------------------------------------------------------------------------------------|---------------------------------------------------------------------------------|-----------------------------------------------------------------------------------------------------------------------------------------------------------------------------------|
| 2013<br>1 centre                                                | 61:67%                                | after hospital discharge.                                                                                                                                    |                                                                                 | follow-up calls<br>54/58 received control treatment<br>9(5:4) lost to follow-up                                                                                                   |
| Vuorenmaa et al,<br>2014 **<br>Finland<br>2008-2010<br>1 centre | N=108(53:55)<br>69:69 years<br>57:65% | Delayed monitored home exercises, with guidance from physiotherapist at 2, 3 and 6 months post-operative. Commenced at 2 months after surgery for 12 months. | Usual care, which involved no additional guidance from 2 months post-operative. | WOMAC pain scale<br>72% of patients performed the training sessions at least twice per week in the first 6 months<br>53/53 received control treatment<br>4(2:2) lost to follow-up |

\* 24 month follow-up also conducted but data from 12 month follow-up included in table to be consistent with follow-up period of other studies

\*\* Follow-up at 14 months post-operative

§ Pain-specific outcome data was provided by the authors for a previous review [56] and was used again in this review

**REFERENCES**

1. Werner MU, Kongsgaard UE. I. Defining persistent post-surgical pain: is an update required? *Br J Anaesth* 2014;**113**(1):1-4.
2. Beswick AD, Wylde V, Gooberman-Hill R, et al. What proportion of patients report long-term pain after total hip or knee replacement for osteoarthritis? A systematic review of prospective studies in unselected patients. *BMJ Open* 2012;**2**(1):e000435.
3. Scott CE, Howie CR, MacDonald D, et al. Predicting dissatisfaction following total knee replacement: a prospective study of 1217 patients. *J Bone Joint Surg Br* 2010;**92**(9):1253-8.
4. Jeffery AE, Wylde V, Blom AW, et al. "It's there and I'm stuck with it": patients' experiences of chronic pain following total knee replacement surgery. *Arthritis Care Res (Hoboken)* 2011;**63**(2):286-92.
5. Artz N, Dixon S, Wylde V, et al. Physiotherapy provision following discharge after total hip and total knee replacement: a survey of current practice at high-volume NHS hospitals in England and Wales. *Musculoskeletal Care* 2013;**11**(1):31-8.
6. Artz N, Elvers K, Minns Lowe C, et al. Effectiveness of physiotherapy exercise following total knee replacement: systematic review and meta-analysis. *BMC Musculoskeletal Disorders* 2015;**16**(15).
7. Khan F, Ng L, Gonzalez S, et al. Multidisciplinary rehabilitation programmes following joint replacement at the hip and knee in chronic arthropathy. *Cochrane Database Syst Rev* 2008(2):CD004957.
8. Turk DC, Wilson HD, Cahana A. Treatment of chronic non-cancer pain. *Lancet* 2011;**377**(9784):2226-35.
9. Higgins J, Green SE. *Cochrane Handbook for Systematic Reviews of Interventions* Version 5.1.0 [updated March 2011]. The Cochrane Collaboration, 2011. Available from [www.cochrane-handbook.org](http://www.cochrane-handbook.org), 2011.
10. Moher D, Liberati A, Tetzlaff J, et al. Preferred reporting items for systematic reviews and meta-analyses: the PRISMA statement. *BMJ* 2009;**339**:b2535.
11. Lenguerrand E, Wylde V, Gooberman-Hill R, et al. Trajectories of Pain and Function after Primary Hip and Knee Arthroplasty: The ADAPT Cohort Study. *PLoS One* 2016;**11**(2):e0149306.

12. Kennedy DM, Stratford PW, Hanna SE, et al. Modeling early recovery of physical function following hip and knee arthroplasty. *BMC Musculoskelet Disord* 2006;**7**:100.
13. Review Manager. (RevMan) [Computer program]. Version 5.3. Copenhagen: The Nordic Cochrane Centre, The Cochrane Collaboration. 2014.
14. Bruun-Olsen V, Heiberg KE, Wahl AK, et al. The immediate and long-term effects of a walking-skill program compared to usual physiotherapy care in patients who have undergone total knee arthroplasty (TKA): a randomized controlled trial. *Disability and rehabilitation* 2013;**35**(23):2008-15.
15. Buhagiar MA, Naylor JM, Harris IA, et al. Effect of Inpatient Rehabilitation vs a Monitored Home-Based Program on Mobility in Patients With Total Knee Arthroplasty: The HIHO Randomized Clinical Trial. *JAMA* 2017;**317**(10):1037-46.
16. Chen M, Li P, Lin F. Influence of structured telephone follow-up on patient compliance with rehabilitation after total knee arthroplasty. *Patient Preference and Adherence* 2016;**10**:257-64.
17. Fransen M, Nairn L, Bridgett L, et al. Post-Acute Rehabilitation After Total Knee Replacement: A Multicenter Randomized Clinical Trial Comparing Long-Term Outcomes. *Arthritis Care Res (Hoboken)* 2017;**69**(2):192-200.
18. Frost H, Lamb SE, Robertson S. A randomized controlled trial of exercise to improve mobility and function after elective knee arthroplasty. Feasibility, results and methodological difficulties. *Clinical rehabilitation* 2002;**16**(2):200-9.
19. Kauppila AM, Kyllonen E, Ohtonen P, et al. Multidisciplinary rehabilitation after primary total knee arthroplasty: a randomized controlled study of its effects on functional capacity and quality of life. *Clinical rehabilitation* 2010;**24**(5):398-411.
20. Ko V, Naylor J, Harris I, et al. One-to-one therapy is not superior to group or home-based therapy after total knee arthroplasty: a randomized, superiority trial. *The Journal of bone and joint surgery. American volume* 2013;**95**(21):1942-9.
21. Kramer JF, Speechley M, Bourne R, et al. Comparison of clinic- and home-based rehabilitation programs after total knee arthroplasty. *Clinical orthopaedics and related research* 2003(410):225-34.
22. Liebs TR, Herzberg W, Ruther W, et al. Ergometer cycling after hip or knee replacement surgery: a randomized controlled trial. *The Journal of bone and joint surgery. American volume* 2010;**92**(4):814-22.



- 1  
2  
3 23. Liebs T, Herzberg W, R  ther W, et al. Multicenter randomized controlled trial comparing  
4 early versus late aquatic therapy after total hip or knee arthroplasty. Archives of  
5 physical medicine and rehabilitation 2012; 93(2).  
6  
7 [http://onlinelibrary.wiley.com/o/cochrane/clcentral/articles/334/CN-](http://onlinelibrary.wiley.com/o/cochrane/clcentral/articles/334/CN-00832334/frame.html)  
8 [00832334/frame.html](http://onlinelibrary.wiley.com/o/cochrane/clcentral/articles/334/CN-00832334/frame.html)  
9  
10  
11 <http://ac.els-cdn.com/S0003999311008434/1-s2.0-S0003999311008434->  
12 [main.pdf?\\_tid=41aa00ce-f508-11e6-b06b-](http://ac.els-cdn.com/S0003999311008434/1-s2.0-S0003999311008434-main.pdf?_tid=41aa00ce-f508-11e6-b06b-00000aab0f27&acdnt=1487332829_31eb2562ac20096dc09cc02ed9cf1f7e)  
13 [00000aab0f27&acdnt=1487332829\\_31eb2562ac20096dc09cc02ed9cf1f7e.](http://ac.els-cdn.com/S0003999311008434/1-s2.0-S0003999311008434-main.pdf?_tid=41aa00ce-f508-11e6-b06b-00000aab0f27&acdnt=1487332829_31eb2562ac20096dc09cc02ed9cf1f7e)  
14  
15  
16 24. Minns Lowe CJ, Barker KL, Holder R, et al. Comparison of postdischarge physiotherapy  
17 versus usual care following primary total knee arthroplasty for osteoarthritis: an  
18 exploratory pilot randomized clinical trial. Clinical rehabilitation 2012;**26**(7):629-41.  
19  
20 25. Moffet H, Collet JP, Shapiro SH, et al. Effectiveness of intensive rehabilitation on  
21 functional ability and quality of life after first total knee arthroplasty: A single-blind  
22 randomized controlled trial. Archives of physical medicine and rehabilitation  
23 2004;**85**(4):546-56.  
24  
25  
26 26. Monticone M, Ferrante S, Rocca B, et al. Home-based functional exercises aimed at  
27 managing kinesiophobia contribute to improving disability and quality of life of  
28 patients undergoing total knee arthroplasty: a randomized controlled trial. Archives of  
29 physical medicine and rehabilitation 2013;**94**(2):231-9.  
30  
31  
32 27. Petterson SC, Mizner RL, Stevens JE, et al. Improved function from progressive  
33 strengthening interventions after total knee arthroplasty: a randomized clinical trial  
34 with an imbedded prospective cohort. Arthritis and rheumatism 2009;**61**(2):174-83.  
35  
36  
37 28. Sz  ts K, Konradsen H, Solgaard S, et al. Long-term effects of telephone follow-up after  
38 total knee arthroplasty. Journal of Nursing Education and Practice 2016;**6**(7):151-54.  
39  
40  
41 29. Vuorenmaa M, Ylinen J, Piitulainen K, et al. Efficacy of a 12-month, monitored home  
42 exercise programme compared with normal care commencing 2 months after total  
43 knee arthroplasty: a randomized controlled trial. Journal of rehabilitation medicine  
44 2014;**46**(2):166-72.  
45  
46  
47 30. Buker N, Akkaya S, Akkaya N, et al. Comparison of effects of supervised physiotherapy  
48 and a standardized home program on functional status in patients with total knee  
49 arthroplasty: a prospective study. J Phys Ther Sci 2014;**26**(10):1531-6.  
50  
51  
52 31. Harmelink KEM, Zeegers A, Tonis TM, et al. The effectiveness of the use of a digital  
53 activity coaching system in addition to a two-week home-based exercise program in  
54  
55  
56  
57  
58  
59  
60



- 1  
2  
3 patients after total knee arthroplasty: study protocol for a randomized controlled trial.  
4 BMC Musculoskelet Disord 2017;**18**(1):290.  
5
- 6 32. Negus JJ, Cawthorne DP, Chen JS, et al. Patient outcomes using Wii-enhanced  
7 rehabilitation after total knee replacement - the TKR-POWER study. Contemp Clin  
8 Trials 2015;**40**:47-53.  
9
- 10 33. Wylde V, Artz N, Marques E, et al. Effectiveness and cost-effectiveness of outpatient  
11 physiotherapy after knee replacement for osteoarthritis: study protocol for a  
12 randomised controlled trial. Trials 2016;**17**(1):289.  
13
- 14 34. Barker KL, Beard D, Price A, et al. COmmunity-based Rehabilitation after Knee  
15 Arthroplasty (CORKA): Study protocol for a randomised controlled trial. Trials  
16 2016;**17**(1):no pagination.  
17
- 18 35. Simpson AH, Hamilton DF, Beard DJ, et al. Targeted rehabilitation to improve outcome  
19 after total knee replacement (TRIO): study protocol for a randomised controlled trial.  
20 Trials 2014;**15**:44.  
21
- 22 36. Judge A, Arden NK, Cooper C, et al. Predictors of outcomes of total knee replacement  
23 surgery. Rheumatology (Oxford) 2012;**51**(10):1804-13.  
24
- 25 37. Lopez-Olivo MA, Landon GC, Siff SJ, et al. Psychosocial determinants of outcomes in  
26 knee replacement. Ann Rheum Dis 2011;**70**(10):1775-81.  
27
- 28 38. Wylde V, Dennis J, Beswick AD, et al. Systematic review of management of chronic pain  
29 after surgery. British Journal of Surgery 2017;**104**(10):1293-306.  
30
- 31 39. Blom AW, Artz N, Beswick AD, et al. Improving patients' experience and outcome of  
32 total joint replacement: the RESTORE programme. NIHR Journals Library.  
33 Southampton (UK), 2016.  
34
- 35 40. Peer MA, Rush R, Gallacher PD, et al. Pre-surgery exercise and post-operative physical  
36 function of people undergoing knee replacement surgery: A systematic review and  
37 meta-analysis of randomized controlled trials. J Rehabil Med 2017;**49**(4):304-15.  
38
- 39 41. Jordan RW, Smith NA, Chahal GS, et al. Enhanced education and physiotherapy before  
40 knee replacement; is it worth it? A systematic review. Physiotherapy  
41 2014;**100**(4):305-12.  
42
- 43 42. Wang L, Lee M, Zhang Z, et al. Does preoperative rehabilitation for patients planning to  
44 undergo joint replacement surgery improve outcomes? A systematic review and meta-  
45 analysis of randomised controlled trials. BMJ Open 2016;**6**(2):e009857.  
46  
47  
48  
49  
50  
51  
52  
53  
54  
55  
56  
57  
58  
59  
60

- 1  
2  
3 43. Chesham RA, Shanmugam S. Does preoperative physiotherapy improve postoperative,  
4 patient-based outcomes in older adults who have undergone total knee arthroplasty? A  
5 systematic review. *Physiother Theory Pract* 2017;**33**(1):9-30.  
6  
7  
8 44. Minns Lowe CJ, Barker KL, Dewey M, et al. Effectiveness of physiotherapy exercise  
9 after knee arthroplasty for osteoarthritis: systematic review and meta-analysis of  
10 randomised controlled trials. *BMJ* 2007;**335**(7624):812.  
11  
12 45. Florez-Garcia M, Garcia-Perez F, Curbelo R, et al. Efficacy and safety of home-based  
13 exercises versus individualized supervised outpatient physical therapy programs after  
14 total knee arthroplasty: a systematic review and meta-analysis. *Knee Surg Sports*  
15 *Traumatol Arthrosc* 2017;**25**(11):3340-53.  
16  
17 46. Beswick AD, Wylde V, Goberman-Hill R. Interventions for the prediction and  
18 management of chronic postsurgical pain after total knee replacement: systematic  
19 review of randomised controlled trials. *BMJ Open* 2015;**5**(5):e007387.  
20  
21 47. Wylde V, Beswick A, Dennis J, et al. Post-operative patient-related risk factors for  
22 chronic pain after total knee replacement: a systematic review. *BMJ Open* In press.  
23  
24 48. Barker KL, Beard D, Price A, et al. COmmunity-based Rehabilitation after Knee  
25 Arthroplasty (CORKA): study protocol for a randomised controlled trial. *Trials*  
26 2016;**17**(1):501.  
27  
28 49. Haroutiunian S, Nikolajsen L, Finnerup NB, et al. The neuropathic component in  
29 persistent postsurgical pain: A systematic literature review. *Pain* 2013;**154**(1):95-102.  
30  
31 50. Howells N, Murray J, Wylde V, et al. Persistent pain after knee replacement: do factors  
32 associated with pain vary with degree of patient dissatisfaction? *Osteoarthritis*  
33 *Cartilage* 2016;**24**(12):2061-68.  
34  
35 51. Mandalia V, Eyres K, Schranz P, et al. Evaluation of patients with a painful total knee  
36 replacement. *J Bone Joint Surg Br* 2008;**90**(3):265-71.  
37  
38 52. Toms AD, Mandalia V, Haigh R, et al. The management of patients with painful total  
39 knee replacement. *J Bone Joint Surg Br* 2009;**91**(2):143-50.  
40  
41 53. van Bussel CM, Stronks DL, Huygen FJ. Complex regional pain syndrome type I of the  
42 knee: a systematic literature review. *Eur J Pain* 2014;**18**(6):766-73.  
43  
44 54. Vissers MM, Bussmann JB, Verhaar JA, et al. Psychological factors affecting the  
45 outcome of total hip and knee arthroplasty: a systematic review. *Semin Arthritis*  
46 *Rheum* 2012;**41**(4):576-88.  
47  
48  
49  
50  
51  
52  
53  
54  
55  
56  
57  
58  
59  
60

- 1  
2  
3 55. Lavand'homme P, Thienpont E. Pain after total knee arthroplasty: a narrative review  
4 focusing on the stratification of patients at risk for persistent pain. Bone Joint J  
5 2015;**97-B**(10 Suppl A):45-8.  
6  
7  
8 56. Artz N, Elvers KT, Lowe CM, et al. Effectiveness of physiotherapy exercise following  
9 total knee replacement: systematic review and meta-analysis. BMC musculoskeletal  
10 disorders 2015;**16**:15.  
11  
12  
13  
14  
15  
16  
17  
18  
19  
20  
21  
22  
23  
24  
25  
26  
27  
28  
29  
30  
31  
32  
33  
34  
35  
36  
37  
38  
39  
40  
41  
42  
43  
44  
45  
46  
47  
48  
49  
50  
51  
52  
53  
54  
55  
56  
57  
58  
59  
60

For peer review only

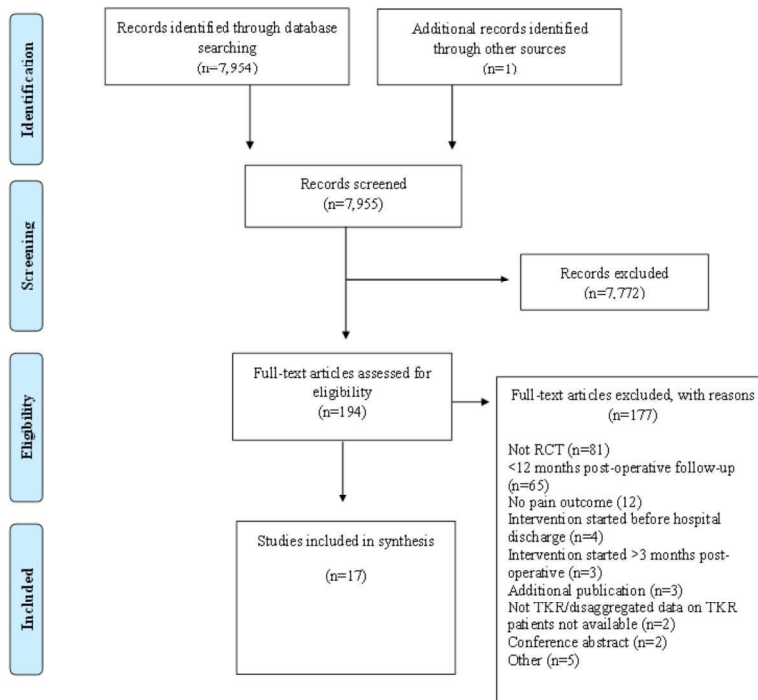

Figure 1: Systematic review flow diagram

254x190mm (300 x 300 DPI)

|                  | Random sequence generation (selection bias) | Allocation concealment (selection bias) | Blinding of participants and personnel (performance bias) | Blinding of outcome assessment (detection bias) | Incomplete outcome data (attrition bias) | Selective reporting (reporting bias) | Other bias |
|------------------|---------------------------------------------|-----------------------------------------|-----------------------------------------------------------|-------------------------------------------------|------------------------------------------|--------------------------------------|------------|
| Bruun-Olsen 2013 | +                                           | +                                       | -                                                         | -                                               | +                                        | +                                    | +          |
| Buhagiar 2017    | +                                           | +                                       | -                                                         | -                                               | +                                        | +                                    | +          |
| Büker 2014       | ?                                           | ?                                       | -                                                         | -                                               | ?                                        | ?                                    | +          |
| Chen 2016        | +                                           | +                                       | -                                                         | -                                               | +                                        | ?                                    | +          |
| Fransen 2017     | +                                           | +                                       | -                                                         | -                                               | +                                        | +                                    | +          |
| Frost 2002       | +                                           | ?                                       | -                                                         | -                                               | -                                        | ?                                    | +          |
| Kauppila 2010    | +                                           | +                                       | -                                                         | -                                               | +                                        | +                                    | +          |
| Ko 2013          | +                                           | +                                       | -                                                         | -                                               | +                                        | +                                    | +          |
| Kramer 2003      | ?                                           | ?                                       | -                                                         | -                                               | +                                        | +                                    | +          |
| Liebs 2010       | +                                           | +                                       | -                                                         | -                                               | -                                        | +                                    | +          |
| Liebs 2012       | +                                           | +                                       | -                                                         | -                                               | -                                        | ?                                    | +          |
| Minns Lowe 2012  | +                                           | +                                       | -                                                         | -                                               | +                                        | +                                    | +          |
| Moffet 2004      | +                                           | +                                       | -                                                         | -                                               | -                                        | ?                                    | +          |
| Monticone 2013   | +                                           | +                                       | -                                                         | -                                               | +                                        | ?                                    | +          |
| Petterson 2009   | ?                                           | ?                                       | -                                                         | -                                               | -                                        | -                                    | +          |
| Szots 2016       | +                                           | +                                       | -                                                         | -                                               | +                                        | +                                    | +          |
| Vuormaa 2014     | +                                           | +                                       | -                                                         | -                                               | +                                        | +                                    | +          |

Figure 2: Risk of bias assessment for individual studies

211x535mm (300 x 300 DPI)

## Appendix 1: PRISMA checklist

| Section/topic                      | #  | Checklist item                                                                                                                                                                                                                                                                                              | Reported on page # |
|------------------------------------|----|-------------------------------------------------------------------------------------------------------------------------------------------------------------------------------------------------------------------------------------------------------------------------------------------------------------|--------------------|
| <b>TITLE</b>                       |    |                                                                                                                                                                                                                                                                                                             |                    |
| Title                              | 1  | Identify the report as a systematic review, meta-analysis, or both.                                                                                                                                                                                                                                         | 1                  |
| <b>ABSTRACT</b>                    |    |                                                                                                                                                                                                                                                                                                             |                    |
| Structured summary                 | 2  | Provide a structured summary including, as applicable: background; objectives; data sources; study eligibility criteria, participants, and interventions; study appraisal and synthesis methods; results; limitations; conclusions and implications of key findings; systematic review registration number. | 2-3                |
| <b>INTRODUCTION</b>                |    |                                                                                                                                                                                                                                                                                                             |                    |
| Rationale                          | 3  | Describe the rationale for the review in the context of what is already known.                                                                                                                                                                                                                              | 4                  |
| Objectives                         | 4  | Provide an explicit statement of questions being addressed with reference to participants, interventions, comparisons, outcomes, and study design (PICOS).                                                                                                                                                  | 4-5                |
| <b>METHODS</b>                     |    |                                                                                                                                                                                                                                                                                                             |                    |
| Protocol and registration          | 5  | Indicate if a review protocol exists, if and where it can be accessed (e.g., Web address), and, if available, provide registration information including registration number.                                                                                                                               | 5                  |
| Eligibility criteria               | 6  | Specify study characteristics (e.g., PICOS, length of follow-up) and report characteristics (e.g., years considered, language, publication status) used as criteria for eligibility, giving rationale.                                                                                                      | 5-6                |
| Information sources                | 7  | Describe all information sources (e.g., databases with dates of coverage, contact with study authors to identify additional studies) in the search and date last searched.                                                                                                                                  | 6                  |
| Search                             | 8  | Present full electronic search strategy for at least one database, including any limits used, such that it could be repeated.                                                                                                                                                                               | Appendix 2         |
| Study selection                    | 9  | State the process for selecting studies (i.e., screening, eligibility, included in systematic review, and, if applicable, included in the meta-analysis).                                                                                                                                                   | 6-7                |
| Data collection process            | 10 | Describe method of data extraction from reports (e.g., piloted forms, independently, in duplicate) and any processes for obtaining and confirming data from investigators.                                                                                                                                  | 6-7                |
| Data items                         | 11 | List and define all variables for which data were sought (e.g., PICOS, funding sources) and any assumptions and simplifications made.                                                                                                                                                                       | 6-7                |
| Risk of bias in individual studies | 12 | Describe methods used for assessing risk of bias of individual studies (including specification of whether this was done at the study or outcome level), and how this information is to be used in any data synthesis.                                                                                      | 7                  |
| Summary measures                   | 13 | State the principal summary measures (e.g., risk ratio, difference in means).                                                                                                                                                                                                                               | 7                  |
| Synthesis of results               | 14 | Describe the methods of handling data and combining results of studies, if done, including measures of consistency (e.g., $I^2$ ) for each meta-analysis.                                                                                                                                                   | 7                  |

**Appendix 1: PRISMA checklist**

| Section/topic                 | #  | Checklist item                                                                                                                                                                                           | Reported on page #         |
|-------------------------------|----|----------------------------------------------------------------------------------------------------------------------------------------------------------------------------------------------------------|----------------------------|
| Risk of bias across studies   | 15 | Specify any assessment of risk of bias that may affect the cumulative evidence (e.g., publication bias, selective reporting within studies).                                                             | 7                          |
| Additional analyses           | 16 | Describe methods of additional analyses (e.g., sensitivity or subgroup analyses, meta-regression), if done, indicating which were pre-specified.                                                         | 7                          |
| <b>RESULTS</b>                |    |                                                                                                                                                                                                          |                            |
| Study selection               | 17 | Give numbers of studies screened, assessed for eligibility, and included in the review, with reasons for exclusions at each stage, ideally with a flow diagram.                                          | Figure 1                   |
| Study characteristics         | 18 | For each study, present characteristics for which data were extracted (e.g., study size, PICOS, follow-up period) and provide the citations.                                                             | Table 1                    |
| Risk of bias within studies   | 19 | Present data on risk of bias of each study and, if available, any outcome level assessment (see item 12).                                                                                                | Table 2                    |
| Results of individual studies | 20 | For all outcomes considered (benefits or harms), present, for each study: (a) simple summary data for each intervention group (b) effect estimates and confidence intervals, ideally with a forest plot. | Figure 3, Appendix 3 and 4 |
| Synthesis of results          | 21 | Present results of each meta-analysis done, including confidence intervals and measures of consistency.                                                                                                  | N/A                        |
| Risk of bias across studies   | 22 | Present results of any assessment of risk of bias across studies (see Item 15).                                                                                                                          | Table 2                    |
| Additional analysis           | 23 | Give results of additional analyses, if done (e.g., sensitivity or subgroup analyses, meta-regression [see Item 16]).                                                                                    | N/A                        |
| <b>DISCUSSION</b>             |    |                                                                                                                                                                                                          |                            |
| Summary of evidence           | 24 | Summarize the main findings including the strength of evidence for each main outcome; consider their relevance to key groups (e.g., healthcare providers, users, and policy makers).                     | 12-15                      |
| Limitations                   | 25 | Discuss limitations at study and outcome level (e.g., risk of bias), and at review-level (e.g., incomplete retrieval of identified research, reporting bias).                                            | 12-13                      |
| Conclusions                   | 26 | Provide a general interpretation of the results in the context of other evidence, and implications for future research.                                                                                  | 13-15                      |
| <b>FUNDING</b>                |    |                                                                                                                                                                                                          |                            |
| Funding                       | 27 | Describe sources of funding for the systematic review and other support (e.g., supply of data); role of funders for the systematic review.                                                               | 16                         |

## Appendix 2: Search terms

### MEDLINE (Ovid) (1946 to 15 November 2016)

- 1 randomized controlled trial/ or randomized controlled trial.pt.
- 2 controlled clinical trial.pt.
- 3 randomized.ab.
- 4 placebo.ab.
- 5 randomly.ab
- 6 trial.ab
- 7 randomised.tw
- 8 1 or 2 or 3 or 4 or 5 or 6 or 7
- 9 review/
- 10 'systematic review\$.mp
- 11 9 or 10
- 12 8 or 11
- 13 Arthroplasty, Replacement, Knee/
- 14 Knee Prosthesis/
- 15 (arthoplast\$ adj3 knee\$.mp. [mp=title, abstract, original title, name of substance word, subject heading word, keyword heading word, protocol supplementary concept word, rare disease supplementary concept word, unique identifier]
- 16 (knee\$ adj3 replac\$.mp. [mp=title, abstract, original title, name of substance word, subject heading word, keyword heading word, protocol supplementary concept word, rare disease supplementary concept word, unique identifier]
- 17 (knee adj3 implant\$.mp. [mp=title, abstract, original title, name of substance word, subject heading word, keyword heading word, protocol supplementary concept word, rare disease supplementary concept word, unique identifier]
- 18 13 or 14 or 15 or 16 or 17
- 19 12 and 18

### EMBASE (Ovid) (1980 to 15 November 2016)

- 1 Randomized controlled trial/ or Randomization/ or Single blind procedure/ or Double blind procedure/ or Crossover procedure/ or Placebo/ or Randomised controlled trial\$.tw. or Randomized controlled trial\$.tw. or RCT.tw. or Random allocation.tw. or Randomly allocated.tw. or Allocated randomly.tw. or (allocated adj2 random).tw. or Single blind\$.tw. or Double blind\$.tw. or ((treble or triple) adj blind\$.tw. or Placebo\$.tw.
- 2 "systematic review"/
- 3 meta analysis/



- 1  
2  
3 4 2 or 3  
4  
5 5 1 or 4  
6 6 knee arthroplasty/  
7  
8 7 total knee arthroplasty/  
9  
10 8 knee prosthesis/  
11 9 (knee\$ adj3 arthoplast\$).mp. [mp=title, abstract, heading word, drug trade name, original title, device  
12 manufacturer, drug manufacturer, device trade name, keyword, floating subheading]  
13  
14 10 (knee\$ adj3 replac\$).mp. [mp=title, abstract, heading word, drug trade name, original title, device  
15 manufacturer, drug manufacturer, device trade name, keyword, floating subheading]  
16  
17 11 (knee\$ adj3 implant\$).mp. [mp=title, abstract, heading word, drug trade name, original title, device  
18 manufacturer, drug manufacturer, device trade name, keyword, floating subheading]  
19  
20 12 6 or 7 or 8 or 9 or 10 or 11  
21  
22 13 5 and 12  
23  
24

### **PsycINFO (Ovid) (inception [1806] to 15 November 2016)**

- 25  
26  
27 1. (knee\$ adj3 arthoplast\$).mp. [mp=title, abstract, heading word, table of contents, key concepts, original title,  
28 tests & measures]  
29  
30 2. (knee\$ adj3 replac\$).mp. [mp=title, abstract, heading word, table of contents, key concepts, original title, tests  
31 & measures]  
32  
33 3. (knee\$ adj3 surg\$).mp. [mp=title, abstract, heading word, table of contents, key concepts, original title, tests  
34 & measures]  
35  
36 4. (knee\$ adj3 implant\$).mp. [mp=title, abstract, heading word, table of contents, key concepts, original title,  
37 tests & measures]  
38  
39 5. (knee adj3 prosthe\$).mp. [mp=title, abstract, heading word, table of contents, key concepts, original title, tests  
40 & measures]  
41  
42 6. 1 or 2 or 3 or 4 or 5  
43

### **The Cochrane Library (Wiley) (inception to 15 November 2016)**

- 44  
45  
46  
47 #1 MeSH descriptor: [Knee Prosthesis] explode all trees  
48  
49 #2 MeSH descriptor: [Arthroplasty, Replacement, Knee] explode all trees  
50  
51 #3 arthoplast\* N3 knee\*  
52  
53 #4 knee\* N3 replac\*  
54  
55 #5 knee\* N3 implant\*  
56  
57 #6 #1 or #2 or #3 or #4 or #5  
58  
59  
60

**CINAHL (EBSCOHOST) (1982 to 15 November 2016)**

- 1  
2  
3  
4  
5  
6  
7  
8  
9  
10 S25 S15 AND S23 Limiters - Exclude MEDLINE records  
11 S24 S15 AND S23  
12  
13 S23 S16 OR S17 OR S18 OR S19 OR S20 OR S21 OR S22  
14  
15 S22 knee\* N3 implant\*  
16  
17 S21 knee\* N3 arthoplast\*  
18 S20 arthoplast\* N3 knee\*  
19  
20 S19 knee\* N3 replac\*  
21  
22 S18 "knee prosthes\*"  
23  
24 S17 MH "Knee surgery"  
25 S16 MH "Arthroplasty, Replacement, Knee"  
26  
27 S15 (S8 OR S14)  
28 S14 (S9 OR S10 OR S11 OR S12 OR S13)  
29  
30 S13 metaanalyses  
31  
32 S12 metaanalysis  
33  
34 S11 meta-analyses  
35 S10 meta-analysis  
36  
37 S9 systematic review  
38  
39 S8 S1 OR S2 OR S3 OR S4 OR S5 OR S6 OR S7  
40  
41 S7 AB trial\$  
42 S6 AB randomly  
43  
44 S5 AB randomised OR randomized  
45 S4 (MH "clinical trials")  
46  
47 S3 clinical trials  
48  
49 S2 (MH "randomized controlled trials")  
50  
51 S1 randomized controlled trials  
52  
53  
54  
55  
56  
57  
58  
59  
60

## Appendix 3: Trial results summary

| Study                   | Primary aim of the study                                                                                                                                                | Primary outcome (and measure)                      | Results summary                                                                                                                                                                                                                                 |
|-------------------------|-------------------------------------------------------------------------------------------------------------------------------------------------------------------------|----------------------------------------------------|-------------------------------------------------------------------------------------------------------------------------------------------------------------------------------------------------------------------------------------------------|
| Buker et al, 2014       | Determine the functional differences between patients who were treated with supervised physiotherapy or a standardized home program and perform a cost analysis.        | Not specified                                      | <p>No significant difference in mean pain VAS scores (p-value not reported)</p> <p>Rest pain<br/>Intervention: 0.44 (SD 0.51)<br/>Control: 0.37 (SD 0.80)</p> <p>Activity pain<br/>Intervention: 3.11 (SD 1.96)<br/>Control: 2.50 (SD 1.77)</p> |
| Bruun-Olsen et al, 2013 | To examine the immediate and long-term effects of a walking-skill program compared with usual physiotherapy care.                                                       | Walking distance (6 minute walk test)              | <p>No significant difference in mean KOOS pain scores (p-value not reported)</p> <p>Intervention: 82 (SD 21)<br/>Control: 74 (SD 23)</p>                                                                                                        |
| Buhagiar et al, 2017    | To determine if 10 days of inpatient rehabilitation followed by a monitored home-based program provided greater improvements than a monitored home-based program alone. | Walking distance (6 minute walk test)              | <p>No significant difference in median KOOS pain scores between groups (p-value not reported)</p> <p>Intervention: 86 (IQR 74 to 97)<br/>Control: 91 (IQR 78-98)</p>                                                                            |
| Chen et al, 2016        | To assess the impact of structured telephone reinforcement on patient compliance with home exercises.                                                                   | Not specified (pilot study)                        | <p>No significant difference in mean VAS pain scores (p-value not reported)</p> <p>Intervention: 8.7 (SD 5.1)<br/>Control: 9.3 (SD 5.5)</p>                                                                                                     |
| Fransen et al, 2017     | To evaluate the long-term benefit of providing a post-acute, class-based outpatient exercise program compared                                                           | Pain and function (WOMAC pain and function scales) | <p>No significant difference in mean WOMAC pain scores (p=0.71)</p> <p>Intervention: 2.6 (SE 0.2)</p>                                                                                                                                           |

### Appendix 3: Trial results summary

| Study                | Primary aim of the study                                                                                                                                                                           | Primary outcome (and measure)         | Results summary                                                                                                                                                                            |
|----------------------|----------------------------------------------------------------------------------------------------------------------------------------------------------------------------------------------------|---------------------------------------|--------------------------------------------------------------------------------------------------------------------------------------------------------------------------------------------|
|                      | with current usual rehabilitation care.                                                                                                                                                            |                                       | Control: 2.5 (SE 0.2)                                                                                                                                                                      |
| Frost et al, 2002    | To assess the feasibility of comparing traditional exercise regimes with a more functional and dynamic approach.                                                                                   | Not specified (feasibility study)     | No significant difference in mean OKS item 'pain on walking' scores (p=0.68)<br>Intervention: 1.6 (SD 0.8)<br>Control: 1.5 (SD 0.93)                                                       |
| Kauppila et al, 2010 | To examine whether a multidisciplinary rehabilitation programme can improve functional recovery and quality of life and reduce the use of rehabilitation services compared with conventional care. | Function (WOMAC function scale)       | No significant difference in mean WOMAC pain scores (p=0.17)<br>Intervention: 23.5 (SD 22.3)<br>Control: 19.3 (SD 17.5)                                                                    |
| Ko et al, 2013       | To determine whether center-based, one-to-one physical therapy provides superior outcomes compared with group-based therapy or a simple monitored home-based program.                              | Pain and function (Oxford Knee Score) | No significant difference in mean WOMAC pain scores (p=0.79)<br>1:1 sessions: Median 3.8 (IQR 0.5-9.6)<br>Group sessions: Median 1.6 (IQR 0-7.5)<br>Home programme: Median 2.5 (IQR 0-9.5) |
| Kramer et al, 2003   | To compare clinic-based rehabilitation delivered in outpatient physical therapy clinics and home-based rehabilitation monitored by a physical therapist via periodic telephone calls.              | Not specified                         | No significant difference in mean WOMAC pain scores (p-value and mean pain scores not reported)                                                                                            |
| Liebs et al, 2010    | Evaluate the effect of ergometer cycling on health-related quality of life and patient satisfaction.                                                                                               | Function (WOMAC function scale)       | No significant difference in mean WOMAC pain scores (p=0.454)<br>Intervention: 15.6 (SD 17.9)<br>Control: 13.0 (SD 14.9)                                                                   |
| Liebs et al, 2012    | To evaluate if the timing of aquatic                                                                                                                                                               | Function (WOMAC function scale)       | No significant difference in mean                                                                                                                                                          |

### Appendix 3: Trial results summary

| Study                  | Primary aim of the study                                                                                                                                                                                                                       | Primary outcome (and measure)                                                          | Results summary                                                                                                                                                               |
|------------------------|------------------------------------------------------------------------------------------------------------------------------------------------------------------------------------------------------------------------------------------------|----------------------------------------------------------------------------------------|-------------------------------------------------------------------------------------------------------------------------------------------------------------------------------|
|                        | therapy influences clinical outcomes.                                                                                                                                                                                                          |                                                                                        | WOMAC pain scores (p=0.334)<br>Intervention: 13.2 (SD 15.0)<br>Control: 17.4 (SD 22.4)                                                                                        |
| Minns Lowe et al, 2012 | To evaluate a pilot trial of a postdischarge physiotherapy intervention to improve patient function versus usual physiotherapy.                                                                                                                | Pain and function (Oxford Knee Score)                                                  | No statistical comparison of median KOOS pain scores (pilot study)<br>Intervention: 80.6 (IQ 36)<br>Control: 90.3 (IQ 33)                                                     |
| Moffet et al, 2004     | To evaluate the effectiveness of a new intensive functional rehabilitation program on functional ability and quality of life.                                                                                                                  | Walking distance (6 minute walk test)                                                  | No significant difference in mean WOMAC pain scores (p=0.161)<br>Intervention: 9.4 (SD 12.4)<br>Control: 11.8 (SD 13.0)                                                       |
| Monticone et al, 2013  | To compare the improvement in disability, kinesiophobia, pain, and quality of life obtained by means of home-based functional exercises aimed at managing kinesiophobia with advice to stay active after discharge from a rehabilitation unit. | Pain and function (KOOS)                                                               | Mean KOOS pain score significantly lower in intervention group (p<0.001)<br>Intervention: 87.35 (SD 11.71)<br>Control: 77.38 (SD 15.07)                                       |
| Pettersen et al, 2009  | To determine the effectiveness of progressive quadriceps strengthening with or without neuromuscular electrical stimulation (NMES).                                                                                                            | Quadriceps strength and volitional muscle activation (burst superimposition technique) | No significant difference in mean KOS ADL item 'affect of pain on function' (p value not reported)<br>Intervention: 0.82 (SD not reported)<br>Control: 0.89 (SD not reported) |
| Szots et al, 2016      | To evaluate the effects of structured nurse-managed telephone follow-up.                                                                                                                                                                       | Function (WOMAC function scale)                                                        | No significant difference in mean change in WOMAC pain scores (p=0.329)<br>Intervention: -25.9 (95% CI = -30.8, -                                                             |

### Appendix 3: Trial results summary

| Study                 | Primary aim of the study                                                                 | Primary outcome (and measure) | Results summary                                                                                                                                        |
|-----------------------|------------------------------------------------------------------------------------------|-------------------------------|--------------------------------------------------------------------------------------------------------------------------------------------------------|
|                       |                                                                                          |                               | 21.0)<br>Control: -29.5 (95% CI = -35.2, -23.8)                                                                                                        |
| Vuorenmaa et al, 2014 | To evaluate the efficacy of a delayed home exercise programme compared with normal care. | Pain (WOMAC pain scale)       | No significant difference in mean change in WOMAC pain scores (p=0.70)<br><br>Intervention: -15 (95% CI -20 to -10)<br>Control: -14 (95% CI -19 to -9) |

#### Appendix 4: Adverse event reporting and findings

| Publication             | Adverse events assessment/definition                                                                                                                                                   | Results summary                                                                                                                                                                                                                                                                                                           |
|-------------------------|----------------------------------------------------------------------------------------------------------------------------------------------------------------------------------------|---------------------------------------------------------------------------------------------------------------------------------------------------------------------------------------------------------------------------------------------------------------------------------------------------------------------------|
| Buker et al, 2014       | None                                                                                                                                                                                   |                                                                                                                                                                                                                                                                                                                           |
| Bruun-Olsen et al, 2013 | None                                                                                                                                                                                   |                                                                                                                                                                                                                                                                                                                           |
| Buhagiar et al, 2017    | Postdischarge complication and adverse event data were collected until 1 year after surgery by self-report at follow-up visits and by a review of hospital electronic medical records. | Detailed breakdown of post-operative complications is provided in Table 3. There were no significant between-group differences in emergency department visits, readmissions and manipulations under anaesthetic.                                                                                                          |
| Chen et al, 2016        | None                                                                                                                                                                                   |                                                                                                                                                                                                                                                                                                                           |
| Fransen et al, 2017     | Adverse events defined as event resulting in readmission to the hospital or resulting in a medical intervention or reduced function for 3 or more days.                                | Intervention: 1 death, 24 hospital admissions (15 TKR related), 20 other adverse events<br><br>Control: 1 death, 16 hospital admissions (13 TKR related), 17 other adverse events                                                                                                                                         |
| Frost et al, 2002       | None                                                                                                                                                                                   |                                                                                                                                                                                                                                                                                                                           |
| Kauppila et al, 2010    | Not stated                                                                                                                                                                             | No adverse events due to the intervention were reported                                                                                                                                                                                                                                                                   |
| Ko et al, 2013          | Postoperative adverse events were monitored via treating therapists and documented by the blinded assessor.                                                                            | Detailed breakdown of post-operative adverse events provided in Appendix 1. Superficial wound infection, major infection, venous thrombotic embolism, neurovascular, TKR-related readmission and manipulation under anaesthetic similar between groups. No adverse events were associated with any of the treatment arms. |
| Kramer et al, 2003      | None                                                                                                                                                                                   |                                                                                                                                                                                                                                                                                                                           |
| Liebs et al, 2010       | Not stated                                                                                                                                                                             | Prevalence of postoperative complications was similar between groups.                                                                                                                                                                                                                                                     |
| Liebs et al, 2012       | Not stated                                                                                                                                                                             | 5 patients in early aquatic therapy group and 1 patient in the late aquatic therapy group admitted to hospital within 3 months of surgery.                                                                                                                                                                                |
| Minns Lowe et al, 2012  | Not stated                                                                                                                                                                             | No adverse events                                                                                                                                                                                                                                                                                                         |
| Moffet et al, 2004      | Not stated                                                                                                                                                                             | No adverse events                                                                                                                                                                                                                                                                                                         |
| Monticone et al, 2013   | None                                                                                                                                                                                   |                                                                                                                                                                                                                                                                                                                           |
| Petterson et al, 2009   | Not stated                                                                                                                                                                             | No adverse events were related to the                                                                                                                                                                                                                                                                                     |

|                       |            |                                                                                                                                                                                                                                                         |
|-----------------------|------------|---------------------------------------------------------------------------------------------------------------------------------------------------------------------------------------------------------------------------------------------------------|
|                       |            | exercise intervention. Only 1 patient reported feeling dizzy and lightheaded following the first NMES treatment.                                                                                                                                        |
| Szots et al, 2016     | None       |                                                                                                                                                                                                                                                         |
| Vuorenmaa et al, 2014 | Not stated | Intervention: 5 patients discontinued training due to pain (2 reported knee pain on operated side, 1 reported knee pain on the contralateral side, 1 reported back pain, and 1 reported hip pain), 1 patient had surgery due to reduced range of motion |



# BMJ Open

## The effectiveness of post-discharge intervention for reducing the severity of chronic pain after total knee replacement: Systematic review of randomised controlled trials

|                                 |                                                                                                                                                                                                                                                                                                |
|---------------------------------|------------------------------------------------------------------------------------------------------------------------------------------------------------------------------------------------------------------------------------------------------------------------------------------------|
| Journal:                        | <i>BMJ Open</i>                                                                                                                                                                                                                                                                                |
| Manuscript ID                   | bmjopen-2017-020368.R2                                                                                                                                                                                                                                                                         |
| Article Type:                   | Research                                                                                                                                                                                                                                                                                       |
| Date Submitted by the Author:   | 16-Jan-2018                                                                                                                                                                                                                                                                                    |
| Complete List of Authors:       | Wylde, Vikki; University of Bristol, Musculoskeletal Research Unit<br>Dennis, Jane; University of Bristol, Musculoskeletal Research Unit<br>Gooberman-Hill, Rachael; University of Bristol, School of Clinical Sciences<br>Beswick, Andrew; University of Bristol, School of Clinical Sciences |
| <b>Primary Subject Heading</b>: | Rehabilitation medicine                                                                                                                                                                                                                                                                        |
| Secondary Subject Heading:      | Surgery, Health services research                                                                                                                                                                                                                                                              |
| Keywords:                       | Total knee replacement, Chronic post-surgical pain, Prevention, Systematic review                                                                                                                                                                                                              |
|                                 |                                                                                                                                                                                                                                                                                                |

SCHOLARONE™  
Manuscripts

1  
2  
3 **The effectiveness of post-discharge intervention for reducing the severity of chronic**  
4 **pain after total knee replacement: Systematic review of randomised controlled trials**  
5  
6  
7

8  
9 Wylde V<sup>1,2</sup>, Dennis J<sup>1</sup>, Gooberman-Hill R<sup>1,2</sup>, Beswick AD<sup>1</sup>  
10

11  
12 <sup>1</sup>Musculoskeletal Research Unit, Translational Health Sciences, Bristol Medical School,  
13  
14 University of Bristol, UK  
15

16  
17 <sup>2</sup>National Institute for Health Research Bristol Biomedical Research Centre, University of  
18  
19 Bristol, UK  
20

21 **E-mail addresses**  
22

23  
24 Vikki Wylde: [v.wylde@bristol.ac.uk](mailto:v.wylde@bristol.ac.uk)  
25

26  
27 Jane Dennis: [jane.dennis@bristol.ac.uk](mailto:jane.dennis@bristol.ac.uk)  
28

29  
30 Rachael Gooberman-Hill: [r.goberman-hill@bristol.ac.uk](mailto:r.goberman-hill@bristol.ac.uk)  
31

32  
33 Andrew Beswick: [andy.beswick@bristol.ac.uk](mailto:andy.beswick@bristol.ac.uk)  
34  
35

36  
37 **Corresponding author**  
38

39 Dr Vikki Wylde, Musculoskeletal Research Unit, Translational Health Sciences, Bristol  
40  
41 Medical School, Learning and Research Building, Southmead Hospital, Bristol, BS10 5NB,  
42  
43 UK  
44

45 E-mail: [V.Wylde@bristol.ac.uk](mailto:V.Wylde@bristol.ac.uk), Telephone: +44 (0)117 414 7878  
46  
47  
48  
49  
50

51  
52 **Word count: 2744**  
53

54 Running title: Post-discharge interventions and chronic pain after TKR  
55  
56  
57

## ABSTRACT

### Objective

Approximately 20% of patients experience chronic pain after total knee replacement (TKR). The aim of this systematic review was to evaluate the effectiveness of post-discharge interventions commenced in the first three months after surgery in reducing the severity of chronic pain after TKR.

### Design

The protocol for this systematic review was registered on PROSPERO (CRD42017041382). MEDLINE, Embase, CINAHL, PsycINFO and *The Cochrane Library* were searched from inception to November 2016. Randomised controlled trials of post-discharge intervention which commenced in the first three months after TKR surgery were included. The primary outcome of the review was self-report pain severity at 12 months or longer after TKR. Risk of bias was assessed using the Cochrane risk-of-bias tool.

### Results

Seventeen trials with data from 2,485 randomised participants were included. The majority of trials evaluated physiotherapy interventions (n=13); other interventions included nurse-led interventions (n=2), neuromuscular electrical stimulation (n=1) and a multidisciplinary intervention (n=1). Opportunities for meta-analysis were limited by heterogeneity. No study found a difference in long-term pain severity between trial arms, with the exception of one trial which found home-based functional exercises aimed at managing kinesiophobia resulted in lower pain severity scores at 12 months post-operative compared to advice to stay active.

### Conclusion

1  
2  
3 This systematic review and narrative synthesis found no evidence that one type of  
4  
5 physiotherapy intervention is more effective than another at reducing the severity of chronic  
6  
7 pain after TKR. Further research is needed to evaluate non-physiotherapy interventions,  
8  
9 including the provision of care as part of a stratified and multidisciplinary care package.  
10  
11  
12  
13  
14

15 **Key words:** Total knee replacement, chronic post-surgical pain, prevention, systematic  
16  
17 review  
18  
19

### 20 **Strengths and limitations of this study**

21  
22

- 23 • This is the first systematic review to evaluate the effectiveness of post-discharge  
24 interventions delivered in the first three months after surgery in reducing the severity  
25 of chronic pain after total knee replacement.  
26  
27
- 28 • Synthesis of adverse events data was not possible because assessment and reporting  
29 was variable and often poor.  
30  
31
- 32 • We did not include studies that used a composite pain and function measure to assess  
33 pain outcome.  
34  
35  
36  
37  
38  
39  
40  
41  
42  
43  
44  
45  
46  
47  
48  
49  
50  
51  
52  
53  
54  
55  
56  
57  
58  
59  
60

## INTRODUCTION

Total knee replacement (TKR) is a common operation to provide pain relief, predominately due to osteoarthritis. Despite good outcomes for many, some patients report chronic pain in the months and years after TKR. Chronic post-surgical pain is defined as pain that is present or increases in intensity at  $\geq 3$  months after surgery [1]. In representative populations, unfavourable long-term pain outcomes have been reported by 10-34% of patients with TKR [2]. Patients with bothersome pain at  $\geq 3$  months after surgery are disappointed with their outcome [3 4]. Given the prevalence and impact of chronic pain, it is important to evaluate interventions that may optimise patients' outcomes after TKR.

During the hospital stay after TKR, rehabilitation focuses on regaining range of motion and improving mobility. After discharge, rehabilitation aims to enhance recovery, through supporting a person to regain function and quality of life, optimising pain relief and re-integration into social and personal environments [5]. While physiotherapy often focusses on functional health, another key outcome is the prevention of long-term pain [6]. Post-operative physiotherapy may be combined with other interventions to provide comprehensive, multidisciplinary and holistic rehabilitation [7]. A key step to improving patients' outcomes after TKR is to evaluate if early post-operative rehabilitation interventions can reduce the severity of chronic pain after TKR. Chronic pain is difficult to treat once established [8], and therefore it is important to evaluate the effectiveness of early post-operative interventions in reducing the severity of chronic pain.

The aim of this systematic review was to evaluate the effectiveness of post-discharge interventions delivered in the first three months after surgery for reducing the severity of chronic pain after TKR.

## METHODS

The review was registered on the international prospective register of systematic reviews (PROSPERO) on 17<sup>th</sup> January 2017 (registration number CRD42017041382). The review was conducted following guidance from the Cochrane Handbook [9] and reported in accordance with PRISMA guidelines [10] (Appendix 1).

### Eligibility criteria

Studies were eligible for inclusion in the review if they met the following criteria:

**Population:** Adults discharged from hospital after primary TKR predominantly for osteoarthritis.

**Intervention:** Any post-discharge intervention which commenced in the first three months after TKR surgery.

**Control:** Any, including no intervention, usual care, placebo or an alternative intervention.

**Outcomes:** The primary outcome was pain severity at 12 months or longer after TKR, as patient-reported levels of pain plateau by this time point [11 12]. Pain severity could be assessed using a patient-reported joint-specific pain measure (e.g. WOMAC or KOOS pain domains), a quality of life measure (e.g. SF-36 or SF-12) or a Visual Analogue Scale (VAS).

The secondary outcome was adverse events.

**Study type:** Randomised controlled trials (RCTs).

### Information sources and searches

MEDLINE, Embase, CINAHL, PsycINFO and *The Cochrane Library* were searched from inception to 15th November 2016 (Appendix 2). No language restrictions were applied and relevant non-English articles were translated and included if appropriate. Studies reported

1  
2  
3 only as abstracts or that were unobtainable as full text copies using inter-library loans or  
4 email contact with authors were excluded. Citations of key reviews and studies were checked  
5 in ISI Web of Science.  
6  
7  
8  
9

## 10 **Screening**

11  
12 Records identified by searches were imported into Endnote X7 (Thomson Reuters) and  
13 duplicates removed. From the searches, an Endnote database of all RCTs and systematic  
14 reviews in TKR was established. Within this database, interventions conducted during the  
15 post-operative period were identified. An initial screen for potential eligibility was  
16 undertaken by one reviewer (ADB) to exclude articles that were clearly not relevant.  
17  
18 Subsequently, abstracts and full-text articles were screened independently by two reviewers  
19 (VW and ADB or JD). Results of screening were compared, and any discrepancies were  
20 resolved through further review of the full text articles and discussion between reviewers.  
21  
22 Reasons for exclusion were recorded.  
23  
24  
25  
26  
27  
28  
29  
30  
31  
32

## 33 **Data extraction**

34  
35 Data from studies that met the eligibility criteria were extracted onto a standardised proforma  
36 by one reviewer (VW). Data extraction was checked against source articles by a second  
37 reviewer (JD). Extracted data comprised: country, date, participant characteristics, selection  
38 criteria; intervention and control treatment; follow up intervals; losses to follow-up; primary  
39 outcome; outcome data for pain; adverse events (any untoward medical occurrence in a  
40 clinical study participant regardless of the causal relationship with the study treatment) and  
41 information for risk of bias assessment. Any disagreements between reviewers were  
42 discussed with a third reviewer (ADB) and consensus reached.  
43  
44  
45  
46  
47  
48  
49  
50  
51  
52

53 A single e-mail was sent to authors of studies with an appropriate follow-up period but no  
54 pain outcome to enquire if an appropriate outcome was available. If a combined pain and  
55  
56  
57

1  
2  
3 function outcome was reported, such as the OKS or the total WOMAC score, separate pain  
4 subscale data were requested. Authors were contacted when necessary for clarification  
5 purposes or to request unpublished relevant data. If a study reported data that were combined  
6 for knee and hip replacement patients, then disaggregated data for patients with TKR were  
7 requested. If this was not available, then the study was excluded.  
8  
9  
10  
11  
12

### 13 14 **Risk of bias assessment**

15  
16  
17 Potential sources of bias were assessed using the Cochrane risk of bias tool [9]. At the  
18 protocol stage, analysis was planned which included all studies, with sensitivity analyses  
19 conducted to exclude studies judged to be at high risk of bias.  
20  
21  
22

### 23 24 **Strategy for data synthesis**

25  
26  
27 At the protocol stage, meta-analysis using RevMan 5 [13] was planned if two or more studies  
28 were identified with similar interventions and comparator groups and appropriate outcome  
29 data. If continuous pain outcomes were measured differently across studies, overall  
30 standardised mean differences and 95% confidence intervals would be calculated and  
31 presented alongside measures of heterogeneity ( $I^2$ ). Where possible, subgroup analyses were  
32 planned to explore the effectiveness of different intervention content and intensity, and  
33 different comparator interventions.  
34  
35  
36  
37  
38  
39  
40  
41  
42

43 Opportunities for pooling outcome data in meta-analysis were limited by heterogeneity. This  
44 included the content, duration and intensity of both the treatments in both the intervention  
45 and comparison group. For example, a number of the trials were pragmatic with the control  
46 group receiving 'usual care', which varied considerably between studies. Therefore, a  
47 narrative synthesis was performed.  
48  
49  
50  
51  
52  
53  
54  
55  
56  
57  
58  
59  
60



## RESULTS

Searches identified 7,954 articles. After detailed evaluation of full-text articles, 17 studies with 2,485 randomised participants were included [14-30] (Figure 1). Two included studies were published after the search dates, but were identified from protocols published within the search dates [15 17].

### Study characteristics

Table 1 provides an overview of study characteristics. Included studies were from Australia (n=3), Canada (n=2), Finland (n=2), Germany (n=2), United Kingdom (n=2), China (n=1), Denmark (n=1), Italy (n=1), Norway (n=1), Turkey (n=1) and United States of America (n=1). The number of centres was reported for 15 studies: eight studies were conducted in a single centre, three studies were conducted in two centres, and four studies were conducted in  $\geq 4$  centres. Sample sizes ranged from 34 to 422 participants, with a median of 117. All studies had two arms, with the exception of one three-arm trial [20]. Three studies were described as pilot or feasibility studies [16 18 24].

### Study quality

Risk of bias assessments for individual studies are displayed in Figure 2. All studies were at high risk of bias for blinding of participants and pain outcome assessment due to the nature of the intervention and the self-reporting of pain. Five studies were at high risk of bias due to incomplete outcome data and one due to selective outcome reporting.

### Outcomes assessment

The primary outcome was specified for 13 trials; this was function in eight trials; a composite of pain and function in four trials, and pain in one trial (Appendix 3). Pain severity was most commonly assessed using the WOMAC pain scale (n=9); other tools included the KOOS pain

1  
2  
3 scale (n=4), VAS (n=2), and single items from the OKS (n=1) and KOS ADL (n=1). Adverse  
4  
5 events were poorly described and reported in the majority of studies and therefore pooling of  
6  
7 harms data was not possible. A summary of adverse events findings is presented in Appendix  
8  
9 4. Pain was assessed at 12 months after TKR in 16 studies and at 14 months in one study. A  
10  
11 summary of results from the individual studies is provided in Appendix 3.  
12  
13

## 14 **Interventions**

15  
16  
17 The majority of studies evaluated physiotherapy interventions (n=13); other interventions  
18  
19 evaluated included nurse-led interventions (n=2), neuromuscular electrical stimulation  
20  
21 (NMES) (n=1) and a multidisciplinary intervention (n=1).  
22  
23

## 24 **Physiotherapy interventions**

25  
26  
27 Thirteen studies with 1,880 randomised patients evaluated the effectiveness of post-discharge  
28  
29 physiotherapy interventions. All interventions started within two months of surgery, with the  
30  
31 majority commencing within two weeks of surgery. In addition to all studies being at risk of  
32  
33 bias due to issues with blinding, risk of bias due to incomplete outcome data was evident for  
34  
35 four studies [18 22 23 25]. Seven studies compared physiotherapy interventions with usual  
36  
37 care or minimal care; interventions included a walking skills programme [14], group-based  
38  
39 circuit exercise classes [17], ergometer cycling [22], home-based functional rehabilitation  
40  
41 [24], clinic-based functional rehabilitation [25], home-based functional exercises aimed at  
42  
43 managing kinesiophobia [26], and delayed monitored home exercises [29]. Five studies  
44  
45 compare two forms of treatment including inpatient rehabilitation compared with home  
46  
47 exercise [15], home-based functional exercise and home-based traditional exercise [18], 1:1  
48  
49 physiotherapy and home-based rehabilitation [21], supervised and home-based physiotherapy  
50  
51 [30], early aquatic therapy and late aquatic therapy [23], and a three-arm trial comparing 1:1  
52  
53 physiotherapy, group-based circuit classes and a monitored home exercise programme [20].  
54  
55  
56  
57

1  
2  
3 Of the 13 studies, only one trial reported a difference in pain severity between groups;  
4 patients randomised to 6 months of home-based exercises aimed at managing kinesiophobia  
5 had lower pain severity scores at 12 months post-operative compared with patients who  
6 received general advice to stay active [26].  
7  
8  
9  
10

### 11 **Nurse-led interventions**

12  
13  
14  
15 Two studies with 319 randomised patients reported evaluation of a nurse-led intervention  
16 compared with no care or usual care. Except for issues relating to blinding, both studies were  
17 at low risk of bias. Both studies evaluated nurse-led structured telephone follow-up; one  
18 aimed to improve adherence to home exercise [16] and the other to provide information  
19 regarding well-being, integrity, prophylaxis, safety and other issues relevant to patients after  
20 TKR [28]. Pain outcome data (mean and standard deviations) were not available for latter  
21 study and therefore meta-analysis was not possible. Neither study found a difference in pain  
22 severity scores at 12 months post-operative between the intervention and control group.  
23  
24  
25  
26  
27  
28  
29  
30  
31  
32

### 33 **Other interventions**

34  
35  
36 Two studies reported evaluations of other interventions. Except for issues relating to blinding,  
37 both studies were at low risk of bias. One trial involving 86 patients compared a group-based  
38 multidisciplinary programme with usual care [19]. This 10-day programme involved  
39 physiotherapy, Nordic walking, relaxation strategies, and sessions with a psychologist, social  
40 worker, nutritionist and orthopaedic surgeon. Another trial with 200 patients, at high risk of  
41 bias due to incomplete outcome data and selective outcome reporting, evaluated a combined  
42 NMES and volitional strength training programme compared with volitional strength training  
43 program without NMES [27]. Both studies found no difference in pain severity scores at 12  
44 months post-operative between the intervention and control group.  
45  
46  
47  
48  
49  
50  
51  
52  
53  
54  
55  
56  
57  
58  
59  
60

### Ongoing research

In searches of databases and citation searches on ISI Web of Science we identified a number of published RCT protocols that are evaluating post-discharge interventions with a pain severity outcome at  $\geq 12$  months after TKR. Interventions being evaluated include a digital activity coaching system for home exercise [31], Wii-enhanced rehabilitation [32], group-based outpatient physiotherapy with an individualised element [33], multicomponent rehabilitation for patients at risk of a poor outcome [34] and physiotherapy for patients performing poorly at six weeks after TKR [35]. Some of these studies are now finished and findings are likely to be reported imminently.

### DISCUSSION

This systematic review aimed to evaluate the effectiveness of post-discharge interventions delivered in the first three months after surgery for reducing the severity of chronic pain after TKR. Interventions that predominately comprise physiotherapy have been evaluated in RCTs. In most studies, the control group received some form of physiotherapy care and therefore the aim of the trials was to compare the effectiveness of different types of physiotherapy, rather than comparing the effectiveness of physiotherapy to no care. A narrative synthesis of the evidence suggests that no physiotherapy intervention appears to be more effective than another at reducing the severity of chronic pain after TKR. However, findings from the trial of a 6 month home-based functional exercise programme aimed at managing kinesiophobia [26] compared to advice to stay active were encouraging and warrant further evaluation. Few studies have been conducted to evaluate the effectiveness of non-physiotherapy interventions at reducing chronic pain after TKR, and further research is needed.

1  
2  
3 There are a number of strengths and limitations to this systematic review. The main outcome  
4 of interest in this review was pain severity at  $\geq 12$  months after TKR. Although the primary  
5 outcome of many of the included studies was function, pain severity was an important  
6 secondary outcome in these studies. Studies that used a composite pain and function measure  
7 to assess outcome, for example the OKS or WOMAC, were excluded if authors were unable  
8 to provide pain subscales scores. Although this reduced the number of studies eligible for  
9 inclusion, this approach was taken because pain and function are distinct outcome domains,  
10 with different predictors and recovery trajectories [36 37]. The secondary outcome of this  
11 review was adverse events, to allow the synthesis of harms data. However, synthesis was not  
12 possible because assessment and reporting of adverse events was variable and often poor. The  
13 quality of adverse events reporting is a common issue in surgical trials [38], and evidence-  
14 based recommendations are needed to promote standardisation, improve quality and reduce  
15 heterogeneity of adverse events reporting in orthopaedic studies. A potential limitation of the  
16 included studies was that they were all at high risk of bias due to the lack of participant  
17 blinding for self-report pain. However, blinding of participants is rarely possible in RCTs of  
18 this nature. Also, it would be expected that the risk would arise from participants in the  
19 intervention group reporting less pain, which may potentially be an issue with shorter-term  
20 outcomes, but this was not evident from the longer-term follow-up of the studies included in  
21 this review.  
22  
23  
24  
25  
26  
27  
28  
29  
30  
31  
32  
33  
34  
35  
36  
37  
38  
39  
40  
41  
42  
43

44 This systematic review took a broad approach by evaluating the effectiveness of any type of  
45 post-discharge intervention that aimed to reduce the severity of chronic pain after TKR.  
46 Interventions that span the post-operative period may be delivered as part of a comprehensive  
47 peri-operative package of care, and these would not have been identified in this review;  
48 however, evaluations of the effectiveness of pre-operative and peri-operative interventions  
49 for reducing chronic pain severity are being conducted separately (CRD42017041382).  
50  
51  
52  
53  
54  
55  
56  
57

1  
2  
3 Previous systematic reviews of interventions to improve long-term outcomes after TKR have  
4 been conducted, but these have evaluated pre-operative interventions or have been narrower  
5 in focus. Systematic reviews of pre-operative interventions have found that exercise and  
6 education have a limited effect on improving long-term pain and function after TKR [39-43].  
7  
8 Previous systematic reviews of post-discharge interventions have focussed on physiotherapy,  
9 finding some evidence of short-term benefit but a lack of evidence to draw conclusions about  
10 long-term benefit [6 44 45]. One systematic review has evaluated interventions for the  
11 management of chronic pain after TKR, identifying only a single RCT of botulinum toxin A  
12 injections [46]. Our systematic review adds to this literature by providing evidence that no  
13 specific type of post-discharge physiotherapy intervention appears to be more effective than  
14 another at reducing the severity of chronic pain after TKR, although the positive impact of a  
15 home-based programme aimed at managing kinesiophobia compared with advice to stay  
16 active warrants further investigation.  
17  
18  
19  
20  
21  
22  
23  
24  
25  
26  
27  
28  
29  
30

31 The aim of this review was to evaluate the effectiveness of post-discharge interventions at  
32 reducing chronic pain severity after TKR. However, the primary aim of most trials included  
33 in the review was to improve functional ability after TKR. Only one trial had a primary  
34 outcome of pain severity [29], although a number of other trials assessed their primary  
35 outcome with a composite measure of pain and function [17 20 24 26]. However, pain  
36 severity was assessed as a secondary outcome in these trials and therefore it was expected  
37 that the intervention may reduce long-term pain. All but one study found that the intervention  
38 did not provide any benefit on long-term pain severity compared to the control group.  
39  
40 However, the treatment received in the control group, particularly in the physiotherapy trials,  
41 varied considerably between studies, including a different form or intensity of physiotherapy,  
42 provision of physiotherapy based on a needs assessment, delayed treatment or no treatment.  
43  
44 Therefore, it is not appropriate to draw conclusions on the effectiveness of any particular type  
45  
46  
47  
48  
49  
50  
51  
52  
53  
54  
55  
56  
57  
58  
59  
60

1  
2  
3 of physiotherapy intervention based on the findings of this review. However, the evidence  
4 does suggest that no type of physiotherapy intervention is more effective than another at  
5 reducing the severity of chronic pain after TKR. An important finding of this review is that  
6 only four trials have been conducted which have evaluated non-physiotherapy interventions,  
7 highlighting the need for more research in this field. In particular, further research with pain  
8 severity as the pain outcome is needed to ensure that RCTs are adequately powered to  
9 evaluate the effectiveness of post-discharge interventions on reducing chronic pain severity.  
10  
11

12  
13  
14  
15  
16  
17  
18 There are important considerations in the design and delivery of future post-discharge  
19 interventions that warrant further discussion. All the interventions included in this review  
20 were uniformly delivered to all patients, rather than just those patients who may be at most  
21 risk of poor outcome. Only 20% of patients will develop chronic pain after TKR [2] and  
22 delivering physiotherapy to all patients may reduce the ability to detect clinical benefit in  
23 terms of pain severity. In the future, interventions might be more effective if they include  
24 processes to identify patients at high risk of chronic pain and provide these patients with  
25 intensive and comprehensive interventions that have been specifically designed to reduce  
26 their risk of developing chronic pain. However, identifying high risk patients is challenging;  
27 pre-operative models to identify patients at risk of a poor outcome have low predictive power  
28 [36 37], and the evidence for post-operative risk factors is limited [47]. However, research is  
29 currently ongoing to evaluate whether providing a rehabilitation programme for patients at  
30 risk of a poor outcome [48] or are 'functioning poorly' at six weeks after TKR [35] can  
31 improve longer-term outcomes.  
32  
33  
34  
35  
36  
37  
38  
39  
40  
41  
42  
43  
44  
45  
46  
47  
48

49 Preventing chronic pain after TKR is challenging because of the complexity of this pain  
50 condition. Although chronic pain after TKR is not yet fully understood, the aetiology of this  
51 pain is multifactorial, including surgical factors, complex regional pain syndrome, pain  
52 sensitisation, neuropathic pain and psychosocial factors [49-54]. Therefore, an intervention  
53  
54  
55  
56  
57  
58  
59  
60

1  
2  
3 comprising a single treatment modality may be insufficient to address and reduce the causes  
4 of pain for all patients. As with the treatment of other chronic pain conditions, this highlights  
5 the importance of focused, individualised and multidisciplinary treatment [8 55]. Such an  
6 approach is being evaluated in an ongoing RCT of a care pathway for patients with chronic  
7 pain after TKR (ISRCTN92545361). Therefore, further research is needed to evaluate the  
8 effectiveness of providing stratified and multidisciplinary care packages for preventing  
9 chronic pain after TKR.  
10  
11  
12  
13  
14  
15  
16  
17

18 In conclusion, findings from this systematic review and narrative synthesis are that there is no  
19 evidence that one type of physiotherapy intervention is more effective than another at  
20 reducing the severity of chronic pain after TKR. Further research is needed to evaluate non-  
21 physiotherapy interventions, including the provision of care as part of stratified and  
22 multidisciplinary care package.  
23  
24  
25  
26  
27  
28  
29  
30  
31  
32  
33  
34  
35  
36  
37  
38  
39  
40  
41  
42  
43  
44  
45  
46  
47  
48  
49  
50  
51  
52  
53  
54  
55  
56  
57  
58  
59  
60



1  
2  
3 **FIGURE LEGENDS**  
4

5  
6 **Figure 1: Systematic review flow diagram**  
7

8 **Figure 2: Risk of bias assessment for individual studies**  
9  
10  
11  
12  
13  
14  
15  
16  
17  
18  
19  
20  
21  
22  
23  
24  
25  
26  
27  
28  
29  
30  
31  
32  
33  
34  
35  
36  
37  
38  
39  
40  
41  
42  
43  
44  
45  
46  
47  
48  
49  
50  
51  
52  
53  
54  
55  
56  
57  
58  
59  
60

For peer review only

## ACKNOWLEDGEMENTS

We would like to thank all the study authors who took the time to reply to our requests for further clarification or additional data.

## AUTHOR CONTRIBUTIONS

All authors contributed to the concept and design of the study. ADB, JD and VW contributed to the acquisition and analysis of data. VW drafted the article and ADB, JD and RGH revised it critically for important intellectual content. VW and ADB take responsibility for the integrity of the work as a whole, from inception to finished article.

## FUNDING

This article presents independent research funded by the National Institute for Health Research (NIHR) under its Programme Grants for Applied Research programme (RP-PG-0613-20001). The views expressed are those of the authors and not necessarily those of the NHS, the NIHR or the Department of Health. The funder had no involvement in the study design, data collection, data analysis, interpretation of data or writing of the manuscript.

This study was supported by the NIHR Biomedical Research Centre at the University Hospitals Bristol NHS Foundation Trust and the University of Bristol. The views expressed in this publication are those of the author(s) and not necessarily those of the NHS, the National Institute for Health Research or the Department of Health.

## COMPETING INTERESTS

The authors have no conflicts of interest to declare.

## DATA SHARING STATEMENT

No additional data are available.

**Table 1: Overview of study characteristics**

| Publication<br>Location<br>Date of study<br>Number of centres | Randomised<br>Mean age<br>% female      | Intervention treatment                                                                                                                                                                                                                           | Control treatment                                                                                                                                                        | Pain assessment<br>Adherence to treatment<br>Losses to follow-up                                                   |
|---------------------------------------------------------------|-----------------------------------------|--------------------------------------------------------------------------------------------------------------------------------------------------------------------------------------------------------------------------------------------------|--------------------------------------------------------------------------------------------------------------------------------------------------------------------------|--------------------------------------------------------------------------------------------------------------------|
| Bruun-Olsen et al, 2013<br>Norway<br>2008-2010<br>2 centres   | N=57(29:28)<br>68:69 years<br>62:50%    | Group-based physiotherapist-led walking skills programme (2-6 patients per group). Commenced 6 weeks after surgery. 12 sessions over 6-8 weeks.                                                                                                  | 1:1 usual physiotherapy care consisting of 12 individual physiotherapy sessions. Commenced 6 weeks after surgery. Twice weekly sessions until 12-14 weeks after surgery. | KOOS pain scale<br>28/29 completed intervention<br>28/28 received control treatment<br>6 (2:4) lost to follow-up   |
| Buhagiar et al, 2017<br>Australia<br>2012-2015<br>2 centres   | N=165(81:84)<br>67:67 years<br>69:68%   | Inpatient rehabilitation at rehabilitation facility with twice daily supervised sessions of 1:1 and group-based exercises. Commenced after hospital discharge for 10 days. Home exercise programme after discharge from rehabilitation facility. | Home exercise programme comprising of 2-3 group-based outpatient session to practice and progress exercises. Commenced 2 weeks after surgery.                            | KOOS pain scale<br>72/81 adhered to intervention<br>74/84 adhered to control treatment<br>6(2:4) lost to follow-up |
| Buker et al, 2014*<br>Turkey<br>2009-2011<br>1 centre         | N=34 (18:16)<br>64:68 years<br>89:94%   | 20 sessions of supervised physiotherapy and rehabilitation including range of motion and strengthening exercises, application of heat and TENS application. Five days a week for four weeks.                                                     | Home exercises including range of motion and strengthening exercise for one hour per day. Five days a week for four weeks.                                               | Pain VAS<br>Adherence not reported<br>Losses to follow-up not reported                                             |
| Chen et al, 2016<br>China<br>2013-2014<br>1 centre            | N=202(101:101)<br>66:67 years<br>63:67% | Structured telephone follow-up by nurse at 1, 3 and 6 weeks after hospital discharge to improve adherence to home exercise routine.                                                                                                              | No telephone follow-up                                                                                                                                                   | Pain VAS<br>Adherence not reported<br>15(7:8) lost to follow-up                                                    |
| Fransen et al, 2017<br>Australia<br>2009-2012                 | N=422(212:210)<br>64:65 years<br>54:52% | Group-based circuit exercise classes supervised by physiotherapist. Up to 6 patients per class. Commenced 6 weeks after surgery. Twice                                                                                                           | Usual physiotherapy care. 22% of participants reported 6 or more occasions of physiotherapy                                                                              | WOMAC pain scale<br>140/212 participants attended $\geq 12$ classes                                                |

|                                                                       |                                                    |                                                                                                                                                |                                                                                                                                                                                                                                                                                                                                                                                   |                                                                                                                                                                                                           |
|-----------------------------------------------------------------------|----------------------------------------------------|------------------------------------------------------------------------------------------------------------------------------------------------|-----------------------------------------------------------------------------------------------------------------------------------------------------------------------------------------------------------------------------------------------------------------------------------------------------------------------------------------------------------------------------------|-----------------------------------------------------------------------------------------------------------------------------------------------------------------------------------------------------------|
| 12 centres                                                            |                                                    | weekly sessions for at least 8 weeks.                                                                                                          | during the 6–12-week period after TKR                                                                                                                                                                                                                                                                                                                                             | 210/210 received control treatment<br>74(43:31) lost to follow-up                                                                                                                                         |
| Frost et al, 2002<br>UK<br>1995-1996<br>Not reported                  | N=47(23:24)<br>72:71 years<br>48:50%               | Home-based functional exercise. Commenced following discharge from hospital. Duration not reported.                                            | Home-based traditional exercise.                                                                                                                                                                                                                                                                                                                                                  | OKS item (pain on walking)<br>Adherence not reported<br>20 (7:13) lost to follow-up                                                                                                                       |
| Kauppila et al, 2010 <sup>s</sup><br>Finland<br>2002-2005<br>1 centre | N=86(44:42)<br>71:71 years<br>76:79%               | Group-based multidisciplinary rehabilitation programme. Up to 8 patients per group. Commenced 2-4 months after surgery for 10 days.            | Usual physiotherapy care. Supervised exercise programme at 2 month outpatient visit, with provision of further rehabilitation based on needs assessment.                                                                                                                                                                                                                          | WOMAC pain scale<br>44/44 attended intervention<br>42:42 received control treatment<br>11 (8:3) lost to follow-up                                                                                         |
| Ko et al, 2013<br>Australia<br>2008-2010<br>3 arm trial<br>4 centres  | N=<br>249(85:84:80)<br>67:68:67 years<br>68:60:61% | 1:1 physiotherapy with home-based sessions. Commenced 2 weeks after surgery. Twice weekly 1:1 and home-based sessions over 6 weeks.            | 1.) Group-based circuit classes supervised by physiotherapist with home-based sessions. Up to 8 patients per class. Commenced 2 weeks after surgery. Twice weekly group and home-based sessions over 6 weeks.<br><br>2.) Monitored home programme, 2 1:1 physiotherapy sessions and 1 telephone follow-up call. Commenced 2 weeks after surgery. 4 sessions per week for 6 weeks. | WOMAC pain scale<br>80% participants attended 9 or more 1:1 sessions, 77% attended 9 or more group sessions, 83% attended both sessions in monitored home programme group.<br>16(7:3:6) lost to follow-up |
| Kramer et al, 2003<br>Canada<br>Not reported<br>Not reported          | N=160(80:80)<br>68:69 years<br>59:55%              | 1:1 clinic-based rehabilitation programme with home exercise programme. Commenced 2 weeks after surgery. Up to 2 sessions a week for 10 weeks. | Home-based rehabilitation, monitored by telephone calls from physiotherapist. Commenced 2 weeks after surgery. At least 1 telephone call in weeks 2-6 and 1 call in                                                                                                                                                                                                               | WOMAC pain scale<br>76/80 received intervention<br>78/80 received control treatment<br>26 (15:22) lost to follow-up                                                                                       |

|                                                                |                                         |                                                                                                                                                                                           |                                                                                                                                                      |                                                                                                                                                  |
|----------------------------------------------------------------|-----------------------------------------|-------------------------------------------------------------------------------------------------------------------------------------------------------------------------------------------|------------------------------------------------------------------------------------------------------------------------------------------------------|--------------------------------------------------------------------------------------------------------------------------------------------------|
|                                                                |                                         |                                                                                                                                                                                           | weeks 7-12.                                                                                                                                          |                                                                                                                                                  |
| Liebs et al, 2010*<br>Germany<br>2005-2006<br>5 centres        | N=159(85:74)<br>70:70 years<br>73:70%   | Ergometer cycling supervised by physiotherapist. Commenced 2 weeks after surgery. 3 sessions a week for at least 3 weeks.                                                                 | No ergometer cycling.                                                                                                                                | WOMAC pain scale<br>Adherence not reported<br>33(15:18) lost to follow-up                                                                        |
| Liebs et al, 2012*<br>Germany<br>2003-2004<br>2 centres        | N=185(87:98)<br>69:71 years<br>70:73%   | Early aquatic therapy. Commenced 6 days after surgery. 3 times a week up to 5 <sup>th</sup> week post-operative.                                                                          | Late aquatic therapy. Commenced 14 days after surgery. 3 times a week up to 5 <sup>th</sup> week post-operative.                                     | WOMAC pain scale<br>Adherence not reported<br>41(18:23) lost to follow-up                                                                        |
| Minns Lowe et al, 2012<br>UK<br>2006-2008<br>1 centre          | N=107 (56:51)<br>68:71 years<br>57:59%  | Home-based functional rehabilitation with 2 visits from physiotherapist at 2 weeks and 6-8 weeks after hospital discharge. Twice daily exercises for at least 3 months.                   | Usual physiotherapy care involving provision of an exercise booklet, with outpatient physiotherapy on a needs only basis. No additional home visits. | KOOS pain scale<br>46/56 patients received 2 visits<br>47/51 received control treatment<br>9 (7:2) lost to follow-up                             |
| Moffet et al, 2004<br>[25]<br>Canada<br>1997-1999<br>5 centres | N=77(38:39)<br>67:69 years<br>63:56%    | Functional rehabilitation programme with individualised home exercises. Commenced at 2 months after surgery. 12 supervised sessions over 6-8 weeks.                                       | Usual physiotherapy care, which included supervised home rehabilitation visits for 26% of patients.                                                  | WOMAC pain scale<br>38/38 participated in 12 sessions<br>39/39 received control treatment<br>8(0:8) lost to follow-up                            |
| Monticone et al, 2010-2013<br>Italy<br>1 centre                | N=110(55:55)<br>67:68 years<br>65:62%   | Home-based functional exercises aimed at managing kinesiophobia, with monthly phone calls to encourage adherence. Commenced after hospital discharge. Twice weekly sessions for 6 months. | No physiotherapy, advice to stay active.                                                                                                             | KOOS pain scale<br>Adherence not reported<br>0 lost to follow-up                                                                                 |
| Petterson et al, 2009<br>USA<br>200-2005<br>1 centre           | N=200(100:100)<br>65:65 years<br>47:45% | Combined neuromuscular electric stimulation (NMES) and volitional strength training programme. Commenced 3-4 weeks after surgery. 2 or 3 sessions a week for 6 weeks.                     | Volitional strength training program without NMES.                                                                                                   | KOS ADL item (effect of pain on function)<br>84/100 completed intervention<br>97/100 completed control treatment<br>51 (32:19) lost to follow-up |
| Szots et al, 2016<br>Denmark                                   | N=117(59:58)<br>67:68 years             | Two nurse-led structured telephone follow-up calls. Telephone calls at 4 days and 14 days                                                                                                 | No telephone follow-up.                                                                                                                              | WOMAC pain scale<br>54/59 patients had both telephone                                                                                            |

1  
2  
3  
4  
5  
6  
7  
8  
9  
10  
11  
12  
13  
14  
15  
16  
17  
18  
19  
20  
21  
22  
23  
24  
25  
26  
27  
28  
29  
30  
31  
32  
33  
34  
35  
36  
37  
38  
39  
40  
41  
42  
43  
44  
45  
46  
47

|                                                                 |                                       |                                                                                                                                                              |                                                                                 |                                                                                                                                                                                   |
|-----------------------------------------------------------------|---------------------------------------|--------------------------------------------------------------------------------------------------------------------------------------------------------------|---------------------------------------------------------------------------------|-----------------------------------------------------------------------------------------------------------------------------------------------------------------------------------|
| 2013<br>1 centre                                                | 61:67%                                | after hospital discharge.                                                                                                                                    |                                                                                 | follow-up calls<br>54/58 received control treatment<br>9(5:4) lost to follow-up                                                                                                   |
| Vuorenmaa et al,<br>2014 **<br>Finland<br>2008-2010<br>1 centre | N=108(53:55)<br>69:69 years<br>57:65% | Delayed monitored home exercises, with guidance from physiotherapist at 2, 3 and 6 months post-operative. Commenced at 2 months after surgery for 12 months. | Usual care, which involved no additional guidance from 2 months post-operative. | WOMAC pain scale<br>72% of patients performed the training sessions at least twice per week in the first 6 months<br>53/53 received control treatment<br>4(2:2) lost to follow-up |

\* 24 month follow-up also conducted but data from 12 month follow-up included in table to be consistent with follow-up period of other studies

\*\* Follow-up at 14 months post-operative

\$ Pain-specific outcome data was provided by the authors for a previous review [56] and was used again in this review

**REFERENCES**

1. Werner MU, Kongsgaard UE. I. Defining persistent post-surgical pain: is an update required? *Br J Anaesth* 2014;**113**(1):1-4.
2. Beswick AD, Wylde V, Gooberman-Hill R, et al. What proportion of patients report long-term pain after total hip or knee replacement for osteoarthritis? A systematic review of prospective studies in unselected patients. *BMJ Open* 2012;**2**(1):e000435.
3. Scott CE, Howie CR, MacDonald D, et al. Predicting dissatisfaction following total knee replacement: a prospective study of 1217 patients. *J Bone Joint Surg Br* 2010;**92**(9):1253-8.
4. Jeffery AE, Wylde V, Blom AW, et al. "It's there and I'm stuck with it": patients' experiences of chronic pain following total knee replacement surgery. *Arthritis Care Res (Hoboken)* 2011;**63**(2):286-92.
5. Artz N, Dixon S, Wylde V, et al. Physiotherapy provision following discharge after total hip and total knee replacement: a survey of current practice at high-volume NHS hospitals in England and Wales. *Musculoskeletal Care* 2013;**11**(1):31-8.
6. Artz N, Elvers K, Minns Lowe C, et al. Effectiveness of physiotherapy exercise following total knee replacement: systematic review and meta-analysis. *BMC Musculoskeletal Disorders* 2015;**16**(15).
7. Khan F, Ng L, Gonzalez S, et al. Multidisciplinary rehabilitation programmes following joint replacement at the hip and knee in chronic arthropathy. *Cochrane Database Syst Rev* 2008(2):CD004957.
8. Turk DC, Wilson HD, Cahana A. Treatment of chronic non-cancer pain. *Lancet* 2011;**377**(9784):2226-35.
9. Higgins J, Green SE. *Cochrane Handbook for Systematic Reviews of Interventions* Version 5.1.0 [updated March 2011]. The Cochrane Collaboration, 2011. Available from [www.cochrane-handbook.org](http://www.cochrane-handbook.org), 2011.
10. Moher D, Liberati A, Tetzlaff J, et al. Preferred reporting items for systematic reviews and meta-analyses: the PRISMA statement. *BMJ* 2009;**339**:b2535.
11. Lenguerrand E, Wylde V, Gooberman-Hill R, et al. Trajectories of Pain and Function after Primary Hip and Knee Arthroplasty: The ADAPT Cohort Study. *PLoS One* 2016;**11**(2):e0149306.

12. Kennedy DM, Stratford PW, Hanna SE, et al. Modeling early recovery of physical function following hip and knee arthroplasty. *BMC Musculoskelet Disord* 2006;**7**:100.
13. Review Manager. (RevMan) [Computer program]. Version 5.3. Copenhagen: The Nordic Cochrane Centre, The Cochrane Collaboration. 2014.
14. Bruun-Olsen V, Heiberg KE, Wahl AK, et al. The immediate and long-term effects of a walking-skill program compared to usual physiotherapy care in patients who have undergone total knee arthroplasty (TKA): a randomized controlled trial. *Disability and rehabilitation* 2013;**35**(23):2008-15.
15. Buhagiar MA, Naylor JM, Harris IA, et al. Effect of Inpatient Rehabilitation vs a Monitored Home-Based Program on Mobility in Patients With Total Knee Arthroplasty: The HIHO Randomized Clinical Trial. *JAMA* 2017;**317**(10):1037-46.
16. Chen M, Li P, Lin F. Influence of structured telephone follow-up on patient compliance with rehabilitation after total knee arthroplasty. *Patient Preference and Adherence* 2016;**10**:257-64.
17. Fransen M, Nairn L, Bridgett L, et al. Post-Acute Rehabilitation After Total Knee Replacement: A Multicenter Randomized Clinical Trial Comparing Long-Term Outcomes. *Arthritis Care Res (Hoboken)* 2017;**69**(2):192-200.
18. Frost H, Lamb SE, Robertson S. A randomized controlled trial of exercise to improve mobility and function after elective knee arthroplasty. Feasibility, results and methodological difficulties. *Clinical rehabilitation* 2002;**16**(2):200-9.
19. Kauppi AM, Kyllonen E, Ohtonen P, et al. Multidisciplinary rehabilitation after primary total knee arthroplasty: a randomized controlled study of its effects on functional capacity and quality of life. *Clinical rehabilitation* 2010;**24**(5):398-411.
20. Ko V, Naylor J, Harris I, et al. One-to-one therapy is not superior to group or home-based therapy after total knee arthroplasty: a randomized, superiority trial. *The Journal of bone and joint surgery. American volume* 2013;**95**(21):1942-9.
21. Kramer JF, Speechley M, Bourne R, et al. Comparison of clinic- and home-based rehabilitation programs after total knee arthroplasty. *Clinical orthopaedics and related research* 2003(410):225-34.
22. Liebs TR, Herzberg W, Ruther W, et al. Ergometer cycling after hip or knee replacement surgery: a randomized controlled trial. *The Journal of bone and joint surgery. American volume* 2010;**92**(4):814-22.



- 1  
2  
3 23. Liebs T, Herzberg W, R  ther W, et al. Multicenter randomized controlled trial comparing  
4 early versus late aquatic therapy after total hip or knee arthroplasty. Archives of  
5 physical medicine and rehabilitation 2012; 93(2).  
6  
7 [http://onlinelibrary.wiley.com/o/cochrane/clcentral/articles/334/CN-](http://onlinelibrary.wiley.com/o/cochrane/clcentral/articles/334/CN-00832334/frame.html)  
8 [00832334/frame.html](http://onlinelibrary.wiley.com/o/cochrane/clcentral/articles/334/CN-00832334/frame.html)  
9  
10  
11 <http://ac.els-cdn.com/S0003999311008434/1-s2.0-S0003999311008434->  
12 [main.pdf?\\_tid=41aa00ce-f508-11e6-b06b-](http://ac.els-cdn.com/S0003999311008434/1-s2.0-S0003999311008434-main.pdf?_tid=41aa00ce-f508-11e6-b06b-)  
13 [00000aab0f27&acdnat=1487332829\\_31eb2562ac20096dc09cc02ed9cf1f7e.](http://ac.els-cdn.com/S0003999311008434/1-s2.0-S0003999311008434-main.pdf?_tid=41aa00ce-f508-11e6-b06b-00000aab0f27&acdnat=1487332829_31eb2562ac20096dc09cc02ed9cf1f7e)  
14  
15  
16 24. Minns Lowe CJ, Barker KL, Holder R, et al. Comparison of postdischarge physiotherapy  
17 versus usual care following primary total knee arthroplasty for osteoarthritis: an  
18 exploratory pilot randomized clinical trial. Clinical rehabilitation 2012;**26**(7):629-41.  
19  
20 25. Moffet H, Collet JP, Shapiro SH, et al. Effectiveness of intensive rehabilitation on  
21 functional ability and quality of life after first total knee arthroplasty: A single-blind  
22 randomized controlled trial. Archives of physical medicine and rehabilitation  
23 2004;**85**(4):546-56.  
24  
25  
26 26. Monticone M, Ferrante S, Rocca B, et al. Home-based functional exercises aimed at  
27 managing kinesiophobia contribute to improving disability and quality of life of  
28 patients undergoing total knee arthroplasty: a randomized controlled trial. Archives of  
29 physical medicine and rehabilitation 2013;**94**(2):231-9.  
30  
31  
32 27. Petterson SC, Mizner RL, Stevens JE, et al. Improved function from progressive  
33 strengthening interventions after total knee arthroplasty: a randomized clinical trial  
34 with an imbedded prospective cohort. Arthritis and rheumatism 2009;**61**(2):174-83.  
35  
36  
37 28. Sz  ts K, Konradsen H, Solgaard S, et al. Long-term effects of telephone follow-up after  
38 total knee arthroplasty. Journal of Nursing Education and Practice 2016;**6**(7):151-54.  
39  
40  
41 29. Vuorenmaa M, Ylinen J, Piitulainen K, et al. Efficacy of a 12-month, monitored home  
42 exercise programme compared with normal care commencing 2 months after total  
43 knee arthroplasty: a randomized controlled trial. Journal of rehabilitation medicine  
44 2014;**46**(2):166-72.  
45  
46  
47 30. Buker N, Akkaya S, Akkaya N, et al. Comparison of effects of supervised physiotherapy  
48 and a standardized home program on functional status in patients with total knee  
49 arthroplasty: a prospective study. J Phys Ther Sci 2014;**26**(10):1531-6.  
50  
51  
52 31. Harmelink KEM, Zeegers A, Tonis TM, et al. The effectiveness of the use of a digital  
53 activity coaching system in addition to a two-week home-based exercise program in  
54  
55  
56  
57  
58  
59  
60

- 1  
2  
3 patients after total knee arthroplasty: study protocol for a randomized controlled trial.  
4 BMC Musculoskelet Disord 2017;**18**(1):290.  
5
- 6 32. Negus JJ, Cawthorne DP, Chen JS, et al. Patient outcomes using Wii-enhanced  
7 rehabilitation after total knee replacement - the TKR-POWER study. Contemp Clin  
8 Trials 2015;**40**:47-53.  
9
- 10 33. Wylde V, Artz N, Marques E, et al. Effectiveness and cost-effectiveness of outpatient  
11 physiotherapy after knee replacement for osteoarthritis: study protocol for a  
12 randomised controlled trial. Trials 2016;**17**(1):289.  
13
- 14 34. Barker KL, Beard D, Price A, et al. COmmunity-based Rehabilitation after Knee  
15 Arthroplasty (CORKA): Study protocol for a randomised controlled trial. Trials  
16 2016;**17**(1):no pagination.  
17
- 18 35. Simpson AH, Hamilton DF, Beard DJ, et al. Targeted rehabilitation to improve outcome  
19 after total knee replacement (TRIO): study protocol for a randomised controlled trial.  
20 Trials 2014;**15**:44.  
21
- 22 36. Judge A, Arden NK, Cooper C, et al. Predictors of outcomes of total knee replacement  
23 surgery. Rheumatology (Oxford) 2012;**51**(10):1804-13.  
24
- 25 37. Lopez-Olivo MA, Landon GC, Siff SJ, et al. Psychosocial determinants of outcomes in  
26 knee replacement. Ann Rheum Dis 2011;**70**(10):1775-81.  
27
- 28 38. Wylde V, Dennis J, Beswick AD, et al. Systematic review of management of chronic pain  
29 after surgery. British Journal of Surgery 2017;**104**(10):1293-306.  
30
- 31 39. Blom AW, Artz N, Beswick AD, et al. Improving patients' experience and outcome of  
32 total joint replacement: the RESTORE programme. NIHR Journals Library.  
33 Southampton (UK), 2016.  
34
- 35 40. Peer MA, Rush R, Gallacher PD, et al. Pre-surgery exercise and post-operative physical  
36 function of people undergoing knee replacement surgery: A systematic review and  
37 meta-analysis of randomized controlled trials. J Rehabil Med 2017;**49**(4):304-15.  
38
- 39 41. Jordan RW, Smith NA, Chahal GS, et al. Enhanced education and physiotherapy before  
40 knee replacement; is it worth it? A systematic review. Physiotherapy  
41 2014;**100**(4):305-12.  
42
- 43 42. Wang L, Lee M, Zhang Z, et al. Does preoperative rehabilitation for patients planning to  
44 undergo joint replacement surgery improve outcomes? A systematic review and meta-  
45 analysis of randomised controlled trials. BMJ Open 2016;**6**(2):e009857.  
46  
47  
48  
49  
50  
51  
52  
53  
54  
55  
56  
57  
58  
59  
60

- 1  
2  
3 43. Chesham RA, Shanmugam S. Does preoperative physiotherapy improve postoperative,  
4 patient-based outcomes in older adults who have undergone total knee arthroplasty? A  
5 systematic review. *Physiother Theory Pract* 2017;**33**(1):9-30.  
6  
7  
8 44. Minns Lowe CJ, Barker KL, Dewey M, et al. Effectiveness of physiotherapy exercise  
9 after knee arthroplasty for osteoarthritis: systematic review and meta-analysis of  
10 randomised controlled trials. *BMJ* 2007;**335**(7624):812.  
11  
12 45. Florez-Garcia M, Garcia-Perez F, Curbelo R, et al. Efficacy and safety of home-based  
13 exercises versus individualized supervised outpatient physical therapy programs after  
14 total knee arthroplasty: a systematic review and meta-analysis. *Knee Surg Sports*  
15 *Traumatol Arthrosc* 2017;**25**(11):3340-53.  
16  
17 46. Beswick AD, Wylde V, Goberman-Hill R. Interventions for the prediction and  
18 management of chronic postsurgical pain after total knee replacement: systematic  
19 review of randomised controlled trials. *BMJ Open* 2015;**5**(5):e007387.  
20  
21 47. Wylde V, Beswick A, Dennis J, et al. Post-operative patient-related risk factors for  
22 chronic pain after total knee replacement: a systematic review. *BMJ Open* In press.  
23  
24 48. Barker KL, Beard D, Price A, et al. COmmunity-based Rehabilitation after Knee  
25 Arthroplasty (CORKA): study protocol for a randomised controlled trial. *Trials*  
26 2016;**17**(1):501.  
27  
28 49. Haroutiunian S, Nikolajsen L, Finnerup NB, et al. The neuropathic component in  
29 persistent postsurgical pain: A systematic literature review. *Pain* 2013;**154**(1):95-102.  
30  
31 50. Howells N, Murray J, Wylde V, et al. Persistent pain after knee replacement: do factors  
32 associated with pain vary with degree of patient dissatisfaction? *Osteoarthritis*  
33 *Cartilage* 2016;**24**(12):2061-68.  
34  
35 51. Mandalia V, Eyres K, Schranz P, et al. Evaluation of patients with a painful total knee  
36 replacement. *J Bone Joint Surg Br* 2008;**90**(3):265-71.  
37  
38 52. Toms AD, Mandalia V, Haigh R, et al. The management of patients with painful total  
39 knee replacement. *J Bone Joint Surg Br* 2009;**91**(2):143-50.  
40  
41 53. van Bussel CM, Stronks DL, Huygen FJ. Complex regional pain syndrome type I of the  
42 knee: a systematic literature review. *Eur J Pain* 2014;**18**(6):766-73.  
43  
44 54. Vissers MM, Bussmann JB, Verhaar JA, et al. Psychological factors affecting the  
45 outcome of total hip and knee arthroplasty: a systematic review. *Semin Arthritis*  
46 *Rheum* 2012;**41**(4):576-88.  
47  
48  
49  
50  
51  
52  
53  
54  
55  
56  
57  
58  
59  
60

- 1  
2  
3 55. Lavand'homme P, Thienpont E. Pain after total knee arthroplasty: a narrative review  
4 focusing on the stratification of patients at risk for persistent pain. Bone Joint J  
5 2015;**97-B**(10 Suppl A):45-8.  
6  
7  
8 56. Artz N, Elvers KT, Lowe CM, et al. Effectiveness of physiotherapy exercise following  
9 total knee replacement: systematic review and meta-analysis. BMC musculoskeletal  
10 disorders 2015;**16**:15.  
11  
12  
13  
14  
15  
16  
17  
18  
19  
20  
21  
22  
23  
24  
25  
26  
27  
28  
29  
30  
31  
32  
33  
34  
35  
36  
37  
38  
39  
40  
41  
42  
43  
44  
45  
46  
47  
48  
49  
50  
51  
52  
53  
54  
55  
56  
57  
58  
59  
60

For peer review only

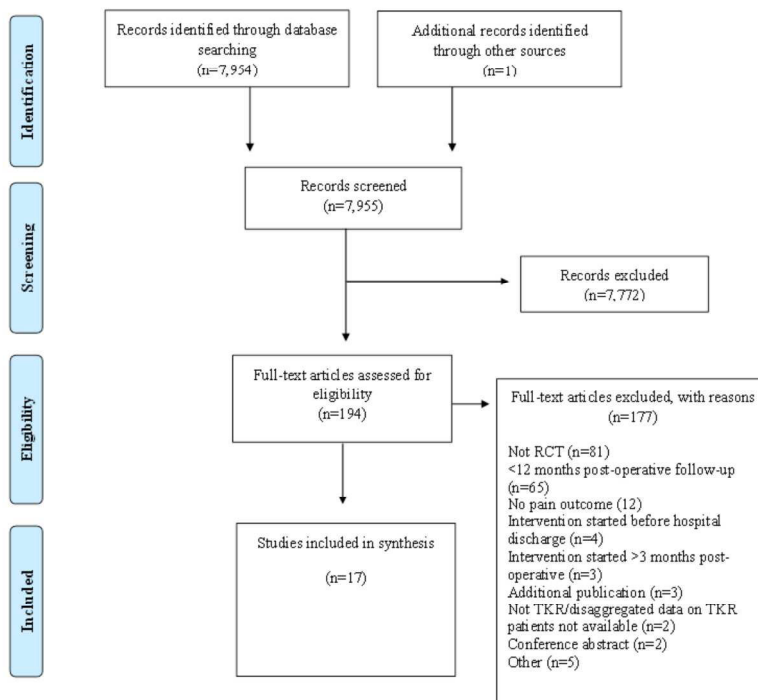

Figure 1: Systematic review flow diagram

254x190mm (300 x 300 DPI)

1  
2  
3  
4  
5  
6  
7  
8  
9  
10  
11  
12  
13  
14  
15  
16  
17  
18  
19  
20  
21  
22  
23  
24  
25  
26  
27  
28  
29  
30  
31  
32  
33  
34  
35  
36  
37  
38  
39  
40  
41  
42  
43  
44  
45  
46  
47  
48  
49  
50  
51  
52  
53  
54  
55  
56  
57  
58  
59  
60

|                  | Random sequence generation (selection bias) | Allocation concealment (selection bias) | Blinding of participants and personnel (performance bias) | Blinding of outcome assessment (detection bias) | Incomplete outcome data (attrition bias) | Selective reporting (reporting bias) | Other bias |
|------------------|---------------------------------------------|-----------------------------------------|-----------------------------------------------------------|-------------------------------------------------|------------------------------------------|--------------------------------------|------------|
| Bruun-Olsen 2013 | +                                           | +                                       | -                                                         | -                                               | +                                        | +                                    | +          |
| Buhagiar 2017    | +                                           | +                                       | -                                                         | -                                               | +                                        | +                                    | +          |
| Büker 2014       | ?                                           | ?                                       | -                                                         | -                                               | ?                                        | ?                                    | +          |
| Chen 2016        | +                                           | +                                       | -                                                         | -                                               | +                                        | ?                                    | +          |
| Fransen 2017     | +                                           | +                                       | -                                                         | -                                               | +                                        | +                                    | +          |
| Frost 2002       | +                                           | ?                                       | -                                                         | -                                               | -                                        | ?                                    | +          |
| Kauppila 2010    | +                                           | +                                       | -                                                         | -                                               | +                                        | +                                    | +          |
| Ko 2013          | +                                           | +                                       | -                                                         | -                                               | +                                        | +                                    | +          |
| Kramer 2003      | ?                                           | ?                                       | -                                                         | -                                               | +                                        | +                                    | +          |
| Liebs 2010       | +                                           | +                                       | -                                                         | -                                               | -                                        | +                                    | +          |
| Liebs 2012       | +                                           | +                                       | -                                                         | -                                               | -                                        | ?                                    | +          |
| Minns Lowe 2012  | +                                           | +                                       | -                                                         | -                                               | +                                        | +                                    | +          |
| Moffet 2004      | +                                           | +                                       | -                                                         | -                                               | -                                        | ?                                    | +          |
| Monticone 2013   | +                                           | +                                       | -                                                         | -                                               | +                                        | ?                                    | +          |
| Petterson 2009   | ?                                           | ?                                       | -                                                         | -                                               | -                                        | -                                    | +          |
| Szots 2016       | +                                           | +                                       | -                                                         | -                                               | +                                        | +                                    | +          |
| Vuormaa 2014     | +                                           | +                                       | -                                                         | -                                               | +                                        | +                                    | +          |

Figure 2: Risk of bias assessment for individual studies

211x535mm (300 x 300 DPI)

## Appendix 1: PRISMA checklist

| Section/topic                      | #  | Checklist item                                                                                                                                                                                                                                                                                              | Reported on page # |
|------------------------------------|----|-------------------------------------------------------------------------------------------------------------------------------------------------------------------------------------------------------------------------------------------------------------------------------------------------------------|--------------------|
| <b>TITLE</b>                       |    |                                                                                                                                                                                                                                                                                                             |                    |
| Title                              | 1  | Identify the report as a systematic review, meta-analysis, or both.                                                                                                                                                                                                                                         | 1                  |
| <b>ABSTRACT</b>                    |    |                                                                                                                                                                                                                                                                                                             |                    |
| Structured summary                 | 2  | Provide a structured summary including, as applicable: background; objectives; data sources; study eligibility criteria, participants, and interventions; study appraisal and synthesis methods; results; limitations; conclusions and implications of key findings; systematic review registration number. | 2-3                |
| <b>INTRODUCTION</b>                |    |                                                                                                                                                                                                                                                                                                             |                    |
| Rationale                          | 3  | Describe the rationale for the review in the context of what is already known.                                                                                                                                                                                                                              | 4                  |
| Objectives                         | 4  | Provide an explicit statement of questions being addressed with reference to participants, interventions, comparisons, outcomes, and study design (PICOS).                                                                                                                                                  | 4-5                |
| <b>METHODS</b>                     |    |                                                                                                                                                                                                                                                                                                             |                    |
| Protocol and registration          | 5  | Indicate if a review protocol exists, if and where it can be accessed (e.g., Web address), and, if available, provide registration information including registration number.                                                                                                                               | 5                  |
| Eligibility criteria               | 6  | Specify study characteristics (e.g., PICOS, length of follow-up) and report characteristics (e.g., years considered, language, publication status) used as criteria for eligibility, giving rationale.                                                                                                      | 5-6                |
| Information sources                | 7  | Describe all information sources (e.g., databases with dates of coverage, contact with study authors to identify additional studies) in the search and date last searched.                                                                                                                                  | 6                  |
| Search                             | 8  | Present full electronic search strategy for at least one database, including any limits used, such that it could be repeated.                                                                                                                                                                               | Appendix 2         |
| Study selection                    | 9  | State the process for selecting studies (i.e., screening, eligibility, included in systematic review, and, if applicable, included in the meta-analysis).                                                                                                                                                   | 6-7                |
| Data collection process            | 10 | Describe method of data extraction from reports (e.g., piloted forms, independently, in duplicate) and any processes for obtaining and confirming data from investigators.                                                                                                                                  | 6-7                |
| Data items                         | 11 | List and define all variables for which data were sought (e.g., PICOS, funding sources) and any assumptions and simplifications made.                                                                                                                                                                       | 6-7                |
| Risk of bias in individual studies | 12 | Describe methods used for assessing risk of bias of individual studies (including specification of whether this was done at the study or outcome level), and how this information is to be used in any data synthesis.                                                                                      | 7                  |
| Summary measures                   | 13 | State the principal summary measures (e.g., risk ratio, difference in means).                                                                                                                                                                                                                               | 7                  |
| Synthesis of results               | 14 | Describe the methods of handling data and combining results of studies, if done, including measures of consistency (e.g., $I^2$ ) for each meta-analysis.                                                                                                                                                   | 7                  |

**Appendix 1: PRISMA checklist**

| Section/topic                 | #  | Checklist item                                                                                                                                                                                           | Reported on page #         |
|-------------------------------|----|----------------------------------------------------------------------------------------------------------------------------------------------------------------------------------------------------------|----------------------------|
| Risk of bias across studies   | 15 | Specify any assessment of risk of bias that may affect the cumulative evidence (e.g., publication bias, selective reporting within studies).                                                             | 7                          |
| Additional analyses           | 16 | Describe methods of additional analyses (e.g., sensitivity or subgroup analyses, meta-regression), if done, indicating which were pre-specified.                                                         | 7                          |
| <b>RESULTS</b>                |    |                                                                                                                                                                                                          |                            |
| Study selection               | 17 | Give numbers of studies screened, assessed for eligibility, and included in the review, with reasons for exclusions at each stage, ideally with a flow diagram.                                          | Figure 1                   |
| Study characteristics         | 18 | For each study, present characteristics for which data were extracted (e.g., study size, PICOS, follow-up period) and provide the citations.                                                             | Table 1                    |
| Risk of bias within studies   | 19 | Present data on risk of bias of each study and, if available, any outcome level assessment (see item 12).                                                                                                | Table 2                    |
| Results of individual studies | 20 | For all outcomes considered (benefits or harms), present, for each study: (a) simple summary data for each intervention group (b) effect estimates and confidence intervals, ideally with a forest plot. | Figure 3, Appendix 3 and 4 |
| Synthesis of results          | 21 | Present results of each meta-analysis done, including confidence intervals and measures of consistency.                                                                                                  | N/A                        |
| Risk of bias across studies   | 22 | Present results of any assessment of risk of bias across studies (see Item 15).                                                                                                                          | Table 2                    |
| Additional analysis           | 23 | Give results of additional analyses, if done (e.g., sensitivity or subgroup analyses, meta-regression [see Item 16]).                                                                                    | N/A                        |
| <b>DISCUSSION</b>             |    |                                                                                                                                                                                                          |                            |
| Summary of evidence           | 24 | Summarize the main findings including the strength of evidence for each main outcome; consider their relevance to key groups (e.g., healthcare providers, users, and policy makers).                     | 12-15                      |
| Limitations                   | 25 | Discuss limitations at study and outcome level (e.g., risk of bias), and at review-level (e.g., incomplete retrieval of identified research, reporting bias).                                            | 12-13                      |
| Conclusions                   | 26 | Provide a general interpretation of the results in the context of other evidence, and implications for future research.                                                                                  | 13-15                      |
| <b>FUNDING</b>                |    |                                                                                                                                                                                                          |                            |
| Funding                       | 27 | Describe sources of funding for the systematic review and other support (e.g., supply of data); role of funders for the systematic review.                                                               | 16                         |



## Appendix 2: Search terms

### MEDLINE (Ovid) (1946 to 15 November 2016)

- 1 randomized controlled trial/ or randomized controlled trial.pt.
- 2 controlled clinical trial.pt.
- 3 randomized.ab.
- 4 placebo.ab.
- 5 randomly.ab
- 6 trial.ab
- 7 randomised.tw
- 8 1 or 2 or 3 or 4 or 5 or 6 or 7
- 9 review/
- 10 'systematic review\$.mp
- 11 9 or 10
- 12 8 or 11
- 13 Arthroplasty, Replacement, Knee/
- 14 Knee Prosthesis/
- 15 (arthoplast\$ adj3 knee\$.mp. [mp=title, abstract, original title, name of substance word, subject heading word, keyword heading word, protocol supplementary concept word, rare disease supplementary concept word, unique identifier]
- 16 (knee\$ adj3 replac\$.mp. [mp=title, abstract, original title, name of substance word, subject heading word, keyword heading word, protocol supplementary concept word, rare disease supplementary concept word, unique identifier]
- 17 (knee adj3 implant\$.mp. [mp=title, abstract, original title, name of substance word, subject heading word, keyword heading word, protocol supplementary concept word, rare disease supplementary concept word, unique identifier]
- 18 13 or 14 or 15 or 16 or 17
- 19 12 and 18

### EMBASE (Ovid) (1980 to 15 November 2016)

- 1 Randomized controlled trial/ or Randomization/ or Single blind procedure/ or Double blind procedure/ or Crossover procedure/ or Placebo/ or Randomised controlled trial\$.tw. or Randomized controlled trial\$.tw. or RCT.tw. or Random allocation.tw. or Randomly allocated.tw. or Allocated randomly.tw. or (allocated adj2 random).tw. or Single blind\$.tw. or Double blind\$.tw. or ((treble or triple) adj blind\$.tw. or Placebo\$.tw.
- 2 "systematic review"/
- 3 meta analysis/

- 1  
2  
3 4 2 or 3  
4  
5 5 1 or 4  
6 6 knee arthroplasty/  
7  
8 7 total knee arthroplasty/  
9  
10 8 knee prosthesis/  
11 9 (knee\$ adj3 arthoplast\$).mp. [mp=title, abstract, heading word, drug trade name, original title, device  
12 manufacturer, drug manufacturer, device trade name, keyword, floating subheading]  
13  
14 10 (knee\$ adj3 replac\$).mp. [mp=title, abstract, heading word, drug trade name, original title, device  
15 manufacturer, drug manufacturer, device trade name, keyword, floating subheading]  
16  
17 11 (knee\$ adj3 implant\$).mp. [mp=title, abstract, heading word, drug trade name, original title, device  
18 manufacturer, drug manufacturer, device trade name, keyword, floating subheading]  
19  
20 12 6 or 7 or 8 or 9 or 10 or 11  
21  
22 13 5 and 12  
23  
24

### **PsycINFO (Ovid) (inception [1806] to 15 November 2016)**

- 25  
26  
27 1. (knee\$ adj3 arthoplast\$).mp. [mp=title, abstract, heading word, table of contents, key concepts, original title,  
28 tests & measures]  
29  
30 2. (knee\$ adj3 replac\$).mp. [mp=title, abstract, heading word, table of contents, key concepts, original title, tests  
31 & measures]  
32  
33 3. (knee\$ adj3 surg\$).mp. [mp=title, abstract, heading word, table of contents, key concepts, original title, tests  
34 & measures]  
35  
36 4. (knee\$ adj3 implant\$).mp. [mp=title, abstract, heading word, table of contents, key concepts, original title,  
37 tests & measures]  
38  
39 5. (knee adj3 prosthe\$).mp. [mp=title, abstract, heading word, table of contents, key concepts, original title, tests  
40 & measures]  
41  
42 6. 1 or 2 or 3 or 4 or 5  
43

### **The Cochrane Library (Wiley) (inception to 15 November 2016)**

- 44  
45  
46  
47 #1 MeSH descriptor: [Knee Prosthesis] explode all trees  
48  
49 #2 MeSH descriptor: [Arthroplasty, Replacement, Knee] explode all trees  
50  
51 #3 arthoplast\* N3 knee\*  
52  
53 #4 knee\* N3 replac\*  
54  
55 #5 knee\* N3 implant\*  
56  
57 #6 #1 or #2 or #3 or #4 or #5  
58  
59  
60

**CINAHL (EBSCOHOST) (1982 to 15 November 2016)**

- 1  
2  
3  
4  
5  
6  
7  
8  
9  
10 S25 S15 AND S23 Limiters - Exclude MEDLINE records  
11 S24 S15 AND S23  
12  
13 S23 S16 OR S17 OR S18 OR S19 OR S20 OR S21 OR S22  
14  
15 S22 knee\* N3 implant\*  
16  
17 S21 knee\* N3 arthoplast\*  
18 S20 arthoplast\* N3 knee\*  
19  
20 S19 knee\* N3 replac\*  
21  
22 S18 "knee prosthes\*"  
23  
24 S17 MH "Knee surgery"  
25 S16 MH "Arthroplasty, Replacement, Knee"  
26  
27 S15 (S8 OR S14)  
28 S14 (S9 OR S10 OR S11 OR S12 OR S13)  
29  
30 S13 metaanalyses  
31  
32 S12 metaanalysis  
33  
34 S11 meta-analyses  
35  
36 S10 meta-analysis  
37  
38 S9 systematic review  
39  
40 S8 S1 OR S2 OR S3 OR S4 OR S5 OR S6 OR S7  
41  
42 S7 AB trial\$  
43  
44 S6 AB randomly  
45  
46 S5 AB randomised OR randomized  
47  
48 S4 (MH "clinical trials")  
49  
50 S3 clinical trials  
51  
52 S2 (MH "randomized controlled trials")  
53  
54 S1 randomized controlled trials  
55  
56  
57  
58  
59  
60

## Appendix 3: Trial results summary

| Study                   | Primary aim of the study                                                                                                                                                | Primary outcome (and measure)         | Results summary                                                                                                                                                                                                                                                                                                                                                                                                                                   |
|-------------------------|-------------------------------------------------------------------------------------------------------------------------------------------------------------------------|---------------------------------------|---------------------------------------------------------------------------------------------------------------------------------------------------------------------------------------------------------------------------------------------------------------------------------------------------------------------------------------------------------------------------------------------------------------------------------------------------|
| Bruun-Olsen et al, 2013 | To examine the immediate and long-term effects of a walking-skill program compared with usual physiotherapy care.                                                       | Walking distance (6 minute walk test) | <p>No significant difference in mean <u>0-100</u> KOOS pain scores (p-value not reported):<br/>           Intervention: 82 (SD 21)<br/>           Control: 74 (SD 23)</p> <p><u>Mean change from baseline (6 weeks post-operative):</u><br/> <u>Intervention: 21</u><br/> <u>Control: 20</u></p>                                                                                                                                                  |
| Buhagiar et al, 2017    | To determine if 10 days of inpatient rehabilitation followed by a monitored home-based program provided greater improvements than a monitored home-based program alone. | Walking distance (6 minute walk test) | <p>No significant difference in median <u>0-100</u> KOOS pain scores between groups (p-value not reported):<br/>           Intervention: 86 (IQR 74 to 97)<br/>           Control: 91 (IQR 78-98)</p> <p><u>Mean change from baseline (pre-surgery):</u><br/> <u>Intervention: 53</u><br/> <u>Control: 55</u></p>                                                                                                                                 |
| Buker et al, 2014       | Determine the functional differences between patients who were treated with supervised physiotherapy or a standardized home program and perform a cost analysis.        | Not specified                         | <p>No significant difference in mean pain <u>0-10</u> VAS scores (p-value not reported):<br/>           Rest pain - Intervention: 0.44 (SD 0.51); Control: 0.37 (SD 0.80)<br/>           Activity pain - Intervention: 3.11 (SD 1.96); Control: 2.50 (SD 1.77)</p> <p><u>Mean change from baseline (pre-surgery):</u><br/> <u>Rest pain - Intervention: 4.86; Control: 4.78</u><br/> <u>Activity pain - Intervention: 6.14; Control: 5.46</u></p> |
| Chen et al, 2016        | To assess the impact of structured telephone reinforcement on patient                                                                                                   | Not specified (pilot study)           | No significant difference in mean <u>0-100</u> VAS pain scores (p-value not reported):                                                                                                                                                                                                                                                                                                                                                            |

## Appendix 3: Trial results summary

| Study                | Primary aim of the study                                                                                                                                                                           | Primary outcome (and measure)                      | Results summary                                                                                                                                                                                                                                            |
|----------------------|----------------------------------------------------------------------------------------------------------------------------------------------------------------------------------------------------|----------------------------------------------------|------------------------------------------------------------------------------------------------------------------------------------------------------------------------------------------------------------------------------------------------------------|
|                      | compliance with home exercises.                                                                                                                                                                    |                                                    | Intervention: 8.7 (SD 5.1)<br>Control: 9.3 (SD 5.5)<br><br><u>Mean change from baseline (pre-surgery):</u><br><u>Intervention: 63.5</u><br><u>Control: 63.8</u>                                                                                            |
| Fransen et al, 2017  | To evaluate the long-term benefit of providing a post-acute, class-based outpatient exercise program compared with current usual rehabilitation care.                                              | Pain and function (WOMAC pain and function scales) | No significant difference in mean <u>0-20</u> WOMAC pain scores (p=0.71):<br>Intervention: 2.6 (SE 0.2)<br>Control: 2.5 (SE 0.2)<br><br><u>Mean change from baseline (pre-surgery):</u><br><u>Intervention: 8.7</u><br><u>Control: 8.5</u>                 |
| Frost et al, 2002    | To assess the feasibility of comparing traditional exercise regimes with a more functional and dynamic approach.                                                                                   | Not specified (feasibility study)                  | No significant difference in mean <u>1-5</u> OKS item 'pain on walking' scores (p=0.68):<br>Intervention: 1.6 (SD 0.8)<br>Control: 1.5 (SD 0.93)<br><br><u>Mean change from baseline (pre-surgery):</u><br><u>Intervention: 2.6</u><br><u>Control: 2.8</u> |
| Kauppila et al, 2010 | To examine whether a multidisciplinary rehabilitation programme can improve functional recovery and quality of life and reduce the use of rehabilitation services compared with conventional care. | Function (WOMAC function scale)                    | No significant difference in mean <u>0-100</u> WOMAC pain scores (p=0.17):<br>Intervention: 23.5 (SD 22.3)<br>Control: 19.3 (SD 17.5)<br><br><u>Mean change from baseline (pre-surgery):</u>                                                               |

## Appendix 3: Trial results summary

| Study              | Primary aim of the study                                                                                                                                                              | Primary outcome (and measure)         | Results summary                                                                                                                                                                                                                                                                                                                                            |
|--------------------|---------------------------------------------------------------------------------------------------------------------------------------------------------------------------------------|---------------------------------------|------------------------------------------------------------------------------------------------------------------------------------------------------------------------------------------------------------------------------------------------------------------------------------------------------------------------------------------------------------|
|                    |                                                                                                                                                                                       |                                       | <u>Intervention: 39.3</u><br><u>Control: 37.1</u>                                                                                                                                                                                                                                                                                                          |
| Ko et al, 2013     | To determine whether center-based, one-to-one physical therapy provides superior outcomes compared with group-based therapy or a simple monitored home-based program.                 | Pain and function (Oxford Knee Score) | No significant difference in mean <u>0-50</u> WOMAC pain scores (p=0.79):<br>1:1 sessions: Median 3.8 (IQR 0.5-9.6)<br>Group sessions: Median 1.6 (IQR 0-7.5)<br>Home programme: Median 2.5 (IQR 0-9.5)<br><br><u>Mean change from baseline (pre-surgery):</u><br><u>1:1 sessions: 25.65</u><br><u>Group sessions: 18.4</u><br><u>Home programme: 25.7</u> |
| Kramer et al, 2003 | To compare clinic-based rehabilitation delivered in outpatient physical therapy clinics and home-based rehabilitation monitored by a physical therapist via periodic telephone calls. | Not specified                         | No significant difference in mean WOMAC pain scores (p-value and mean pain scores not reported)                                                                                                                                                                                                                                                            |
| Liebs et al, 2010  | Evaluate the effect of ergometer cycling on health-related quality of life and patient satisfaction.                                                                                  | Function (WOMAC function scale)       | No significant difference in mean <u>0-100</u> WOMAC pain scores (p=0.454):<br>Intervention: 15.6 (SD 17.9)<br>Control: 13.0 (SD 14.9)<br><br><u>Mean change from baseline (pre-surgery):</u><br><u>Intervention: 38.8</u><br><u>Control: 41.1</u>                                                                                                         |
| Liebs et al, 2012  | To evaluate if the timing of aquatic therapy influences clinical outcomes.                                                                                                            | Function (WOMAC function scale)       | No significant difference in mean <u>0-100</u> WOMAC pain scores (p=0.334):<br>Intervention: 13.2 (SD 15.0)<br>Control: 17.4 (SD 22.4)                                                                                                                                                                                                                     |

## Appendix 3: Trial results summary

| Study                  | Primary aim of the study                                                                                                                                                                                                                       | Primary outcome (and measure)         | Results summary                                                                                                                                                                                                                                                                                       |
|------------------------|------------------------------------------------------------------------------------------------------------------------------------------------------------------------------------------------------------------------------------------------|---------------------------------------|-------------------------------------------------------------------------------------------------------------------------------------------------------------------------------------------------------------------------------------------------------------------------------------------------------|
|                        |                                                                                                                                                                                                                                                |                                       | <u>Mean change from baseline (pre-surgery):</u><br><u>Intervention: 39.9</u><br><u>Control: 32.8</u>                                                                                                                                                                                                  |
| Minns Lowe et al, 2012 | To evaluate a pilot trial of a postdischarge physiotherapy intervention to improve patient function versus usual physiotherapy.                                                                                                                | Pain and function (Oxford Knee Score) | No statistical comparison of median <u>0-100</u> KOOS pain scores (pilot study):<br>Intervention: 80.6 (IQ 36)<br>Control: 90.3 (IQ 33)<br><br><u>Mean change from baseline (pre-surgery):</u><br><u>Intervention: 39.5</u><br><u>Control: 51.4</u>                                                   |
| Moffet et al, 2004     | To evaluate the effectiveness of a new intensive functional rehabilitation program on functional ability and quality of life.                                                                                                                  | Walking distance (6 minute walk test) | No significant difference in mean <u>0-100</u> WOMAC pain scores (p=0.161):<br>Intervention: 9.4 (SD 12.4)<br>Control: 11.8 (SD 13.0)<br><br><u>Mean change from baseline (2 months post-operative):</u><br><u>Intervention: 19</u><br><u>Control: 10.8</u>                                           |
| Monticone et al, 2013  | To compare the improvement in disability, kinesiophobia, pain, and quality of life obtained by means of home-based functional exercises aimed at managing kinesiophobia with advice to stay active after discharge from a rehabilitation unit. | Pain and function (KOOS)              | Mean <u>0-100</u> KOOS pain score significantly lower in intervention group (p<0.001):<br>Intervention: 87.35 (SD 11.71)<br>Control: 77.38 (SD 15.07)<br><br><u>Mean change from baseline (before discharge from the rehabilitation unit):</u><br><u>Intervention: 41.95</u><br><u>Control: 34.64</u> |
| Petterson et al, 2009  | To determine the effectiveness of progressive quadriceps strengthening                                                                                                                                                                         | Quadriceps strength and volitional    | No significant difference in mean <u>0-5</u> KOS ADL item 'affect of pain on function' (p value not reported):                                                                                                                                                                                        |

## Appendix 3: Trial results summary

| Study                 | Primary aim of the study                                                                 | Primary outcome (and measure)                       | Results summary                                                                                                                                                                                                               |
|-----------------------|------------------------------------------------------------------------------------------|-----------------------------------------------------|-------------------------------------------------------------------------------------------------------------------------------------------------------------------------------------------------------------------------------|
|                       | with or without neuromuscular electrical stimulation (NMES).                             | muscle activation (burst superimposition technique) | Intervention: 0.82 (SD not reported)<br>Control: 0.89 (SD not reported)<br><br><u>Mean change from baseline (3-4 weeks post-operative):</u><br><u>Intervention: 1.42</u><br><u>Control: 1.55</u>                              |
| Szots et al, 2016     | To evaluate the effects of structured nurse-managed telephone follow-up.                 | Function (WOMAC function scale)                     | No significant difference in mean change in <u>0-100 WOMAC pain scores from baseline (3 days post hospital discharge)</u> (p=0.329):<br>Intervention: -25.9 (95% CI = -30.8, -21.0)<br>Control: -29.5 (95% CI = -35.2, -23.8) |
| Vuorenmaa et al, 2014 | To evaluate the efficacy of a delayed home exercise programme compared with normal care. | Pain (WOMAC pain scale)                             | No significant difference in mean change in <u>0-100 WOMAC pain scores from baseline (2 months post-operative)</u> (p=0.70):<br>Intervention: -15 (95% CI -20 to -10)<br>Control: -14 (95% CI -19 to -9)                      |



#### Appendix 4: Adverse event reporting and findings

| Publication             | Adverse events assessment/definition                                                                                                                                                   | Results summary                                                                                                                                                                                                                                                                                                           |
|-------------------------|----------------------------------------------------------------------------------------------------------------------------------------------------------------------------------------|---------------------------------------------------------------------------------------------------------------------------------------------------------------------------------------------------------------------------------------------------------------------------------------------------------------------------|
| Buker et al, 2014       | None                                                                                                                                                                                   |                                                                                                                                                                                                                                                                                                                           |
| Bruun-Olsen et al, 2013 | None                                                                                                                                                                                   |                                                                                                                                                                                                                                                                                                                           |
| Buhagiar et al, 2017    | Postdischarge complication and adverse event data were collected until 1 year after surgery by self-report at follow-up visits and by a review of hospital electronic medical records. | Detailed breakdown of post-operative complications is provided in Table 3. There were no significant between-group differences in emergency department visits, readmissions and manipulations under anaesthetic.                                                                                                          |
| Chen et al, 2016        | None                                                                                                                                                                                   |                                                                                                                                                                                                                                                                                                                           |
| Fransen et al, 2017     | Adverse events defined as event resulting in readmission to the hospital or resulting in a medical intervention or reduced function for 3 or more days.                                | Intervention: 1 death, 24 hospital admissions (15 TKR related), 20 other adverse events<br>Control: 1 death, 16 hospital admissions (13 TKR related), 17 other adverse events                                                                                                                                             |
| Frost et al, 2002       | None                                                                                                                                                                                   |                                                                                                                                                                                                                                                                                                                           |
| Kauppila et al, 2010    | Not stated                                                                                                                                                                             | No adverse events due to the intervention were reported                                                                                                                                                                                                                                                                   |
| Ko et al, 2013          | Postoperative adverse events were monitored via treating therapists and documented by the blinded assessor.                                                                            | Detailed breakdown of post-operative adverse events provided in Appendix 1. Superficial wound infection, major infection, venous thrombotic embolism, neurovascular, TKR-related readmission and manipulation under anaesthetic similar between groups. No adverse events were associated with any of the treatment arms. |
| Kramer et al, 2003      | None                                                                                                                                                                                   |                                                                                                                                                                                                                                                                                                                           |
| Liebs et al, 2010       | Not stated                                                                                                                                                                             | Prevalence of postoperative complications was similar between groups.                                                                                                                                                                                                                                                     |
| Liebs et al, 2012       | Not stated                                                                                                                                                                             | 5 patients in early aquatic therapy group and 1 patient in the late aquatic therapy group admitted to hospital within 3 months of surgery.                                                                                                                                                                                |
| Minns Lowe et al, 2012  | Not stated                                                                                                                                                                             | No adverse events                                                                                                                                                                                                                                                                                                         |
| Moffet et al, 2004      | Not stated                                                                                                                                                                             | No adverse events                                                                                                                                                                                                                                                                                                         |
| Monticone et al, 2013   | None                                                                                                                                                                                   |                                                                                                                                                                                                                                                                                                                           |
| Petterson et al, 2009   | Not stated                                                                                                                                                                             | No adverse events were related to the                                                                                                                                                                                                                                                                                     |

|                       |            |                                                                                                                                                                                                                                                         |
|-----------------------|------------|---------------------------------------------------------------------------------------------------------------------------------------------------------------------------------------------------------------------------------------------------------|
|                       |            | exercise intervention. Only 1 patient reported feeling dizzy and lightheaded following the first NMES treatment.                                                                                                                                        |
| Szots et al, 2016     | None       |                                                                                                                                                                                                                                                         |
| Vuorenmaa et al, 2014 | Not stated | Intervention: 5 patients discontinued training due to pain (2 reported knee pain on operated side, 1 reported knee pain on the contralateral side, 1 reported back pain, and 1 reported hip pain), 1 patient had surgery due to reduced range of motion |

For peer review only
