# Supplementary material for: Effectiveness of postdischarge interventions for reducing the severity of chronic pain after total knee replacement: systematic review of randomised controlled trials
Source: PubMed Central journal article supplement (PMC5855247; doi:10.1136/bmjopen-2017-020368), 2018-02-28
Supplement: bmjopen-2017-020368supp002.pdf [file bmjopen-2017-020368supp002.pdf]

## Appendix 2: Search terms

### MEDLINE (Ovid) (1946 to 15 November 2016)

- 1 randomized controlled trial/ or randomized controlled trial.pt.
- 2 controlled clinical trial.pt.
- 3 randomized.ab.
- 4 placebo.ab.
- 5 randomly.ab
- 6 trial.ab
- 7 randomised.tw
- 8 1 or 2 or 3 or 4 or 5 or 6 or 7
- 9 review/
- 10 'systematic review\$.mp
- 11 9 or 10
- 12 8 or 11
- 13 Arthroplasty, Replacement, Knee/
- 14 Knee Prosthesis/
- 15 (arthoplast\$ adj3 knee\$.mp. [mp=title, abstract, original title, name of substance word, subject heading word, keyword heading word, protocol supplementary concept word, rare disease supplementary concept word, unique identifier]
- 16 (knee\$ adj3 replac\$.mp. [mp=title, abstract, original title, name of substance word, subject heading word, keyword heading word, protocol supplementary concept word, rare disease supplementary concept word, unique identifier]
- 17 (knee adj3 implant\$.mp. [mp=title, abstract, original title, name of substance word, subject heading word, keyword heading word, protocol supplementary concept word, rare disease supplementary concept word, unique identifier]
- 18 13 or 14 or 15 or 16 or 17
- 19 12 and 18

### EMBASE (Ovid) (1980 to 15 November 2016)

- 1 Randomized controlled trial/ or Randomization/ or Single blind procedure/ or Double blind procedure/ or Crossover procedure/ or Placebo/ or Randomised controlled trial\$.tw. or Randomized controlled trial\$.tw. or RCT.tw. or Random allocation.tw. or Randomly allocated.tw. or Allocated randomly.tw. or (allocated adj2 random).tw. or Single blind\$.tw. or Double blind\$.tw. or ((treble or triple) adj blind\$.tw. or Placebo\$.tw.
- 2 "systematic review"/
- 3 meta analysis/

- 4        2 or 3
- 5        1 or 4
- 6        knee arthroplasty/
- 7        total knee arthroplasty/
- 8        knee prosthesis/
- 9        (knee\$ adj3 arthoplast\$).mp. [mp=title, abstract, heading word, drug trade name, original title, device manufacturer, drug manufacturer, device trade name, keyword, floating subheading]
- 10       (knee\$ adj3 replac\$).mp. [mp=title, abstract, heading word, drug trade name, original title, device manufacturer, drug manufacturer, device trade name, keyword, floating subheading]
- 11       (knee\$ adj3 implant\$).mp. [mp=title, abstract, heading word, drug trade name, original title, device manufacturer, drug manufacturer, device trade name, keyword, floating subheading]
- 12       6 or 7 or 8 or 9 or 10 or 11
- 13       5 and 12

**PsycINFO (Ovid) (inception [1806] to 15 November 2016)**

- 1. (knee\$ adj3 arthoplast\$).mp. [mp=title, abstract, heading word, table of contents, key concepts, original title, tests & measures]
- 2. (knee\$ adj3 replac\$).mp. [mp=title, abstract, heading word, table of contents, key concepts, original title, tests & measures]
- 3. (knee\$ adj3 surg\$).mp. [mp=title, abstract, heading word, table of contents, key concepts, original title, tests & measures]
- 4. (knee\$ adj3 implant\$).mp. [mp=title, abstract, heading word, table of contents, key concepts, original title, tests & measures]
- 5. (knee adj3 prosthe\$).mp. [mp=title, abstract, heading word, table of contents, key concepts, original title, tests & measures]
- 6. 1 or 2 or 3 or 4 or 5

**The Cochrane Library (Wiley) (inception to 15 November 2016)**

- #1       MeSH descriptor: [Knee Prosthesis] explode all trees
- #2       MeSH descriptor: [Arthroplasty, Replacement, Knee] explode all trees
- #3       arthoplast\* N3 knee\*
- #4       knee\* N3 replac\*
- #5       knee\* N3 implant\*
- #6       #1 or #2 or #3 or #4 or #5

## CINAHL (EBSCOHOST) (1982 to 15 November 2016)

- S25 S15 AND S23 Limiters - Exclude MEDLINE records
- S24 S15 AND S23
- S23 S16 OR S17 OR S18 OR S19 OR S20 OR S21 OR S22
- S22 knee\* N3 implant\*
- S21 knee\* N3 arthoplast\*
- S20 arthoplast\* N3 knee\*
- S19 knee\* N3 replac\*
- S18 "knee prostheses"
- S17 MH "Knee surgery"
- S16 MH "Arthroplasty, Replacement, Knee"
- S15 (S8 OR S14)
- S14 (S9 OR S10 OR S11 OR S12 OR S13)
- S13 metaanalyses
- S12 metaanalysis
- S11 meta-analyses
- S10 meta-analysis
- S9 systematic review
- S8 S1 OR S2 OR S3 OR S4 OR S5 OR S6 OR S7
- S7 AB trial\$
- S6 AB randomly
- S5 AB randomised OR randomized
- S4 (MH "clinical trials")
- S3 clinical trials
- S2 (MH "randomized controlled trials")
- S1 randomized controlled trials
