# Supplementary material for: Effectiveness of postdischarge interventions for reducing the severity of chronic pain after total knee replacement: systematic review of randomised controlled trials
Source: PubMed Central journal article supplement (PMC5855247; doi:10.1136/bmjopen-2017-020368), 2018-02-28
Supplement: bmjopen-2017-020368supp003.pdf [file bmjopen-2017-020368supp003.pdf]

### Appendix 3: Trial results summary

| Study                   | Primary aim of the study                                                                                                                                                | Primary outcome (and measure)         | Results summary                                                                                                                                                                                                                                                                                                                                                                                                |
|-------------------------|-------------------------------------------------------------------------------------------------------------------------------------------------------------------------|---------------------------------------|----------------------------------------------------------------------------------------------------------------------------------------------------------------------------------------------------------------------------------------------------------------------------------------------------------------------------------------------------------------------------------------------------------------|
| Bruun-Olsen et al, 2013 | To examine the immediate and long-term effects of a walking-skill program compared with usual physiotherapy care.                                                       | Walking distance (6 minute walk test) | No significant difference in mean <u>0-100</u> KOOS pain scores (p-value not reported):<br>Intervention: 82 (SD 21)<br>Control: 74 (SD 23)<br><br><u>Mean change from baseline (6 weeks post-operative):</u><br><u>Intervention: 21</u><br><u>Control: 20</u>                                                                                                                                                  |
| Buhagiar et al, 2017    | To determine if 10 days of inpatient rehabilitation followed by a monitored home-based program provided greater improvements than a monitored home-based program alone. | Walking distance (6 minute walk test) | No significant difference in median <u>0-100</u> KOOS pain scores between groups (p-value not reported):<br>Intervention: 86 (IQR 74 to 97)<br>Control: 91 (IQR 78-98)<br><br><u>Mean change from baseline (pre-surgery):</u><br><u>Intervention: 53</u><br><u>Control: 55</u>                                                                                                                                 |
| Buker et al, 2014       | Determine the functional differences between patients who were treated with supervised physiotherapy or a standardized home program and perform a cost analysis.        | Not specified                         | No significant difference in mean pain <u>0-10</u> VAS scores (p-value not reported):<br>Rest pain - Intervention: 0.44 (SD 0.51); Control: 0.37 (SD 0.80)<br>Activity pain - Intervention: 3.11 (SD 1.96); Control: 2.50 (SD 1.77)<br><br><u>Mean change from baseline (pre-surgery):</u><br><u>Rest pain - Intervention: 4.86; Control: 4.78</u><br><u>Activity pain - Intervention: 6.14; Control: 5.46</u> |
| Chen et al, 2016        | To assess the impact of structured telephone reinforcement on patient                                                                                                   | Not specified (pilot study)           | No significant difference in mean <u>0-100</u> VAS pain scores (p-value not reported):                                                                                                                                                                                                                                                                                                                         |

### Appendix 3: Trial results summary

| Study                | Primary aim of the study                                                                                                                                                                           | Primary outcome (and measure)                      | Results summary                                                                                                                                                                                                                                            |
|----------------------|----------------------------------------------------------------------------------------------------------------------------------------------------------------------------------------------------|----------------------------------------------------|------------------------------------------------------------------------------------------------------------------------------------------------------------------------------------------------------------------------------------------------------------|
|                      | compliance with home exercises.                                                                                                                                                                    |                                                    | Intervention: 8.7 (SD 5.1)<br>Control: 9.3 (SD 5.5)<br><br><u>Mean change from baseline (pre-surgery):</u><br><u>Intervention: 63.5</u><br><u>Control: 63.8</u>                                                                                            |
| Fransen et al, 2017  | To evaluate the long-term benefit of providing a post-acute, class-based outpatient exercise program compared with current usual rehabilitation care.                                              | Pain and function (WOMAC pain and function scales) | No significant difference in mean <u>0-20</u> WOMAC pain scores (p=0.71):<br>Intervention: 2.6 (SE 0.2)<br>Control: 2.5 (SE 0.2)<br><br><u>Mean change from baseline (pre-surgery):</u><br><u>Intervention: 8.7</u><br><u>Control: 8.5</u>                 |
| Frost et al, 2002    | To assess the feasibility of comparing traditional exercise regimes with a more functional and dynamic approach.                                                                                   | Not specified (feasibility study)                  | No significant difference in mean <u>1-5</u> OKS item 'pain on walking' scores (p=0.68):<br>Intervention: 1.6 (SD 0.8)<br>Control: 1.5 (SD 0.93)<br><br><u>Mean change from baseline (pre-surgery):</u><br><u>Intervention: 2.6</u><br><u>Control: 2.8</u> |
| Kauppila et al, 2010 | To examine whether a multidisciplinary rehabilitation programme can improve functional recovery and quality of life and reduce the use of rehabilitation services compared with conventional care. | Function (WOMAC function scale)                    | No significant difference in mean <u>0-100</u> WOMAC pain scores (p=0.17):<br>Intervention: 23.5 (SD 22.3)<br>Control: 19.3 (SD 17.5)<br><br><u>Mean change from baseline (pre-surgery):</u>                                                               |

### Appendix 3: Trial results summary

| Study              | Primary aim of the study                                                                                                                                                              | Primary outcome (and measure)         | Results summary                                                                                                                                                                                                                                                                                                                                            |
|--------------------|---------------------------------------------------------------------------------------------------------------------------------------------------------------------------------------|---------------------------------------|------------------------------------------------------------------------------------------------------------------------------------------------------------------------------------------------------------------------------------------------------------------------------------------------------------------------------------------------------------|
|                    |                                                                                                                                                                                       |                                       | <u>Intervention: 39.3</u><br><u>Control: 37.1</u>                                                                                                                                                                                                                                                                                                          |
| Ko et al, 2013     | To determine whether center-based, one-to-one physical therapy provides superior outcomes compared with group-based therapy or a simple monitored home-based program.                 | Pain and function (Oxford Knee Score) | No significant difference in mean <u>0-50</u> WOMAC pain scores (p=0.79):<br>1:1 sessions: Median 3.8 (IQR 0.5-9.6)<br>Group sessions: Median 1.6 (IQR 0-7.5)<br>Home programme: Median 2.5 (IQR 0-9.5)<br><br><u>Mean change from baseline (pre-surgery):</u><br><u>1:1 sessions: 25.65</u><br><u>Group sessions: 18.4</u><br><u>Home programme: 25.7</u> |
| Kramer et al, 2003 | To compare clinic-based rehabilitation delivered in outpatient physical therapy clinics and home-based rehabilitation monitored by a physical therapist via periodic telephone calls. | Not specified                         | No significant difference in mean WOMAC pain scores (p-value and mean pain scores not reported)                                                                                                                                                                                                                                                            |
| Liebs et al, 2010  | Evaluate the effect of ergometer cycling on health-related quality of life and patient satisfaction.                                                                                  | Function (WOMAC function scale)       | No significant difference in mean <u>0-100</u> WOMAC pain scores (p=0.454):<br>Intervention: 15.6 (SD 17.9)<br>Control: 13.0 (SD 14.9)<br><br><u>Mean change from baseline (pre-surgery):</u><br><u>Intervention: 38.8</u><br><u>Control: 41.1</u>                                                                                                         |
| Liebs et al, 2012  | To evaluate if the timing of aquatic therapy influences clinical outcomes.                                                                                                            | Function (WOMAC function scale)       | No significant difference in mean <u>0-100</u> WOMAC pain scores (p=0.334):<br>Intervention: 13.2 (SD 15.0)<br>Control: 17.4 (SD 22.4)                                                                                                                                                                                                                     |

### Appendix 3: Trial results summary

| Study                  | Primary aim of the study                                                                                                                                                                                                                       | Primary outcome (and measure)         | Results summary                                                                                                                                                                                                                                                                                       |
|------------------------|------------------------------------------------------------------------------------------------------------------------------------------------------------------------------------------------------------------------------------------------|---------------------------------------|-------------------------------------------------------------------------------------------------------------------------------------------------------------------------------------------------------------------------------------------------------------------------------------------------------|
|                        |                                                                                                                                                                                                                                                |                                       | <u>Mean change from baseline (pre-surgery):</u><br><u>Intervention: 39.9</u><br><u>Control: 32.8</u>                                                                                                                                                                                                  |
| Minns Lowe et al, 2012 | To evaluate a pilot trial of a postdischarge physiotherapy intervention to improve patient function versus usual physiotherapy.                                                                                                                | Pain and function (Oxford Knee Score) | No statistical comparison of median <u>0-100</u> KOOS pain scores (pilot study):<br>Intervention: 80.6 (IQ 36)<br>Control: 90.3 (IQ 33)<br><br><u>Mean change from baseline (pre-surgery):</u><br><u>Intervention: 39.5</u><br><u>Control: 51.4</u>                                                   |
| Moffet et al, 2004     | To evaluate the effectiveness of a new intensive functional rehabilitation program on functional ability and quality of life.                                                                                                                  | Walking distance (6 minute walk test) | No significant difference in mean <u>0-100</u> WOMAC pain scores (p=0.161):<br>Intervention: 9.4 (SD 12.4)<br>Control: 11.8 (SD 13.0)<br><br><u>Mean change from baseline (2 months post-operative):</u><br><u>Intervention: 19</u><br><u>Control: 10.8</u>                                           |
| Monticone et al, 2013  | To compare the improvement in disability, kinesiophobia, pain, and quality of life obtained by means of home-based functional exercises aimed at managing kinesiophobia with advice to stay active after discharge from a rehabilitation unit. | Pain and function (KOOS)              | Mean <u>0-100</u> KOOS pain score significantly lower in intervention group (p<0.001):<br>Intervention: 87.35 (SD 11.71)<br>Control: 77.38 (SD 15.07)<br><br><u>Mean change from baseline (before discharge from the rehabilitation unit):</u><br><u>Intervention: 41.95</u><br><u>Control: 34.64</u> |
| Petterson et al, 2009  | To determine the effectiveness of progressive quadriceps strengthening                                                                                                                                                                         | Quadriceps strength and volitional    | No significant difference in mean <u>0-5</u> KOS ADL item 'affect of pain on function' (p value not reported):                                                                                                                                                                                        |

### Appendix 3: Trial results summary

| Study                 | Primary aim of the study                                                                 | Primary outcome (and measure)                       | Results summary                                                                                                                                                                                                               |
|-----------------------|------------------------------------------------------------------------------------------|-----------------------------------------------------|-------------------------------------------------------------------------------------------------------------------------------------------------------------------------------------------------------------------------------|
|                       | with or without neuromuscular electrical stimulation (NMES).                             | muscle activation (burst superimposition technique) | Intervention: 0.82 (SD not reported)<br>Control: 0.89 (SD not reported)<br><br><u>Mean change from baseline (3-4 weeks post-operative):</u><br><u>Intervention: 1.42</u><br><u>Control: 1.55</u>                              |
| Szots et al, 2016     | To evaluate the effects of structured nurse-managed telephone follow-up.                 | Function (WOMAC function scale)                     | No significant difference in mean change in <u>0-100 WOMAC pain scores from baseline (3 days post hospital discharge)</u> (p=0.329):<br>Intervention: -25.9 (95% CI = -30.8, -21.0)<br>Control: -29.5 (95% CI = -35.2, -23.8) |
| Vuorenmaa et al, 2014 | To evaluate the efficacy of a delayed home exercise programme compared with normal care. | Pain (WOMAC pain scale)                             | No significant difference in mean change in <u>0-100 WOMAC pain scores from baseline (2 months post-operative)</u> (p=0.70):<br>Intervention: -15 (95% CI -20 to -10)<br>Control: -14 (95% CI -19 to -9)                      |
