# Supplementary material for: Effectiveness of postdischarge interventions for reducing the severity of chronic pain after total knee replacement: systematic review of randomised controlled trials
Source: PubMed Central journal article supplement (PMC5855247; doi:10.1136/bmjopen-2017-020368), 2018-02-28
Supplement: bmjopen-2017-020368supp004.pdf [file bmjopen-2017-020368supp004.pdf]

#### Appendix 4: Adverse event reporting and findings

| Publication             | Adverse events assessment/definition                                                                                                                                                   | Results summary                                                                                                                                                                                                                                                                                                           |
|-------------------------|----------------------------------------------------------------------------------------------------------------------------------------------------------------------------------------|---------------------------------------------------------------------------------------------------------------------------------------------------------------------------------------------------------------------------------------------------------------------------------------------------------------------------|
| Buker et al, 2014       | None                                                                                                                                                                                   |                                                                                                                                                                                                                                                                                                                           |
| Bruun-Olsen et al, 2013 | None                                                                                                                                                                                   |                                                                                                                                                                                                                                                                                                                           |
| Buhagiar et al, 2017    | Postdischarge complication and adverse event data were collected until 1 year after surgery by self-report at follow-up visits and by a review of hospital electronic medical records. | Detailed breakdown of post-operative complications is provided in Table 3. There were no significant between-group differences in emergency department visits, readmissions and manipulations under anaesthetic.                                                                                                          |
| Chen et al, 2016        | None                                                                                                                                                                                   |                                                                                                                                                                                                                                                                                                                           |
| Fransen et al, 2017     | Adverse events defined as event resulting in readmission to the hospital or resulting in a medical intervention or reduced function for 3 or more days.                                | Intervention: 1 death, 24 hospital admissions (15 TKR related), 20 other adverse events<br><br>Control: 1 death, 16 hospital admissions (13 TKR related), 17 other adverse events                                                                                                                                         |
| Frost et al, 2002       | None                                                                                                                                                                                   |                                                                                                                                                                                                                                                                                                                           |
| Kauppila et al, 2010    | Not stated                                                                                                                                                                             | No adverse events due to the intervention were reported                                                                                                                                                                                                                                                                   |
| Ko et al, 2013          | Postoperative adverse events were monitored via treating therapists and documented by the blinded assessor.                                                                            | Detailed breakdown of post-operative adverse events provided in Appendix 1. Superficial wound infection, major infection, venous thrombotic embolism, neurovascular, TKR-related readmission and manipulation under anaesthetic similar between groups. No adverse events were associated with any of the treatment arms. |
| Kramer et al, 2003      | None                                                                                                                                                                                   |                                                                                                                                                                                                                                                                                                                           |
| Liebs et al, 2010       | Not stated                                                                                                                                                                             | Prevalence of postoperative complications was similar between groups.                                                                                                                                                                                                                                                     |
| Liebs et al, 2012       | Not stated                                                                                                                                                                             | 5 patients in early aquatic therapy group and 1 patient in the late aquatic therapy group admitted to hospital within 3 months of surgery.                                                                                                                                                                                |
| Minns Lowe et al, 2012  | Not stated                                                                                                                                                                             | No adverse events                                                                                                                                                                                                                                                                                                         |
| Moffet et al, 2004      | Not stated                                                                                                                                                                             | No adverse events                                                                                                                                                                                                                                                                                                         |
| Monticone et al, 2013   | None                                                                                                                                                                                   |                                                                                                                                                                                                                                                                                                                           |
| Petterson et al, 2009   | Not stated                                                                                                                                                                             | No adverse events were related to the                                                                                                                                                                                                                                                                                     |

|                       |            |                                                                                                                                                                                                                                                         |
|-----------------------|------------|---------------------------------------------------------------------------------------------------------------------------------------------------------------------------------------------------------------------------------------------------------|
|                       |            | exercise intervention. Only 1 patient reported feeling dizzy and lightheaded following the first NMES treatment.                                                                                                                                        |
| Szots et al, 2016     | None       |                                                                                                                                                                                                                                                         |
| Vuorenmaa et al, 2014 | Not stated | Intervention: 5 patients discontinued training due to pain (2 reported knee pain on operated side, 1 reported knee pain on the contralateral side, 1 reported back pain, and 1 reported hip pain), 1 patient had surgery due to reduced range of motion |
